# Supplementary material for: Multi-pollutants emissions from the burning of majoragricultural residues in China and the relatedhealth-economic effect assessment
Source: Copernicus journal article supplement (doi:10.5194/acp-2016-651), 2016-08-30
Supplement: Supplementary file 1 [file supplementary material for detailed emission inventories based on 6 versions.xlsx]

## Sheet: BAU-1
2012 total emission from filed burning																			2012 summer harvest emission from filed burning																			2012 autumn harvest emission from filed burning
Gg	PM2.5	PM1.0	OC	EC	char-EC	soot-EC	SO42-	NO3-	NH4+	K+	WSOA	WSA	PAHs	Phenols	THM	WSI			Gg	PM2.5	PM1.0	OC	EC	char-EC	soot-EC	SO42-	NO3-	NH4+	K+	WSOA	WSA	PAHs	Phenols	THM	WSI			Gg	PM2.5	PM1.0	OC	EC	char-EC	soot-EC	SO42-	NO3-	NH4+	K+	WSOA
Beijing	0	0	0	0	0	0	0	0	0	0	0	0	0	0	0	0			Beijing	0	0	0	0	0	0	0	0	0	0	0	0	0	0	0	0			Beijing	0	0	0	0	0	0	0	0	0	0	0
Tianjin	0	0	0	0	0	0	0	0	0	0	0	0	0	0	0	0			Tianjin	0	0	0	0	0	0	0	0	0	0	0	0	0	0	0	0			Tianjin	0	0	0	0	0	0	0	0	0	0	0
Hebei	53.6278	48.0708	23.2553	6.56794	5.71857	0.844138	1.65737	0.25817	1.55801	4.09697	0.944467	0.263353	0.024956	0.177688	0.456477	14.4999			Hebei	16.8674	15.3991	8.17506	1.96403	1.7613	0.200544	0.245187	0.0669353	0.442389	1.07053	0.455381	0.0559489	0.0080883	0.0778488	0.156395	3.70039			Hebei	36.7604	32.6717	15.0802	4.60391	3.95727	0.643594	1.41218	0.191235	1.11563	3.02644	0.489086
Shanxi	20.7745	18.6383	8.61896	2.64679	2.28787	0.356824	0.688418	0.105566	0.64902	1.6989	0.24432	0.106799	0.00969625	0.0629927	0.183792	5.97173			Shanxi	3.2478	2.96507	1.57409	0.37817	0.339136	0.0386145	0.0472104	0.0128883	0.0851813	0.206129	0.0876829	0.0107729	0.00155739	0.0149897	0.0301137	0.712504			Shanxi	17.5268	15.6732	7.04486	2.26862	1.94873	0.318209	0.641208	0.0926777	0.563839	1.49277	0.156637
Inner Mongolia	0.00269861	0.00246369	0.00130792	0.000314224	0.00028179	3.2085e-05	3.92274e-05	1.0709e-05	7.07777e-05	0.000171273	7.28562e-05	8.95125e-06	1.29404e-06	1.2455e-05	2.50217e-05	0.000592024			Inner Mongolia	0.00269861	0.00246369	0.00130792	0.000314224	0.00028179	3.2085e-05	3.92274e-05	1.0709e-05	7.07777e-05	0.000171273	7.28562e-05	8.95125e-06	1.29404e-06	1.2455e-05	2.50217e-05	0.000592024			Inner Mongolia	0.00269861	0.00246369	0.00130792	0.000314224	0.00028179	3.2085e-05	3.92274e-05	1.0709e-05	7.07777e-05	0.000171273	7.28562e-05
Liaoning	35.4346	31.7329	14.4274	4.76573	4.02803	0.735033	1.2102	0.172455	1.19019	2.73826	0.53545	0.207087	0.0167276	0.0897285	0.315764	9.90376			Liaoning	0	0	0	0	0	0	0	0	0	0	0	0	0	0	0	0			Liaoning	35.4346	31.7329	14.4274	4.76573	4.02803	0.735033	1.2102	0.172455	1.19019	2.73826	0.53545
Jilin	87.1311	78.0269	35.327	11.6284	9.87214	1.74921	3.02545	0.433955	2.89592	6.92754	1.15874	0.499373	0.0409903	0.225505	0.774736	24.8424			Jilin	0	0	0	0	0	0	0	0	0	0	0	0	0	0	0	0			Jilin	87.1311	78.0269	35.327	11.6284	9.87214	1.74921	3.02545	0.433955	2.89592	6.92754	1.15874
Heilongjiang	138.591	124.325	57.4411	19.2136	16.1573	3.04944	4.50286	0.626553	4.59569	9.888	2.85168	0.820559	0.0664076	0.337953	1.21636	36.2323			Heilongjiang	0.0910991	0.0831687	0.0441526	0.0106075	0.0095126	0.00108312	0.00132423	0.00036151	0.00238929	0.00578181	0.00245946	0.000302174	4.3684e-05	0.000420453	0.000844675	0.0199854			Heilongjiang	138.5	124.242	57.397	19.203	16.1478	3.04836	4.50154	0.626192	4.5933	9.88222	2.84922
Shanghai	0	0	0	0	0	0	0	0	0	0	0	0	0	0	0	0			Shanghai	0	0	0	0	0	0	0	0	0	0	0	0	0	0	0	0			Shanghai	0	0	0	0	0	0	0	0	0	0	0
Jiangsu	75.2779	67.6631	33.3992	10.2646	8.56848	1.69314	1.95473	0.285588	2.4433	4.3136	2.46972	0.443967	0.0364964	0.203142	0.65914	16.6349			Jiangsu	19.9655	18.2274	9.67656	2.32476	2.0848	0.237378	0.29022	0.0792292	0.523642	1.26715	0.53902	0.066225	0.00957387	0.0921472	0.18512	4.38004			Jiangsu	55.3125	49.4357	23.7226	7.9398	6.48368	1.45576	1.66451	0.206359	1.91966	3.04645	1.9307
Zhejiang	16.6341	14.904	7.18381	2.42777	1.97665	0.451102	0.469391	0.0591169	0.585854	0.868137	0.61315	0.113732	0.00817271	0.0332461	0.145196	3.53859			Zhejiang	1.85499	1.67069	0.824345	0.258688	0.214073	0.0445502	0.0447482	0.00668021	0.0628678	0.0998355	0.0646656	0.0112702	0.000908029	0.00483203	0.0167432	0.393562			Zhejiang	14.7791	13.2333	6.35946	2.16908	1.76257	0.406552	0.424643	0.0524366	0.522986	0.768301	0.548484
Anhui	48.9365	44.0059	21.8373	6.48412	5.48005	1.00153	1.27605	0.193709	1.51936	2.96691	1.48733	0.270284	0.0235504	0.144201	0.424191	11.1504			Anhui	18.3396	16.7048	8.76315	2.20713	1.94924	0.255818	0.296446	0.071634	0.50487	1.13392	0.519615	0.0694241	0.00882534	0.0783818	0.169279	4.00088			Anhui	30.5969	27.3011	13.0742	4.27699	3.53081	0.745712	0.979603	0.122075	1.01449	1.833	0.967711
Fujian	12.9187	11.5821	5.53975	1.91144	1.54976	0.361684	0.362293	0.0455409	0.466934	0.667863	0.475006	0.0900228	0.00637093	0.024557	0.114588	2.74215			Fujian	3.075	2.75551	1.32075	0.454974	0.367343	0.0876282	0.0850705	0.0106566	0.112922	0.154535	0.116128	0.0218166	0.00151657	0.00572582	0.0274753	0.644202			Fujian	9.84367	8.82655	4.219	1.45646	1.18242	0.274056	0.277222	0.0348844	0.354012	0.513328	0.358878
Jiangxi	33.159	29.6562	14.2955	4.8448	3.92261	0.92225	0.952368	0.116444	1.18556	1.68638	1.26116	0.234051	0.0162665	0.0626482	0.288398	6.99822			Jiangxi	12.7287	11.4056	5.46526	1.88439	1.5211	0.363291	0.352586	0.0440951	0.467786	0.639238	0.481067	0.0904356	0.00627817	0.0236084	0.11372	2.66629			Jiangxi	20.4303	18.2505	8.83026	2.96041	2.40152	0.558958	0.599782	0.0723488	0.717778	1.04715	0.780093
Shandong	108.038	96.9992	47.421	13.1719	11.4944	1.6668	3.16891	0.509745	3.10743	8.08565	2.03428	0.515784	0.0504285	0.370649	0.925742	28.5978			Shandong	41.043	37.47	19.8921	4.779	4.28572	0.487978	0.596606	0.162871	1.07645	2.60488	1.10806	0.136139	0.019681	0.189427	0.380552	9.00404			Shandong	66.9949	59.5292	27.5289	8.39291	7.20865	1.17882	2.5723	0.346873	2.03098	5.48077	0.926218
Henan	83.5134	75.3834	37.2587	10.3779	9.03983	1.32977	2.12162	0.372754	2.44554	5.9273	1.76469	0.383385	0.0395564	0.297817	0.743843	20.9919			Henan	40.4739	36.9505	19.6163	4.71274	4.22629	0.481212	0.588334	0.160613	1.06152	2.56876	1.0927	0.134251	0.0194081	0.1868	0.375275	8.87919			Henan	43.0395	38.4329	17.6424	5.6652	4.81354	0.848554	1.53329	0.212141	1.38402	3.35854	0.671993
Hubei	40.2449	35.9185	17.5924	5.48028	4.53654	0.942783	1.21377	0.156163	1.30705	2.31755	1.3592	0.257647	0.0193091	0.0952273	0.33482	9.10968			Hubei	8.55821	7.74581	3.92725	1.12259	0.953816	0.168183	0.17692	0.0319507	0.266441	0.490318	0.274123	0.043499	0.00415854	0.0284858	0.0780042	1.83797			Hubei	31.6867	28.1726	13.6652	4.35769	3.58272	0.7746	1.03685	0.124212	1.0406	1.82723	1.08508
Hunan	47.1121	42.1229	20.2266	6.80864	5.53651	1.27187	1.38535	0.171861	1.66654	2.51717	1.69349	0.326843	0.0229993	0.0923166	0.408697	10.259			Hunan	12.5923	11.2851	5.41203	1.86116	1.50335	0.357796	0.347542	0.0436712	0.461762	0.633664	0.474874	0.0891021	0.00620959	0.0236212	0.112535	2.63867			Hunan	34.5198	30.8378	14.8146	4.94748	4.03317	0.914073	1.0378	0.12819	1.20477	1.88351	1.21861
Guangdong	28.7463	25.7616	12.281	4.22364	3.42693	0.796535	0.816061	0.103592	1.04271	1.52409	1.0213	0.19989	0.0141276	0.0553265	0.256058	6.21951			Guangdong	12.3901	11.1019	5.31875	1.83493	1.48095	0.353975	0.343482	0.0429118	0.455563	0.62196	0.468497	0.088109	0.00611147	0.022923	0.110689	2.59516			Guangdong	16.3561	14.6596	6.96225	2.38871	1.94598	0.44256	0.472579	0.0606798	0.587147	0.902129	0.552801
Guangxi	23.0316	20.6375	9.75318	3.32977	2.72233	0.607002	0.679737	0.0885477	0.822294	1.32814	0.72898	0.155126	0.0112346	0.0470257	0.204927	5.25965			Guangxi	8.49982	7.61606	3.64867	1.25883	1.01597	0.242852	0.23565	0.0294375	0.312536	0.426658	0.321409	0.0604487	0.00419258	0.0157222	0.0759337	1.78031			Guangxi	14.5317	13.0215	6.10451	2.07094	1.70636	0.364149	0.444087	0.0591102	0.509758	0.90148	0.407571
Hainan	3.92082	3.51364	1.67492	0.576023	0.467325	0.108674	0.111318	0.0141308	0.142286	0.207863	0.139282	0.0272761	0.00192679	0.00754248	0.0349327	0.848426			Hainan	1.61822	1.44996	0.694617	0.239675	0.193432	0.0462435	0.0448705	0.00560414	0.0595069	0.0812216	0.0611963	0.0115104	0.000798203	0.00299182	0.0144563	0.338935			Hainan	2.3026	2.06368	0.980303	0.336347	0.273893	0.0624301	0.066448	0.00852664	0.0827791	0.126642	0.0780856
Chongqing	13.6755	12.2678	5.76602	1.93026	1.6011	0.32868	0.414042	0.0565614	0.469307	0.870778	0.366246	0.0858296	0.00661737	0.0313851	0.121176	3.31118			Chongqing	0.527271	0.48137	0.25555	0.0613949	0.0550578	0.00626895	0.00766448	0.00209238	0.0138289	0.0334644	0.0142351	0.00174895	0.000252838	0.00243353	0.00488887	0.115673			Chongqing	13.1482	11.7864	5.51048	1.86887	1.54604	0.322411	0.406377	0.054469	0.455478	0.837313	0.352011
Sichuan	44.3929	39.881	18.9947	6.17573	5.14323	1.03059	1.27126	0.181158	1.50145	2.78735	1.21898	0.269406	0.0214779	0.110179	0.395964	10.5718			Sichuan	5.56286	5.07859	2.69612	0.647733	0.580875	0.0661392	0.0808624	0.0220752	0.145899	0.353059	0.150184	0.0184519	0.00266751	0.0256744	0.051579	1.22038			Sichuan	38.8301	34.8024	16.2986	5.528	4.56236	0.964447	1.1904	0.159083	1.35555	2.43429	1.0688
Guizhou	12.0304	10.7908	5.0457	1.66482	1.39008	0.274135	0.371629	0.0521644	0.408642	0.810923	0.283217	0.0732162	0.00577692	0.0292036	0.10705	3.03136			Guizhou	0.68852	0.628582	0.333702	0.0801705	0.0718954	0.00818611	0.0100084	0.00273226	0.0180581	0.0436984	0.0185884	0.00228381	0.00033016	0.00317775	0.00638398	0.151048			Guizhou	11.3419	10.1622	4.712	1.58465	1.31818	0.265949	0.36162	0.0494321	0.390584	0.767224	0.264629
Yunnan	25.263	22.6753	10.5832	3.50916	2.94262	0.565364	0.78924	0.110537	0.841364	1.73225	0.577159	0.150518	0.0121478	0.0619877	0.222629	6.40935			Yunnan	1.84657	1.67472	0.858647	0.235769	0.202724	0.0328911	0.0354878	0.00699669	0.055342	0.108496	0.0569437	0.00861282	0.000894472	0.00670943	0.0168995	0.398593			Yunnan	23.4165	21.0006	9.72451	3.27339	2.73989	0.532473	0.753752	0.103541	0.786022	1.62375	0.520215
Tibet	0	0	0	0	0	0	0	0	0	0	0	0	0	0	0	0			Tibet	0	0	0	0	0	0	0	0	0	0	0	0	0	0	0	0			Tibet	0	0	0	0	0	0	0	0	0	0	0
Shannxi	18.057	16.2423	7.77334	2.29059	1.98335	0.305565	0.534133	0.0853567	0.544929	1.36372	0.314184	0.0891812	0.00850644	0.0583604	0.158831	4.82503			Shannxi	5.37631	4.90829	2.60571	0.626012	0.561396	0.0639214	0.0781508	0.0213349	0.141007	0.34122	0.145148	0.0178331	0.00257806	0.0248135	0.0498494	1.17946			Shannxi	12.6807	11.334	5.16762	1.66458	1.42195	0.241643	0.455983	0.0640218	0.403923	1.0225	0.169036
Gansu	6.52064	5.85472	2.78251	0.816547	0.710252	0.105662	0.20447	0.0319812	0.193675	0.512749	0.0988529	0.0319889	0.00304821	0.0210825	0.0565004	1.80118			Gansu	1.11068	1.01399	0.538308	0.129327	0.115978	0.0132054	0.016145	0.00440753	0.0291303	0.0704918	0.0299858	0.00368411	0.000532596	0.00512616	0.0102983	0.243662			Gansu	5.40996	4.84073	2.2442	0.68722	0.594275	0.0924567	0.188325	0.0275736	0.164545	0.442257	0.0688672
Qinghai	0	0	0	0	0	0	0	0	0	0	0	0	0	0	0	0			Qinghai	0	0	0	0	0	0	0	0	0	0	0	0	0	0	0	0			Qinghai	0	0	0	0	0	0	0	0	0	0	0
Ningxia	2.70951	2.43351	1.13532	0.357789	0.304568	0.0529987	0.084356	0.0127627	0.0881952	0.202624	0.0467274	0.0148748	0.00128306	0.00766797	0.0242928	0.729994			Ningxia	0	0	0	0	0	0	0	0	0	0	0	0	0	0	0	0			Ningxia	2.70951	2.43351	1.13532	0.357789	0.304568	0.0529987	0.084356	0.0127627	0.0881952	0.202624	0.0467274
Xinjiang	21.3046	18.4284	9.89345	2.13746	1.88609	0.250729	0.951578	0.100748	0.406814	1.45281	0.754234	0.12371	0.00919675	0.0650659	0.109124	5.47544			Xinjiang	2.52756	2.30753	1.22502	0.294306	0.263929	0.0300513	0.0367409	0.0100302	0.0662914	0.160417	0.0682382	0.00838387	0.00121202	0.0116655	0.0234356	0.554498			Xinjiang	18.777	16.1209	8.66843	1.84316	1.62216	0.220678	0.914837	0.0907177	0.340523	1.29239	0.685995
	PM2.5	PM1.0	OC	EC	char-EC	soot-EC	SO42-	NO3-	NH4+	K+	WSOA	WSA	PAHs	Phenols	THM	WSI				PM2.5	PM1.0	OC	EC	char-EC	soot-EC	SO42-	NO3-	NH4+	K+	WSOA	WSA	PAHs	Phenols	THM	WSI				PM2.5	PM1.0	OC	EC	char-EC	soot-EC	SO42-	NO3-	NH4+	K+	WSOA
Nationwide	1001.05	897.518	429.509	133.606	112.747	20.8015	30.2166	4.34517	32.0781	67.4937	24.4419	5.75391	0.477273	2.71251	8.68326	249.956			Nationwide	218.988	198.926	102.867	27.3667	23.7582	3.58784	3.9613	0.83922	6.36546	13.1156	6.55028	0.950262	0.10582	0.847538	2.0105	47.456			Nationwide	782.063	698.594	326.643	106.24	88.989	17.2137	26.2554	3.50596	25.7127	54.3783	17.8917
2012 flux concentration of smoke PM2.5																			2012 summer harvest flux concentration of smoke PM2.5																			2012 autumn harvest flux concentration of smoke PM2.5
μg/m³/d	PM2.5	PM1.0	OC	EC	char-EC	soot-EC	SO42-	NO3-	NH4+	K+	WSOA	WSA	PAHs	Phenols	THM	WSI			μg/m³/d	PM2.5	PM1.0	OC	EC	char-EC	soot-EC	SO42-	NO3-	NH4+	K+	WSOA	WSA	PAHs	Phenols	THM	WSI			μg/m³/d	PM2.5	PM1.0	OC	EC	char-EC	soot-EC	SO42-	NO3-	NH4+	K+	WSOA
Beijing	0	0	0	0	0	0	0	0	0	0	0	0	0	0	0	0			Beijing	0	0	0	0	0	0	0	0	0	0	0	0	0	0	0	0			Beijing	0	0	0	0	0	0	0	0	0	0	0
Tianjin	0	0	0	0	0	0	0	0	0	0	0	0	0	0	0	0			Tianjin	0	0	0	0	0	0	0	0	0	0	0	0	0	0	0	0			Tianjin	0	0	0	0	0	0	0	0	0	0	0
Hebei	5.03002	4.50879	2.18122	0.616039	0.536373	0.0791758	0.155453	0.024215	0.146134	0.384275	0.0885862	0.0247012	0.00234074	0.0166662	0.0428152	1.36001			Hebei	3.33994	3.04919	1.61875	0.388899	0.348758	0.03971	0.0485498	0.0132539	0.0875981	0.211977	0.0901706	0.0110785	0.00160158	0.0154149	0.0309681	0.732719			Hebei	6.55108	5.82243	2.68745	0.820464	0.705226	0.114695	0.251665	0.03408	0.198816	0.539342	0.0871602
Shanxi	2.33063	2.09096	0.966932	0.296934	0.256668	0.0400309	0.0772313	0.0118431	0.0728114	0.190594	0.0274094	0.0119814	0.00108779	0.00706694	0.020619	0.669948			Shanxi	0.769203	0.702242	0.372806	0.0895652	0.0803204	0.00914539	0.0111812	0.00305244	0.0201742	0.0488192	0.0207667	0.00255143	0.00036885	0.00355013	0.00713208	0.168748			Shanxi	3.73591	3.34081	1.50165	0.483566	0.415381	0.0678278	0.136676	0.0197547	0.120185	0.318191	0.0333879
Inner Mongolia	4.13429e-05	3.77439e-05	2.00375e-05	4.81393e-06	4.31704e-06	4.91544e-07	6.00966e-07	1.64062e-07	1.08432e-06	2.62392e-06	1.11616e-06	1.37134e-07	1.98248e-08	1.90811e-07	3.83333e-07	9.06984e-06			Inner Mongolia	8.72795e-05	7.96816e-05	4.23013e-05	1.01627e-05	9.11375e-06	1.0377e-06	1.26871e-06	3.46353e-07	2.28912e-06	5.53939e-06	2.35634e-06	2.89504e-07	4.18524e-08	4.02824e-07	8.09259e-07	1.91474e-05			Inner Mongolia	7.85516e-05	7.17134e-05	3.80712e-05	9.14646e-06	8.20238e-06	9.33934e-07	1.14184e-06	3.11717e-07	2.0602e-06	4.98545e-06	2.12071e-06
Liaoning	4.27963	3.83256	1.74248	0.575584	0.486487	0.088774	0.146162	0.0208283	0.143746	0.330715	0.0646693	0.025011	0.00202029	0.010837	0.0381365	1.19613			Liaoning	0	0	0	0	0	0	0	0	0	0	0	0	0	0	0	0			Liaoning	8.1313	7.28186	3.31071	1.09361	0.924326	0.168671	0.277709	0.0395738	0.273117	0.628358	0.122872
Jilin	8.0225	7.18424	3.2527	1.07067	0.908967	0.161057	0.278565	0.039956	0.266639	0.637846	0.106689	0.0459792	0.00377414	0.0207631	0.071333	2.28734			Jilin	0	0	0	0	0	0	0	0	0	0	0	0	0	0	0	0			Jilin	15.2428	13.6501	6.18013	2.03427	1.72704	0.306008	0.529274	0.0759163	0.506614	1.21191	0.20271
Heilongjiang	5.40223	4.84615	2.23904	0.748941	0.629807	0.118867	0.175521	0.0244229	0.179139	0.385432	0.111158	0.0319852	0.00258855	0.0131733	0.0474135	1.41232			Heilongjiang	0.0074966	0.006844	0.00363334	0.000872897	0.000782797	8.91304e-05	0.000108972	2.97489e-05	0.000196617	0.000475788	0.000202391	2.48661e-05	3.59478e-06	3.45993e-05	6.95088e-05	0.00164461			Heilongjiang	10.2575	9.20153	4.25091	1.4222	1.19593	0.225766	0.333391	0.0463768	0.340187	0.731892	0.211018
Shanghai	0	0	0	0	0	0	0	0	0	0	0	0	0	0	0	0			Shanghai	0	0	0	0	0	0	0	0	0	0	0	0	0	0	0	0			Shanghai	0	0	0	0	0	0	0	0	0	0	0
Jiangsu	13.0821	11.7588	5.80425	1.78382	1.48907	0.29424	0.339702	0.0496307	0.424607	0.749636	0.429198	0.0771544	0.00634249	0.0353029	0.114548	2.89088			Jiangsu	7.32488	6.68723	3.55011	0.852901	0.764866	0.0870887	0.106475	0.0290674	0.192113	0.46489	0.197754	0.0242965	0.00351244	0.0338067	0.0679166	1.60694			Jiangsu	18.2636	16.3232	7.83297	2.62164	2.14085	0.480676	0.549605	0.0681377	0.633852	1.00591	0.637497
Zhejiang	2.85978	2.56234	1.23506	0.417389	0.339831	0.0775547	0.080699	0.0101635	0.100722	0.149252	0.105414	0.0195532	0.00140508	0.00571576	0.0249625	0.608363			Zhejiang	0.673267	0.606375	0.299194	0.0938905	0.0776973	0.0161694	0.0162413	0.00242457	0.0228177	0.0362351	0.0234702	0.00409049	0.000329567	0.00175378	0.0060769	0.142843			Zhejiang	4.82764	4.32271	2.07734	0.708538	0.575751	0.132801	0.138711	0.0171286	0.170835	0.250968	0.179164
Anhui	6.11505	5.49893	2.72877	0.810249	0.684781	0.12515	0.159454	0.0242057	0.189858	0.370742	0.185855	0.0337744	0.00294283	0.0180192	0.0530065	1.39334			Anhui	4.83803	4.40676	2.31174	0.582246	0.514213	0.0674854	0.0782032	0.0188972	0.133186	0.29913	0.137076	0.0183142	0.00232815	0.0206773	0.0446563	1.05544			Anhui	7.26437	6.48188	3.1041	1.01545	0.838293	0.177048	0.232579	0.0289834	0.240863	0.435194	0.229756
Fujian	1.85935	1.66697	0.79732	0.275108	0.223052	0.0520561	0.0521438	0.00655458	0.0672045	0.0961236	0.0683663	0.0129567	0.00091695	0.00353442	0.0164923	0.39467			Fujian	0.934326	0.837251	0.401305	0.138242	0.111616	0.0266255	0.0258484	0.00323797	0.0343109	0.0469549	0.0352851	0.00662888	0.000460804	0.00173977	0.00834828	0.195738			Fujian	2.69187	2.41372	1.15373	0.398287	0.323345	0.0749437	0.0758097	0.00953953	0.0968088	0.140376	0.0981393
Jiangxi	3.47717	3.10985	1.49908	0.508043	0.411339	0.0967102	0.0998686	0.0122107	0.124322	0.17684	0.13225	0.0245434	0.00170576	0.0065695	0.0302424	0.733857			Jiangxi	2.81786	2.52496	1.20989	0.417163	0.336738	0.0804248	0.078055	0.0097617	0.103558	0.141513	0.106498	0.0200205	0.00138985	0.00522639	0.0251752	0.590258			Jiangxi	4.07055	3.63625	1.75935	0.589834	0.478479	0.111367	0.119501	0.0144148	0.143011	0.208634	0.155426
Shandong	12.3542	11.0919	5.42261	1.50621	1.31439	0.190599	0.362366	0.0582895	0.355335	0.924597	0.232621	0.0589801	0.00576652	0.0423839	0.105859	3.27017			Shandong	9.90803	9.04551	4.80208	1.15368	1.0346	0.117801	0.144024	0.0393182	0.259862	0.628835	0.267493	0.0328647	0.00475112	0.0457288	0.0918676	2.17363			Shandong	14.5557	12.9336	5.98108	1.82349	1.56619	0.256118	0.558873	0.0753637	0.441261	1.19078	0.201235
Henan	8.84751	7.98621	3.94723	1.09945	0.95769	0.140877	0.224767	0.03949	0.259083	0.627945	0.186954	0.0406162	0.00419065	0.0315511	0.0788036	2.22391			Henan	9.05213	8.26411	4.38725	1.05402	0.945226	0.107625	0.131583	0.0359217	0.237414	0.574513	0.244386	0.0300257	0.00434069	0.0417786	0.0839317	1.98586			Henan	8.66335	7.7361	3.5512	1.14034	0.968909	0.170804	0.308633	0.0427015	0.278586	0.676035	0.135264
Hubei	3.79265	3.38493	1.6579	0.516457	0.42752	0.0888472	0.114385	0.0147167	0.123175	0.218404	0.12809	0.0242805	0.00181967	0.00897415	0.0315532	0.858489			Hubei	1.70265	1.54103	0.781325	0.223339	0.189761	0.03346	0.0351982	0.00635657	0.0530084	0.0975485	0.0545366	0.0086541	0.000827339	0.00566723	0.0155189	0.365663			Hubei	5.67364	5.04444	2.44681	0.780264	0.641503	0.138696	0.185652	0.0222408	0.186325	0.327175	0.194289
Hunan	3.89104	3.47898	1.67054	0.562334	0.457267	0.105045	0.114417	0.0141942	0.137641	0.207896	0.139867	0.0269944	0.00189954	0.00762454	0.0337548	0.847304			Hunan	2.19559	1.96765	0.943637	0.32451	0.262123	0.0623851	0.0605971	0.00761447	0.0805124	0.110485	0.0827987	0.0155358	0.0010827	0.00411857	0.0196214	0.460077			Hunan	5.41696	4.83917	2.32475	0.776376	0.632898	0.143439	0.162856	0.020116	0.189057	0.295566	0.191229
Guangdong	2.84792	2.55222	1.21669	0.418439	0.339509	0.0789134	0.0808478	0.0102629	0.103302	0.150993	0.101181	0.0198033	0.00139963	0.00548124	0.0253678	0.616172			Guangdong	2.59139	2.32196	1.11241	0.383774	0.30974	0.0740337	0.0718391	0.00897498	0.0952809	0.130083	0.0979859	0.018428	0.00127821	0.00479434	0.0231505	0.542777			Guangdong	3.07879	2.75945	1.31054	0.449638	0.3663	0.083305	0.0889557	0.011422	0.110521	0.169812	0.104056
Guangxi	1.70627	1.52891	0.722553	0.246682	0.201681	0.044969	0.0503575	0.00655995	0.0609187	0.0983935	0.0540056	0.0114923	0.000832305	0.00348384	0.0151818	0.389655			Guangxi	1.32936	1.19115	0.57065	0.196879	0.158897	0.0379819	0.0368554	0.004604	0.0488804	0.066729	0.0502681	0.00945413	0.000655716	0.00245894	0.011876	0.278439			Guangxi	2.04548	1.83289	0.859266	0.291505	0.240186	0.0512574	0.0625093	0.0083203	0.0717531	0.126892	0.0573694
Hainan	2.02438	1.81415	0.864786	0.297409	0.241287	0.0561098	0.0574754	0.00729593	0.0734644	0.107323	0.0719133	0.0140831	0.00099483	0.00389429	0.0180363	0.438055			Hainan	1.76386	1.58045	0.757131	0.261246	0.21084	0.0504053	0.0489087	0.0061085	0.0648624	0.0885314	0.0667039	0.0125463	0.000870039	0.00326108	0.0157574	0.369439			Hainan	2.25885	2.02447	0.961675	0.329956	0.268688	0.0612438	0.0651853	0.00836462	0.0812061	0.124235	0.0766018
Chongqing	2.90675	2.60754	1.22558	0.410282	0.340317	0.0698617	0.0880055	0.0120223	0.0997523	0.185086	0.0778464	0.0182433	0.00140654	0.00667099	0.0257563	0.703798			Chongqing	0.236598	0.216001	0.114671	0.0275492	0.0247056	0.00281302	0.00343922	0.000938895	0.00620535	0.0150162	0.00638758	0.00078479	0.000113454	0.00109198	0.00219374	0.051905			Chongqing	5.30989	4.75993	2.2254	0.754741	0.624367	0.130205	0.164115	0.0219973	0.183945	0.338149	0.142159
Sichuan	1.60811	1.44467	0.688074	0.223713	0.186311	0.0373324	0.0460508	0.00656235	0.0543893	0.10097	0.0441569	0.0097591	0.000778027	0.00399119	0.0143436	0.382957			Sichuan	0.425413	0.388379	0.206183	0.0495346	0.0444217	0.00505792	0.00618386	0.00168817	0.0111575	0.0269998	0.0114851	0.00141109	0.000203995	0.00196342	0.00394444	0.0933274			Sichuan	2.67254	2.39533	1.12178	0.380473	0.314011	0.0663794	0.081931	0.0109491	0.0932979	0.167543	0.0735614
Guizhou	1.19749	1.0741	0.502242	0.165714	0.138367	0.027287	0.0369914	0.00519236	0.0406756	0.080718	0.028191	0.00728783	0.000575026	0.00290689	0.0106556	0.301737			Guizhou	0.144683	0.132088	0.070123	0.0168468	0.0151079	0.0017202	0.00210314	0.000574149	0.00379467	0.00918265	0.00390611	0.000479912	6.93788e-05	0.000667762	0.00134151	0.0317408			Guizhou	2.14501	1.9219	0.891148	0.299694	0.249299	0.0502971	0.0683908	0.00934875	0.0738685	0.1451	0.0500474
Yunnan	1.15426	1.03603	0.483542	0.160333	0.134447	0.0258313	0.0360602	0.00505043	0.0384417	0.079146	0.0263702	0.00687714	0.000555032	0.0028322	0.0101719	0.292842			Yunnan	0.178113	0.161537	0.0828218	0.0227414	0.019554	0.00317255	0.00342301	0.000674873	0.00533808	0.0104651	0.00549257	0.00083076	8.62773e-05	0.000647165	0.00163006	0.0384467			Yunnan	2.0328	1.82307	0.84419	0.284165	0.237852	0.0462242	0.0654337	0.00898842	0.068235	0.140959	0.0451602
Tibet	0	0	0	0	0	0	0	0	0	0	0	0	0	0	0	0			Tibet	0	0	0	0	0	0	0	0	0	0	0	0	0	0	0	0			Tibet	0	0	0	0	0	0	0	0	0	0	0
Shannxi	1.53856	1.38394	0.662333	0.195172	0.168993	0.0260359	0.0455112	0.00727288	0.0464311	0.116197	0.0267703	0.00759875	0.000724798	0.00497264	0.0135333	0.41112			Shannxi	0.967085	0.882897	0.468712	0.112606	0.100983	0.0114981	0.0140577	0.0038377	0.0253641	0.0613782	0.026109	0.0032078	0.000463738	0.00446342	0.00896685	0.21216			Shannxi	2.05289	1.83487	0.836591	0.269481	0.230201	0.0391199	0.0738194	0.0103645	0.0653914	0.165534	0.0273655
Gansu	0.282494	0.253644	0.120546	0.0353752	0.0307703	0.0045776	0.00885824	0.00138552	0.00839058	0.0222138	0.0042826	0.00138586	0.000132058	0.000913358	0.00244777	0.0780324			Gansu	0.101582	0.0927394	0.0492335	0.0118282	0.0106073	0.00120776	0.00147662	0.000403111	0.00266425	0.00644715	0.00274249	0.000336947	4.8711e-05	0.000468837	0.000941877	0.0222852			Gansu	0.445314	0.398458	0.184728	0.0565676	0.0489169	0.00761045	0.0155017	0.00226969	0.0135443	0.0364038	0.00566871
Qinghai	0	0	0	0	0	0	0	0	0	0	0	0	0	0	0	0			Qinghai	0	0	0	0	0	0	0	0	0	0	0	0	0	0	0	0			Qinghai	0	0	0	0	0	0	0	0	0	0	0
Ningxia	0.916731	0.82335	0.384122	0.121054	0.103047	0.0179315	0.0285409	0.0043181	0.0298398	0.0685554	0.0158097	0.0050327	0.000434109	0.00259437	0.00821918	0.246985			Ningxia	0	0	0	0	0	0	0	0	0	0	0	0	0	0	0	0			Ningxia	1.74179	1.56436	0.729833	0.230002	0.195789	0.0340698	0.0542277	0.00820438	0.0566956	0.130255	0.0300384
Xinjiang	0.228843	0.197949	0.10627	0.0229595	0.0202594	0.00269321	0.0102214	0.00108218	0.00436979	0.0156054	0.00810159	0.00132883	9.87868e-05	0.000698905	0.00117216	0.0588143			Xinjiang	0.0573162	0.0523266	0.0277791	0.00667383	0.00598497	0.000681457	0.000833155	0.000227449	0.00150325	0.0036377	0.0015474	0.000190117	2.74843e-05	0.000264533	0.000531438	0.0125741			Xinjiang	0.383217	0.329008	0.176912	0.0376167	0.0331064	0.00450378	0.0186708	0.00185144	0.00694968	0.0263762	0.0140004
	PM2.5	PM1.0	OC	EC	char-EC	soot-EC	SO42-	NO3-	NH4+	K+	WSOA	WSA	PAHs	Phenols	THM	WSI				PM2.5	PM1.0	OC	EC	char-EC	soot-EC	SO42-	NO3-	NH4+	K+	WSOA	WSA	PAHs	Phenols	THM	WSI				PM2.5	PM1.0	OC	EC	char-EC	soot-EC	SO42-	NO3-	NH4+	K+	WSOA
Nationwide	1.85845	1.66624	0.797383	0.24804	0.209315	0.0386181	0.0560972	0.00806681	0.0595531	0.125302	0.0453764	0.0106821	0.000886057	0.00503578	0.0161205	0.464044			Nationwide	0.858275	0.779647	0.403166	0.107258	0.0931149	0.0140618	0.0155254	0.00328914	0.024948	0.0514037	0.0256724	0.00372434	0.000414737	0.00332174	0.0078797	0.185993			Nationwide	2.75861	2.46419	1.15218	0.374744	0.313895	0.0607188	0.092612	0.0123668	0.0906979	0.191811	0.0631103
[truncated: 5 more columns]

## Sheet: BAU-2
2012 total emission from filed burning																			2012 summer harvest emission from filed burning																			2012 autumn harvest emission from filed burning
Gg	PM2.5	PM1.0	OC	EC	char-EC	soot-EC	SO42-	NO3-	NH4+	K+	WSOA	WSA	PAHs	Phenols	THM	WSI			Gg	PM2.5	PM1.0	OC	EC	char-EC	soot-EC	SO42-	NO3-	NH4+	K+	WSOA	WSA	PAHs	Phenols	THM	WSI			Gg	PM2.5	PM1.0	OC	EC	char-EC	soot-EC	SO42-	NO3-	NH4+	K+	WSOA
Beijing	1.60668	1.44324	0.666647	0.205117	0.177276	0.0276721	0.0520437	0.00814937	0.0507506	0.131373	0.0182557	0.00819091	0.000751339	0.00492846	0.0144272	0.461319			Beijing	0.282754	0.258139	0.137041	0.0329236	0.0295252	0.00336178	0.00411015	0.00112206	0.0074159	0.0179456	0.00763369	0.000937889	0.000135587	0.001305	0.0026217	0.0620308			Beijing	1.32393	1.1851	0.529606	0.172193	0.14775	0.0243103	0.0479336	0.00702732	0.0433347	0.113427	0.010622
Tianjin	2.66912	2.37873	1.15489	0.323746	0.280573	0.0429502	0.0902554	0.0128837	0.0759039	0.20166	0.0524504	0.0139872	0.00123083	0.00831571	0.0215307	0.723217			Tianjin	0.572291	0.522471	0.277369	0.0666369	0.0597588	0.00680421	0.00831889	0.00227103	0.0150097	0.0363217	0.0154505	0.00189828	0.000274426	0.00264131	0.0053063	0.12555			Tianjin	2.09683	1.85626	0.87752	0.257109	0.220814	0.036146	0.0819365	0.0106126	0.0608942	0.165339	0.0369999
Hebei	45.5837	40.8602	19.767	5.58275	4.86079	0.717517	1.40876	0.219445	1.32431	3.48242	0.802797	0.22385	0.0212126	0.151035	0.388005	12.3249			Hebei	14.3373	13.0892	6.9488	1.66942	1.49711	0.170463	0.208409	0.056895	0.376031	0.909949	0.387074	0.0475566	0.00687505	0.0661715	0.132936	3.14533			Hebei	31.2464	27.771	12.8182	3.91332	3.36368	0.547055	1.20036	0.16255	0.948282	2.57247	0.415723
Shanxi	17.6584	15.8425	7.32611	2.24977	1.94469	0.3033	0.585156	0.0897311	0.551667	1.44407	0.207672	0.0907789	0.00824182	0.0535438	0.156223	5.07597			Shanxi	2.76063	2.52031	1.33798	0.321445	0.288265	0.0328223	0.0401288	0.010955	0.0724041	0.175209	0.0745304	0.00915695	0.00132378	0.0127412	0.0255966	0.605629			Shanxi	14.8977	13.3222	5.98813	1.92832	1.65642	0.270478	0.545027	0.078776	0.479263	1.26886	0.133141
Inner Mongolia	21.5367	19.3016	8.67695	2.84794	2.44434	0.401744	0.768865	0.111597	0.691694	1.80546	0.214562	0.116918	0.0100934	0.0584182	0.189596	6.34894			Inner Mongolia	0.0259603	0.0233066	0.0112929	0.00375952	0.00306235	0.000696829	0.000684234	9.12677e-05	0.000926181	0.00133882	0.000952544	0.000174411	1.27681e-05	5.5462e-05	0.000232829	0.00546417			Inner Mongolia	21.5135	19.2808	8.66697	2.8445	2.44156	0.401079	0.76822	0.111516	0.690839	1.80429	0.213683
Liaoning	21.2607	19.0397	8.65645	2.85944	2.41682	0.44102	0.726119	0.103473	0.714114	1.64296	0.32127	0.124252	0.0100366	0.0538371	0.189458	5.94226			Liaoning	0	0	0	0	0	0	0	0	0	0	0	0	0	0	0	0			Liaoning	21.2607	19.0397	8.65645	2.85944	2.41682	0.44102	0.726119	0.103473	0.714114	1.64296	0.32127
Jilin	34.8524	31.2108	14.1308	4.65135	3.94886	0.699686	1.21018	0.173582	1.15837	2.77102	0.463495	0.199749	0.0163961	0.0902019	0.309895	9.93697			Jilin	0	0	0	0	0	0	0	0	0	0	0	0	0	0	0	0			Jilin	34.8524	31.2108	14.1308	4.65135	3.94886	0.699686	1.21018	0.173582	1.15837	2.77102	0.463495
Heilongjiang	55.4363	49.7299	22.9764	7.68543	6.46291	1.21978	1.80115	0.250621	1.83827	3.9552	1.14067	0.328224	0.026563	0.135181	0.486545	14.4929			Heilongjiang	0.0364396	0.0332675	0.017661	0.00424299	0.00380504	0.000433247	0.000529691	0.000144604	0.000955718	0.00231272	0.000983784	0.00012087	1.74736e-05	0.000168181	0.00033787	0.00799416			Heilongjiang	55.3998	49.6966	22.9588	7.68118	6.45911	1.21934	1.80062	0.250477	1.83732	3.95289	1.13969
Shanghai	2.84776	2.55716	1.24957	0.402731	0.331115	0.0715534	0.0749253	0.0103018	0.0976922	0.152767	0.100898	0.0182403	0.00139242	0.00669671	0.0252016	0.609826			Shanghai	0.471056	0.430049	0.228304	0.0548492	0.0491878	0.00560059	0.00684733	0.0018693	0.0123546	0.0298966	0.0127174	0.00156248	0.000225881	0.00217408	0.00436765	0.103341			Shanghai	2.37671	2.12711	1.02126	0.347882	0.281927	0.0659528	0.068078	0.00843247	0.0853376	0.122871	0.0881808
Jiangsu	80.2965	72.174	35.6258	10.9489	9.13971	1.80601	2.08505	0.304628	2.60619	4.60118	2.63437	0.473564	0.0389294	0.216685	0.703083	17.7439			Jiangsu	21.2965	19.4426	10.3217	2.47974	2.22378	0.253203	0.309568	0.0845112	0.558552	1.35163	0.574955	0.07064	0.0102121	0.0982903	0.197462	4.67204			Jiangsu	59	52.7314	25.3041	8.46912	6.91592	1.55281	1.77548	0.220116	2.04764	3.24955	2.05941
Zhejiang	17.743	15.8976	7.66273	2.58962	2.10842	0.481175	0.500684	0.063058	0.62491	0.926012	0.654026	0.121314	0.00871756	0.0354625	0.154876	3.77449			Zhejiang	1.97866	1.78207	0.879301	0.275934	0.228344	0.0475203	0.0477314	0.00712556	0.067059	0.106491	0.0689766	0.0120215	0.000968564	0.00515416	0.0178594	0.419799			Zhejiang	15.7644	14.1155	6.78343	2.31369	1.88008	0.433655	0.452953	0.0559324	0.557851	0.819521	0.58505
Anhui	78.2984	70.4094	34.9397	10.3746	8.76808	1.60245	2.04168	0.309935	2.43098	4.74706	2.37972	0.432454	0.0376806	0.230722	0.678706	17.8406			Anhui	29.3434	26.7277	14.021	3.53141	3.11878	0.409309	0.474314	0.114614	0.807792	1.81427	0.831385	0.111078	0.0141206	0.125411	0.270847	6.40141			Anhui	48.955	43.6817	20.9187	6.84319	5.6493	1.19314	1.56736	0.195321	1.62319	2.9328	1.54834
Fujian	13.7799	12.3542	5.90906	2.03887	1.65308	0.385796	0.386446	0.048577	0.498063	0.712387	0.506673	0.0960243	0.00679566	0.0261941	0.122227	2.92496			Fujian	3.28	2.93921	1.4088	0.485305	0.391833	0.0934701	0.0907419	0.011367	0.12045	0.164837	0.12387	0.023271	0.00161767	0.00610754	0.029307	0.687149			Fujian	10.4999	9.41498	4.50027	1.55356	1.26124	0.292326	0.295704	0.03721	0.377613	0.54755	0.382803
Jiangxi	18.2375	16.3109	7.86254	2.66464	2.15744	0.507237	0.523802	0.0640441	0.652061	0.927512	0.693638	0.128728	0.00894659	0.0344565	0.158619	3.84902			Jiangxi	7.00078	6.2731	3.00589	1.03642	0.836603	0.19981	0.193922	0.0242523	0.257283	0.351581	0.264587	0.0497396	0.00345299	0.0129846	0.0625463	1.46646			Jiangxi	11.2367	10.0378	4.85664	1.62823	1.32083	0.307427	0.32988	0.0397918	0.394778	0.575931	0.429051
Shandong	61.2215	54.9662	26.8719	7.46408	6.51348	0.944521	1.79571	0.288855	1.76087	4.58187	1.15276	0.292278	0.0285762	0.210035	0.524587	16.2054			Shandong	23.2577	21.233	11.2722	2.7081	2.42857	0.276521	0.338077	0.0922938	0.609989	1.4761	0.627902	0.0771453	0.0111526	0.107342	0.215646	5.10229			Shandong	37.9638	33.7332	15.5997	4.75598	4.0849	0.668	1.45764	0.196562	1.15089	3.10577	0.524857
Henan	70.9864	64.0759	31.6699	8.82125	7.68386	1.1303	1.80338	0.316841	2.07871	5.03821	1.49999	0.325877	0.0336229	0.253145	0.632266	17.8431			Henan	34.4028	31.4079	16.6738	4.00583	3.59235	0.40903	0.500083	0.136521	0.902296	2.18345	0.928794	0.114113	0.0164969	0.15878	0.318984	7.54731			Henan	36.5836	32.668	14.996	4.81542	4.09151	0.721271	1.30329	0.18032	1.17641	2.85476	0.571194
Hubei	22.1347	19.7552	9.67583	3.01415	2.4951	0.518531	0.667573	0.0858897	0.718875	1.27465	0.747562	0.141706	0.01062	0.052375	0.184151	5.01032			Hubei	4.70702	4.2602	2.15999	0.617425	0.524599	0.0925009	0.0973062	0.0175729	0.146543	0.269675	0.150768	0.0239244	0.0022872	0.0156672	0.0429023	1.01088			Hubei	17.4277	15.495	7.51584	2.39673	1.9705	0.42603	0.570266	0.0683168	0.572332	1.00498	0.596794
Hunan	77.7349	69.5027	33.3739	11.2343	9.13525	2.09858	2.28582	0.283571	2.74978	4.15333	2.79425	0.539291	0.0379489	0.152322	0.674349	16.9274			Hunan	20.7773	18.6203	8.92985	3.07091	2.48052	0.590364	0.573444	0.0720574	0.761907	1.04555	0.783542	0.147018	0.0102458	0.038975	0.185682	4.35381			Hunan	56.9576	50.8824	24.444	8.16335	6.65472	1.50822	1.71238	0.211513	1.98788	3.10779	2.01071
Guangdong	31.6209	28.3377	13.5091	4.646	3.76962	0.876188	0.897667	0.113951	1.14698	1.6765	1.12343	0.219879	0.0155403	0.0608591	0.281663	6.84146			Guangdong	13.6291	12.2121	5.85062	2.01842	1.62905	0.389373	0.37783	0.0472029	0.50112	0.684156	0.515346	0.09692	0.00672262	0.0252153	0.121758	2.85468			Guangdong	17.9917	16.1256	7.65848	2.62758	2.14057	0.486816	0.519837	0.0667478	0.645862	0.992342	0.608081
Guangxi	38.0021	34.0519	16.0928	5.49412	4.49185	1.00155	1.12157	0.146104	1.35678	2.19143	1.20282	0.255958	0.0185372	0.0775925	0.33813	8.67842			Guangxi	14.0247	12.5665	6.02031	2.07706	1.67636	0.400706	0.388822	0.0485719	0.515684	0.703986	0.530325	0.0997404	0.00691775	0.0259417	0.125291	2.93751			Guangxi	23.9774	21.4854	10.0724	3.41706	2.81549	0.600847	0.732744	0.0975318	0.8411	1.48744	0.672492
Hainan	4.3129	3.86501	1.84241	0.633625	0.514057	0.119541	0.12245	0.0155439	0.156515	0.22865	0.15321	0.0300037	0.00211947	0.00829673	0.038426	0.933269			Hainan	1.78004	1.59496	0.764079	0.263643	0.212775	0.0508679	0.0493575	0.00616456	0.0654576	0.0893438	0.0673159	0.0126614	0.000878023	0.00329101	0.0159019	0.372829			Hainan	2.53286	2.27005	1.07833	0.369982	0.301282	0.0686731	0.0730928	0.00937931	0.091057	0.139306	0.0858942
Chongqing	7.52151	6.74727	3.17131	1.06164	0.880603	0.180774	0.227723	0.0311088	0.258119	0.478928	0.201435	0.0472063	0.00363955	0.0172618	0.0666468	1.82115			Chongqing	0.289999	0.264754	0.140552	0.0337672	0.0302818	0.00344792	0.00421546	0.00115081	0.00760592	0.0184054	0.00782929	0.000961921	0.000139061	0.00133844	0.00268888	0.0636202			Chongqing	7.23151	6.48252	3.03076	1.02788	0.850321	0.177326	0.223507	0.029958	0.250513	0.460522	0.193606
Sichuan	24.4161	21.9346	10.4471	3.39665	2.82878	0.566822	0.699195	0.099637	0.825799	1.53304	0.670439	0.148174	0.0118129	0.0605987	0.21778	5.81448			Sichuan	3.05957	2.79323	1.48287	0.356253	0.319481	0.0363766	0.0444743	0.0121413	0.0802446	0.194182	0.0826012	0.0101485	0.00146713	0.0141209	0.0283685	0.671211			Sichuan	21.3565	19.1413	8.96424	3.0404	2.5093	0.530446	0.65472	0.0874956	0.745554	1.33886	0.587838
Guizhou	6.61673	5.93492	2.77514	0.915652	0.764544	0.150774	0.204396	0.0286904	0.224753	0.446008	0.155769	0.0402689	0.00317731	0.016062	0.0588775	1.66725			Guizhou	0.378686	0.34572	0.183536	0.0440938	0.0395425	0.00450236	0.00550463	0.00150274	0.00993195	0.0240341	0.0102236	0.00125609	0.000181588	0.00174776	0.00351119	0.0830764			Guizhou	6.23804	5.5892	2.5916	0.871558	0.725002	0.146272	0.198891	0.0271877	0.214821	0.421973	0.145546
Yunnan	13.8947	12.4714	5.82074	1.93004	1.61844	0.31095	0.434082	0.0607956	0.46275	0.952737	0.317437	0.082785	0.00668131	0.0340932	0.122446	3.52515			Yunnan	1.01561	0.921098	0.472256	0.129673	0.111498	0.0180901	0.0195183	0.00384818	0.0304381	0.0596729	0.031319	0.00473705	0.00049196	0.00369018	0.00929475	0.219226			Yunnan	12.8791	11.5503	5.34848	1.80036	1.50694	0.29286	0.414564	0.0569474	0.432312	0.893064	0.286118
Tibet	0.315293	0.287218	0.148753	0.0383154	0.034097	0.00418461	0.00573713	0.00129125	0.00836266	0.0208144	0.00799013	0.00114273	0.000151623	0.00133842	0.00285184	0.0718747			Tibet	0.191438	0.174772	0.0927832	0.0222908	0.01999	0.00227609	0.00278276	0.000759685	0.00502092	0.01215	0.00516837	0.000634995	9.17986e-05	0.000883549	0.00177502	0.0419978			Tibet	0.123855	0.112445	0.0559697	0.0160246	0.014107	0.00190852	0.00295437	0.000531566	0.00334174	0.00866441	0.00282177
Shannxi	15.3485	13.8059	6.60734	1.947	1.68585	0.25973	0.454013	0.0725532	0.46319	1.15916	0.267057	0.075804	0.00723048	0.0496063	0.135007	4.10128			Shannxi	4.56987	4.17205	2.21486	0.532111	0.477187	0.0543332	0.0664282	0.0181347	0.119856	0.290037	0.123376	0.0151582	0.00219135	0.0210915	0.042372	1.00254			Shannxi	10.7786	9.63389	4.39248	1.41489	1.20866	0.205397	0.387585	0.0544185	0.343334	0.869127	0.143681
Gansu	10.433	9.36755	4.45201	1.30647	1.1364	0.169059	0.327152	0.0511698	0.30988	0.820399	0.158165	0.0511823	0.00487714	0.033732	0.0904007	2.88188			Gansu	1.77709	1.62239	0.861293	0.206922	0.185564	0.0211286	0.025832	0.00705205	0.0466085	0.112787	0.0479772	0.00589457	0.000852153	0.00820186	0.0164772	0.389859			Gansu	8.65593	7.74516	3.59072	1.09955	0.95084	0.147931	0.30132	0.0441178	0.263272	0.707612	0.110187
Qinghai	0.631196	0.572698	0.285258	0.0791298	0.0698915	0.00917795	0.0148217	0.00279106	0.0173558	0.0453307	0.0130343	0.00254749	0.000301973	0.00241027	0.00560749	0.156301			Qinghai	0	0	0	0	0	0	0	0	0	0	0	0	0	0	0	0			Qinghai	0.631196	0.572698	0.285258	0.0791298	0.0698915	0.00917795	0.0148217	0.00279106	0.0173558	0.0453307	0.0130343
Ningxia	4.33522	3.89361	1.81651	0.572463	0.487309	0.0847979	0.13497	0.0204203	0.141112	0.324198	0.0747639	0.0237996	0.0020529	0.0122688	0.0388684	1.16799			Ningxia	0	0	0	0	0	0	0	0	0	0	0	0	0	0	0	0			Ningxia	4.33522	3.89361	1.81651	0.572463	0.487309	0.0847979	0.13497	0.0204203	0.141112	0.324198	0.0747639
Xinjiang	34.0874	29.4855	15.8295	3.41994	3.01774	0.401167	1.52252	0.161197	0.650903	2.3245	1.20677	0.197937	0.0147148	0.104105	0.174599	8.7607			Xinjiang	4.0441	3.69205	1.96003	0.47089	0.422286	0.048082	0.0587855	0.0160482	0.106066	0.256667	0.109181	0.0134142	0.00193923	0.0186648	0.037497	0.887197			Xinjiang	30.0433	25.7934	13.8695	2.94905	2.59545	0.353085	1.46374	0.145148	0.544837	2.06783	1.09759
	PM2.5	PM1.0	OC	EC	char-EC	soot-EC	SO42-	NO3-	NH4+	K+	WSOA	WSA	PAHs	Phenols	THM	WSI				PM2.5	PM1.0	OC	EC	char-EC	soot-EC	SO42-	NO3-	NH4+	K+	WSOA	WSA	PAHs	Phenols	THM	WSI				PM2.5	PM1.0	OC	EC	char-EC	soot-EC	SO42-	NO3-	NH4+	K+	WSOA
Nationwide	835.42	748.565	360.994	111.4	93.821	17.5345	24.9739	3.55043	26.6457	54.7508	21.9374	4.85211	0.398593	2.25178	7.18505	204.457			Nationwide	209.291	189.922	97.6742	26.5195	22.8801	3.62109	3.93777	0.796241	6.205	12.382	6.38478	0.951887	0.101292	0.778156	1.91757	45.2402			Nationwide	626.132	558.645	263.321	84.8805	70.9411	13.9135	21.0362	2.7542	20.4408	42.369	15.5527
2012 flux concentration of smoke PM2.5																			2012 summer harvest flux concentration of smoke PM2.5																			2012 autumn harvest flux concentration of smoke PM2.5
μg/m³/d	PM2.5	PM1.0	OC	EC	char-EC	soot-EC	SO42-	NO3-	NH4+	K+	WSOA	WSA	PAHs	Phenols	THM	WSI			μg/m³/d	PM2.5	PM1.0	OC	EC	char-EC	soot-EC	SO42-	NO3-	NH4+	K+	WSOA	WSA	PAHs	Phenols	THM	WSI			μg/m³/d	PM2.5	PM1.0	OC	EC	char-EC	soot-EC	SO42-	NO3-	NH4+	K+	WSOA
Beijing	1.72189	1.54673	0.714451	0.219825	0.189988	0.0296564	0.0557757	0.00873375	0.0543898	0.140794	0.0195647	0.00877827	0.000805216	0.00528187	0.0154618	0.494399			Beijing	0.639729	0.584039	0.310054	0.0744894	0.0668007	0.00760602	0.00929919	0.00253865	0.0167784	0.0406018	0.0172712	0.00212197	0.000306764	0.00295256	0.00593159	0.140344			Beijing	2.69584	2.41315	1.07841	0.350627	0.300856	0.0495017	0.0976045	0.0143093	0.08824	0.230966	0.0216289
Tianjin	4.03469	3.59573	1.74575	0.48938	0.424119	0.0649244	0.136432	0.0194752	0.114738	0.304834	0.079285	0.0211433	0.00186055	0.0125702	0.0325462	1.09323			Tianjin	1.82629	1.66731	0.88514	0.212652	0.190702	0.0217136	0.0265472	0.0072473	0.0478989	0.11591	0.0493056	0.00605778	0.000875747	0.00842895	0.0169335	0.400654			Tianjin	6.02225	5.33131	2.5203	0.738436	0.634195	0.103814	0.235328	0.0304803	0.174893	0.474865	0.106266
Hebei	4.27551	3.83247	1.85404	0.523633	0.455917	0.0672994	0.132135	0.0205828	0.124214	0.326633	0.0752982	0.020996	0.00198963	0.0141663	0.0363929	1.15601			Hebei	2.83895	2.59181	1.37594	0.330565	0.296444	0.0337535	0.0412674	0.0112659	0.0744583	0.18018	0.076645	0.00941675	0.00136134	0.0131027	0.0263229	0.622811			Hebei	5.56842	4.94907	2.28433	0.697394	0.599442	0.0974907	0.213916	0.028968	0.168994	0.458441	0.0740862
Shanxi	1.98103	1.77732	0.821892	0.252394	0.218168	0.0340262	0.0656466	0.0100666	0.0618897	0.162005	0.023298	0.0101842	0.000924622	0.0060069	0.0175262	0.569456			Shanxi	0.653823	0.596905	0.316885	0.0761304	0.0682724	0.00777359	0.00950405	0.00259457	0.0171481	0.0414963	0.0176517	0.00216872	0.000313522	0.00301761	0.00606227	0.143436			Shanxi	3.17552	2.83969	1.2764	0.411031	0.353074	0.0576536	0.116175	0.0167915	0.102157	0.270463	0.0283797
Inner Mongolia	0.329944	0.295702	0.132931	0.0436307	0.0374475	0.00615475	0.0117791	0.00170967	0.0105968	0.0276597	0.00328711	0.00179118	0.000154631	0.00089497	0.00290462	0.0972662			Inner Mongolia	0.000839617	0.000753792	0.00036524	0.000121592	9.90434e-05	2.25371e-05	2.21297e-05	2.95181e-06	2.99549e-05	4.33007e-05	3.08075e-05	5.64086e-06	4.1295e-07	1.79377e-06	7.53024e-06	0.000176724			Inner Mongolia	0.626216	0.561228	0.252279	0.082798	0.0710693	0.0116747	0.0223614	0.00324603	0.020109	0.0525195	0.0062199
Liaoning	2.56778	2.29953	1.04549	0.34535	0.291892	0.0532644	0.0876975	0.012497	0.0862475	0.198429	0.0388016	0.0150066	0.00121217	0.0065022	0.0228819	0.71768			Liaoning	0	0	0	0	0	0	0	0	0	0	0	0	0	0	0	0			Liaoning	4.87878	4.36912	1.98643	0.656166	0.554596	0.101202	0.166625	0.0237443	0.16387	0.377015	0.073723
Jilin	3.209	2.8737	1.30108	0.428268	0.363587	0.0644228	0.111426	0.0159824	0.106656	0.255138	0.0426758	0.0183917	0.00150966	0.00830524	0.0285332	0.914936			Jilin	0	0	0	0	0	0	0	0	0	0	0	0	0	0	0	0			Jilin	6.0971	5.46003	2.47205	0.81371	0.690815	0.122403	0.21171	0.0303665	0.202646	0.484763	0.081084
Heilongjiang	2.16089	1.93846	0.895617	0.299576	0.251923	0.0475466	0.0702083	0.00976916	0.0716555	0.154173	0.0444631	0.0127941	0.00103542	0.00526933	0.0189654	0.56493			Heilongjiang	0.00299864	0.0027376	0.00145334	0.000349159	0.000313119	3.56522e-05	4.35886e-05	1.18996e-05	7.86466e-05	0.000190315	8.09562e-05	9.94644e-06	1.43791e-06	1.38397e-05	2.78035e-05	0.000657844			Heilongjiang	4.103	3.68061	1.70036	0.568881	0.478372	0.0903065	0.133356	0.0185507	0.136075	0.292757	0.084407
Shanghai	7.92273	7.11424	3.4764	1.12043	0.921191	0.199068	0.208449	0.0286605	0.271788	0.425012	0.280708	0.0507461	0.00387385	0.0186309	0.070113	1.69659			Shanghai	2.76665	2.52581	1.3409	0.322146	0.288895	0.0328939	0.0402164	0.0109789	0.0725621	0.175592	0.0746931	0.00917693	0.00132667	0.012769	0.0256525	0.60695			Shanghai	12.5632	11.2438	5.39836	1.83889	1.49026	0.348625	0.359858	0.0445738	0.451092	0.649491	0.466121
Jiangsu	13.9543	12.5427	6.1912	1.90274	1.58834	0.313856	0.362348	0.0529394	0.452914	0.799612	0.457811	0.082298	0.00676532	0.0376564	0.122185	3.08361			Jiangsu	7.8132	7.13304	3.78679	0.909761	0.815857	0.0928946	0.113574	0.0310053	0.20492	0.495882	0.210938	0.0259163	0.0037466	0.0360605	0.0724443	1.71407			Jiangsu	19.4812	17.4114	8.35517	2.79642	2.28357	0.512721	0.586246	0.0726802	0.676109	1.07297	0.679997
Zhejiang	3.05043	2.73316	1.3174	0.445215	0.362486	0.082725	0.086079	0.0108411	0.107436	0.159203	0.112442	0.0208567	0.00149875	0.00609681	0.0266267	0.648921			Zhejiang	0.718151	0.6468	0.319141	0.10015	0.0828771	0.0172474	0.017324	0.00258621	0.0243389	0.0386508	0.0250349	0.00436319	0.000351539	0.00187069	0.00648202	0.152365			Zhejiang	5.14948	4.61089	2.21583	0.755774	0.614134	0.141655	0.147958	0.0182705	0.182224	0.267699	0.191108
Anhui	9.78409	8.79828	4.36603	1.2964	1.09565	0.20024	0.255126	0.0387292	0.303772	0.593188	0.297368	0.054039	0.00470853	0.0288308	0.0848104	2.22934			Anhui	7.74085	7.05082	3.69878	0.931594	0.822741	0.107977	0.125125	0.0302355	0.213097	0.478608	0.219321	0.0293027	0.00372503	0.0330837	0.07145	1.68871			Anhui	11.623	10.371	4.96656	1.62472	1.34127	0.283278	0.372127	0.0463734	0.38538	0.69631	0.367609
Fujian	1.9833	1.7781	0.850475	0.293448	0.237923	0.0555265	0.0556201	0.00699155	0.0716849	0.102532	0.072924	0.0138205	0.00097808	0.00377004	0.0175918	0.420982			Fujian	0.996615	0.893068	0.428058	0.147458	0.119057	0.0284005	0.0275716	0.00345383	0.0365983	0.0500852	0.0376375	0.00707081	0.000491524	0.00185575	0.00890483	0.208788			Fujian	2.87132	2.57464	1.23065	0.42484	0.344902	0.0799399	0.0808637	0.0101755	0.103263	0.149734	0.104682
Jiangxi	1.91244	1.71042	0.824493	0.279423	0.226236	0.0531906	0.0549277	0.00671589	0.0683773	0.097262	0.0727372	0.0134988	0.00093817	0.00361323	0.0166333	0.403622			Jiangxi	1.54982	1.38873	0.66544	0.22944	0.185206	0.0442337	0.0429302	0.00536893	0.0569568	0.0778324	0.0585738	0.0110113	0.000764418	0.00287452	0.0138464	0.324642			Jiangxi	2.2388	1.99994	0.96764	0.324409	0.263164	0.0612519	0.0657255	0.00792814	0.0786558	0.114749	0.0854843
Shandong	7.0007	6.28541	3.07281	0.853521	0.744818	0.108006	0.20534	0.0330307	0.201357	0.523938	0.131818	0.0334221	0.0032677	0.0240175	0.0599867	1.8531			Shandong	5.61455	5.12579	2.72118	0.653752	0.586273	0.0667538	0.0816138	0.0222803	0.147255	0.35634	0.15158	0.0186234	0.0026923	0.025913	0.0520583	1.23172			Shandong	8.24823	7.32906	3.38928	1.03331	0.887509	0.145133	0.316694	0.0427061	0.250048	0.674777	0.114033
Henan	7.52038	6.78828	3.35514	0.934533	0.814037	0.119745	0.191052	0.0335665	0.220221	0.533754	0.158911	0.0345238	0.00356205	0.0268184	0.066983	1.89032			Henan	7.69431	7.02449	3.72916	0.895917	0.803442	0.091481	0.111845	0.0305334	0.201802	0.488336	0.207728	0.0255219	0.00368959	0.0355118	0.0713419	1.68798			Henan	7.36385	6.57568	3.01852	0.969288	0.823572	0.145183	0.262338	0.0362963	0.236798	0.574629	0.114975
Hubei	2.08596	1.86171	0.911843	0.284052	0.235136	0.0488659	0.0629115	0.00809418	0.0677462	0.120122	0.0704497	0.0133543	0.00100082	0.00493578	0.0173543	0.472169			Hubei	0.936459	0.847564	0.429729	0.122836	0.104369	0.018403	0.019359	0.00349611	0.0291546	0.0536517	0.0299951	0.00475976	0.000455036	0.00311698	0.0085354	0.201115			Hubei	3.1205	2.77444	1.34575	0.429145	0.352827	0.0762826	0.102109	0.0122324	0.102479	0.179946	0.106859
Hunan	6.42022	5.74031	2.75639	0.927851	0.754491	0.173325	0.188789	0.0234204	0.227108	0.343029	0.230781	0.0445407	0.00313424	0.0125805	0.0556953	1.39805			Hunan	3.62272	3.24663	1.557	0.535442	0.432502	0.102935	0.0999852	0.0125639	0.132845	0.182301	0.136618	0.025634	0.00178645	0.00679564	0.0323754	0.759127			Hunan	8.93798	7.98463	3.83584	1.28102	1.04428	0.236675	0.268712	0.0331913	0.311944	0.487684	0.315527
Guangdong	3.13271	2.80744	1.33836	0.460283	0.373459	0.0868047	0.0889326	0.0112892	0.113632	0.166092	0.111299	0.0217836	0.00153959	0.00602936	0.0279046	0.677789			Guangdong	2.85053	2.55416	1.22365	0.422152	0.340715	0.0814371	0.0790231	0.00987247	0.104809	0.143091	0.107784	0.0202708	0.00140603	0.00527377	0.0254655	0.597054			Guangdong	3.38667	3.0354	1.44159	0.494602	0.40293	0.0916355	0.0978512	0.0125642	0.121574	0.186793	0.114462
Guangxi	2.81534	2.5227	1.19221	0.407026	0.332773	0.0741989	0.0830899	0.0108239	0.100516	0.162349	0.0891092	0.0189623	0.0013733	0.00574834	0.02505	0.64293			Guangxi	2.19345	1.96539	0.941572	0.324851	0.262181	0.0626701	0.0608115	0.0075966	0.0806526	0.110103	0.0829423	0.0155993	0.00108193	0.00405725	0.0195954	0.459424			Guangxi	3.37503	3.02427	1.41779	0.480983	0.396307	0.0845747	0.10314	0.0137285	0.118393	0.209371	0.0946595
Hainan	2.22682	1.99556	0.951264	0.32715	0.265415	0.0617208	0.0632229	0.00802553	0.0808108	0.118055	0.0791046	0.0154914	0.00109431	0.00428372	0.0198399	0.48186			Hainan	1.94024	1.7385	0.832844	0.28737	0.231924	0.0554459	0.0537996	0.00671935	0.0713487	0.0973845	0.0733742	0.0138009	0.000957043	0.00358719	0.0173331	0.406383			Hainan	2.48473	2.22692	1.05784	0.362952	0.295557	0.0673681	0.0717039	0.00920108	0.0893267	0.136659	0.084262
Chongqing	1.59871	1.43415	0.67407	0.225655	0.187174	0.0384239	0.048403	0.00661224	0.0548638	0.101797	0.0428155	0.0100338	0.000773596	0.00366904	0.0141659	0.387089			Chongqing	0.130129	0.118801	0.0630689	0.0151521	0.0135881	0.00154716	0.00189157	0.000516392	0.00341294	0.00825891	0.00351317	0.000431635	6.23996e-05	0.000600588	0.00120656	0.0285478			Chongqing	2.92044	2.61796	1.22397	0.415107	0.343402	0.071613	0.0902634	0.0120985	0.10117	0.185982	0.0781877
Sichuan	0.88446	0.794567	0.378441	0.123042	0.102471	0.0205328	0.0253279	0.00360929	0.0299141	0.0555336	0.0242863	0.0053675	0.000427915	0.00219515	0.00788896	0.210626			Sichuan	0.233977	0.213609	0.113401	0.027244	0.024432	0.00278186	0.00340112	0.000928495	0.00613661	0.0148499	0.00631683	0.000776098	0.000112197	0.00107988	0.00216944	0.0513301			Sichuan	1.46989	1.31743	0.616977	0.20926	0.172706	0.0365087	0.0450621	0.00602201	0.0513139	0.0921489	0.0404588
Guizhou	0.658619	0.590753	0.276233	0.0911426	0.0761016	0.0150078	0.0203453	0.0028558	0.0223716	0.0443949	0.0155051	0.00400831	0.000316264	0.00159879	0.00586058	0.165955			Guizhou	0.0795758	0.0726485	0.0385676	0.00926573	0.00830933	0.000946112	0.00115672	0.000315782	0.00208707	0.00505046	0.00214836	0.000263952	3.81583e-05	0.000367269	0.00073783	0.0174574			Guizhou	1.17976	1.05705	0.490132	0.164832	0.137115	0.0276634	0.0376149	0.00514181	0.0406277	0.0798049	0.0275261
Yunnan	0.634844	0.569815	0.265948	0.0881829	0.0739461	0.0142072	0.0198331	0.00277773	0.0211429	0.0435303	0.0145036	0.00378243	0.000305267	0.00155771	0.00559453	0.161063			Yunnan	0.097962	0.0888456	0.045552	0.0125078	0.0107547	0.0017449	0.00188266	0.00037118	0.00293594	0.00575582	0.00302091	0.000456918	4.74525e-05	0.000355941	0.000896536	0.0211457			Yunnan	1.11804	1.00269	0.464304	0.15629	0.130818	0.0254233	0.0359885	0.00494363	0.0375292	0.0775274	0.0248381
Tibet	0.00459232	0.0041834	0.00216662	0.000558074	0.000496632	6.09499e-05	8.35627e-05	1.88074e-05	0.000121804	0.000303167	0.000116378	1.66442e-05	2.20842e-06	1.94944e-05	4.15377e-05	0.00104687			Tibet	0.00588649	0.00537406	0.00285298	0.000685417	0.000614669	6.99871e-05	8.55668e-05	2.33595e-05	0.000154387	0.000373599	0.000158921	1.95254e-05	2.8227e-06	2.71681e-05	5.45798e-05	0.00129138			Tibet	0.00342757	0.00311181	0.0015489	0.000443464	0.000390398	5.28165e-05	8.17591e-05	1.47106e-05	9.24793e-05	0.000239779	7.80895e-05
Shannxi	1.30778	1.17635	0.562983	0.165896	0.143644	0.0221305	0.0386845	0.00618195	0.0394664	0.0987673	0.0227548	0.00645894	0.000616078	0.00422674	0.0115033	0.349452			Shannxi	0.822022	0.750463	0.398406	0.0957154	0.0858358	0.00977338	0.011949	0.00326204	0.0215595	0.0521714	0.0221927	0.00272663	0.000394177	0.0037939	0.00762182	0.180336			Shannxi	1.74496	1.55964	0.711103	0.229058	0.195671	0.0332519	0.0627465	0.00880986	0.0555827	0.140704	0.0232606
Gansu	0.45199	0.40583	0.192874	0.0566004	0.0492324	0.00732416	0.0141732	0.00221683	0.0134249	0.0355421	0.00685217	0.00221737	0.000211292	0.00146137	0.00391643	0.124852			Gansu	0.162532	0.148383	0.0787736	0.018925	0.0169716	0.00193241	0.00236259	0.000644978	0.00426279	0.0103154	0.00438798	0.000539115	7.79376e-05	0.000750139	0.001507	0.0356564			Gansu	0.712502	0.637533	0.295565	0.0905082	0.0782671	0.0121767	0.0248027	0.0036315	0.0216709	0.0582461	0.00906993
Qinghai	0.0154749	0.0140407	0.00699359	0.00194001	0.00171351	0.000225013	0.00036338	6.84276e-05	0.000425507	0.00111136	0.000319558	6.24562e-05	7.40339e-06	5.90918e-05	0.000137477	0.00383198			Qinghai	0	0	0	0	0	0	0	0	0	0	0	0	0	0	0	0			Qinghai	0.0294022	0.0266773	0.0132878	0.00368601	0.00325567	0.000427526	0.000690422	0.000130012	0.000808464	0.00211159	0.00060716
Ningxia	1.46677	1.31736	0.614596	0.193686	0.164875	0.0286904	0.0456654	0.00690895	0.0477437	0.109689	0.0252955	0.00805232	0.000694574	0.00415099	0.0131507	0.395176			Ningxia	0	0	0	0	0	0	0	0	0	0	0	0	0	0	0	0			Ningxia	2.78686	2.50298	1.16773	0.368004	0.313263	0.0545117	0.0867642	0.013127	0.090713	0.208408	0.0480614
Xinjiang	0.366149	0.316718	0.170033	0.0367353	0.032415	0.00430913	0.0163542	0.00173149	0.00699167	0.0249686	0.0129625	0.00212613	0.000158059	0.00111825	0.00187545	0.094103			Xinjiang	0.0917059	0.0837226	0.0444466	0.0106781	0.00957595	0.00109033	0.00133305	0.000363918	0.00240521	0.00582031	0.00247584	0.000304187	4.3975e-05	0.000423253	0.0008503	0.0201185			Xinjiang	0.613148	0.526413	0.28306	0.0601867	0.0529702	0.00720605	0.0298732	0.00296231	0.0111195	0.042202	0.0224006
	PM2.5	PM1.0	OC	EC	char-EC	soot-EC	SO42-	NO3-	NH4+	K+	WSOA	WSA	PAHs	Phenols	THM	WSI				PM2.5	PM1.0	OC	EC	char-EC	soot-EC	SO42-	NO3-	NH4+	K+	WSOA	WSA	PAHs	Phenols	THM	WSI				PM2.5	PM1.0	OC	EC	char-EC	soot-EC	SO42-	NO3-	NH4+	K+	WSOA
Nationwide	1.55096	1.38971	0.670186	0.206814	0.174179	0.0325529	0.046364	0.00659138	0.0494678	0.101645	0.0407267	0.00900795	0.000739988	0.00418043	0.0133391	0.379574			Nationwide	0.820269	0.744359	0.382812	0.103937	0.0896735	0.0141921	0.0154332	0.00312069	0.0243191	0.0485284	0.0250237	0.00373071	0.000396992	0.00304981	0.00751549	0.177309			Nationwide	2.20859	1.97054	0.928826	0.299403	0.250234	0.0490777	0.0742019	0.00971504	0.0721019	0.14945	0.0548597
[truncated: 5 more columns]

## Sheet: EM-1
2012 total emission from filed burning																			2012 summer harvest emission from filed burning																			2012 autumn harvest emission from filed burning
Gg	PM2.5	PM1.0	OC	EC	char-EC	soot-EC	SO42-	NO3-	NH4+	K+	WSOA	WSA	PAHs	Phenols	THM	WSI			Gg	PM2.5	PM1.0	OC	EC	char-EC	soot-EC	SO42-	NO3-	NH4+	K+	WSOA	WSA	PAHs	Phenols	THM	WSI			Gg	PM2.5	PM1.0	OC	EC	char-EC	soot-EC	SO42-	NO3-	NH4+	K+	WSOA
Beijing	0	0	0	0	0	0	0	0	0	0	0	0	0	0	0	0			Beijing	0	0	0	0	0	0	0	0	0	0	0	0	0	0	0	0			Beijing	0	0	0	0	0	0	0	0	0	0	0
Tianjin	0	0	0	0	0	0	0	0	0	0	0	0	0	0	0	0			Tianjin	0	0	0	0	0	0	0	0	0	0	0	0	0	0	0	0			Tianjin	0	0	0	0	0	0	0	0	0	0	0
Hebei	58.9906	52.8779	25.5808	7.22473	6.29043	0.928552	1.82311	0.283987	1.71382	4.50666	1.03891	0.289688	0.0274515	0.195457	0.502124	15.9499			Hebei	18.5542	16.939	8.99256	2.16043	1.93743	0.220599	0.269706	0.0736288	0.486628	1.17758	0.500919	0.0615438	0.00889713	0.0856337	0.172035	4.07043			Hebei	40.4365	35.9389	16.5882	5.0643	4.353	0.707953	1.5534	0.210358	1.22719	3.32908	0.537995
Shanxi	16.6196	14.9106	6.89517	2.11743	1.83029	0.285459	0.550735	0.0844528	0.519216	1.35912	0.195456	0.0854389	0.007757	0.0503942	0.147034	4.77738			Shanxi	2.59824	2.37205	1.25928	0.302536	0.271309	0.0308916	0.0377683	0.0103106	0.068145	0.164903	0.0701463	0.0086183	0.00124591	0.0119917	0.024091	0.570003			Shanxi	14.0214	12.5386	5.63589	1.81489	1.55898	0.254567	0.512966	0.0741422	0.451071	1.19422	0.125309
Inner Mongolia	0.00269861	0.00246369	0.00130792	0.000314224	0.00028179	3.2085e-05	3.92274e-05	1.0709e-05	7.07777e-05	0.000171273	7.28562e-05	8.95125e-06	1.29404e-06	1.2455e-05	2.50217e-05	0.000592024			Inner Mongolia	0.00269861	0.00246369	0.00130792	0.000314224	0.00028179	3.2085e-05	3.92274e-05	1.0709e-05	7.07777e-05	0.000171273	7.28562e-05	8.95125e-06	1.29404e-06	1.2455e-05	2.50217e-05	0.000592024			Inner Mongolia	0.00269861	0.00246369	0.00130792	0.000314224	0.00028179	3.2085e-05	3.92274e-05	1.0709e-05	7.07777e-05	0.000171273	7.28562e-05
Liaoning	28.3476	25.3863	11.5419	3.81259	3.22242	0.588026	0.968159	0.137964	0.952152	2.19061	0.42836	0.16567	0.0133821	0.0717828	0.252611	7.92301			Liaoning	0	0	0	0	0	0	0	0	0	0	0	0	0	0	0	0			Liaoning	28.3476	25.3863	11.5419	3.81259	3.22242	0.588026	0.968159	0.137964	0.952152	2.19061	0.42836
Jilin	81.3223	72.8251	32.9719	10.8532	9.214	1.6326	2.82376	0.405025	2.70286	6.4657	1.08149	0.466081	0.0382576	0.210471	0.723087	23.1863			Jilin	0	0	0	0	0	0	0	0	0	0	0	0	0	0	0	0			Jilin	81.3223	72.8251	32.9719	10.8532	9.214	1.6326	2.82376	0.405025	2.70286	6.4657	1.08149
Heilongjiang	230.985	207.208	95.7352	32.0226	26.9288	5.0824	7.50477	1.04426	7.65948	16.48	4.75279	1.3676	0.110679	0.563255	2.02727	60.3871			Heilongjiang	0.151832	0.138614	0.0735876	0.0176791	0.0158543	0.0018052	0.00220705	0.000602517	0.00398216	0.00963634	0.0040991	0.000503623	7.28067e-05	0.000700754	0.00140779	0.033309			Heilongjiang	230.833	207.069	95.6616	32.0049	26.9129	5.0806	7.50257	1.04365	7.65549	16.4704	4.7487
Shanghai	0	0	0	0	0	0	0	0	0	0	0	0	0	0	0	0			Shanghai	0	0	0	0	0	0	0	0	0	0	0	0	0	0	0	0			Shanghai	0	0	0	0	0	0	0	0	0	0	0
Jiangsu	80.2965	72.174	35.6258	10.9489	9.13971	1.80601	2.08505	0.304628	2.60619	4.60118	2.63437	0.473564	0.0389294	0.216685	0.703083	17.7439			Jiangsu	21.2965	19.4426	10.3217	2.47974	2.22378	0.253203	0.309568	0.0845112	0.558552	1.35163	0.574955	0.07064	0.0102121	0.0982903	0.197462	4.67204			Jiangsu	59	52.7314	25.3041	8.46912	6.91592	1.55281	1.77548	0.220116	2.04764	3.24955	2.05941
Zhejiang	35.486	31.7952	15.3255	5.17924	4.21685	0.962351	1.00137	0.126116	1.24982	1.85202	1.30805	0.242629	0.0174351	0.070925	0.309752	7.54898			Zhejiang	3.95732	3.56415	1.7586	0.551869	0.456688	0.0950405	0.0954627	0.0142511	0.134118	0.212982	0.137953	0.024043	0.00193713	0.0103083	0.0357187	0.839599			Zhejiang	31.5287	28.2311	13.5669	4.62738	3.76016	0.86731	0.905905	0.111865	1.1157	1.63904	1.1701
Anhui	51.3833	46.2062	22.9292	6.80833	5.75405	1.05161	1.33985	0.203395	1.59533	3.11526	1.56169	0.283798	0.0247279	0.151411	0.445401	11.7079			Anhui	19.2566	17.54	9.2013	2.31749	2.0467	0.268609	0.311269	0.0752157	0.530114	1.19061	0.545596	0.0728953	0.00926661	0.0823009	0.177743	4.20093			Anhui	32.1267	28.6661	13.7279	4.49084	3.70735	0.782998	1.02858	0.128179	1.06522	1.92465	1.0161
Fujian	16.7943	15.0567	7.20167	2.48487	2.01469	0.470189	0.470981	0.0592032	0.607015	0.868222	0.617508	0.11703	0.00828221	0.0319241	0.148964	3.5648			Fujian	3.9975	3.58216	1.71697	0.591466	0.477547	0.113917	0.110592	0.0138536	0.146799	0.200896	0.150967	0.0283615	0.00197154	0.00744356	0.0357179	0.837462			Fujian	12.7968	11.4745	5.4847	1.8934	1.53714	0.356272	0.360389	0.0453497	0.460216	0.667326	0.466541
Jiangxi	33.159	29.6562	14.2955	4.8448	3.92261	0.92225	0.952368	0.116444	1.18556	1.68638	1.26116	0.234051	0.0162665	0.0626482	0.288398	6.99822			Jiangxi	12.7287	11.4056	5.46526	1.88439	1.5211	0.363291	0.352586	0.0440951	0.467786	0.639238	0.481067	0.0904356	0.00627817	0.0236084	0.11372	2.66629			Jiangxi	20.4303	18.2505	8.83026	2.96041	2.40152	0.558958	0.599782	0.0723488	0.717778	1.04715	0.780093
Shandong	144.051	129.332	63.228	17.5626	15.3258	2.2224	4.22521	0.67966	4.14323	10.7809	2.71238	0.687712	0.067238	0.494199	1.23432	38.1304			Shandong	54.724	49.9601	26.5228	6.372	5.71429	0.650637	0.795475	0.217162	1.43527	3.47318	1.47742	0.181518	0.0262413	0.252569	0.507403	12.0054			Shandong	89.3266	79.3722	36.7052	11.1906	9.61154	1.57176	3.42973	0.462498	2.70797	7.30769	1.23496
Henan	96.0404	86.691	42.8475	11.9346	10.3958	1.52923	2.43986	0.428668	2.81237	6.8164	2.0294	0.440892	0.0454899	0.34249	0.855419	24.1407			Henan	46.545	42.4931	22.5587	5.41965	4.86024	0.553393	0.676584	0.184705	1.22075	2.95408	1.2566	0.154389	0.0223193	0.21482	0.431567	10.2111			Henan	49.4954	44.1979	20.2887	6.51498	5.53557	0.975837	1.76328	0.243962	1.59162	3.86232	0.772792
Hubei	42.2571	37.7144	18.472	5.75429	4.76337	0.989922	1.27446	0.163971	1.3724	2.43343	1.42716	0.270529	0.0202745	0.0999887	0.351561	9.56517			Hubei	8.98612	8.1331	4.12362	1.17872	1.00151	0.176593	0.185766	0.0335482	0.279763	0.514834	0.287829	0.0456739	0.00436646	0.0299101	0.0819044	1.92987			Hubei	33.271	29.5813	14.3484	4.57557	3.76186	0.81333	1.08869	0.130423	1.09263	1.9186	1.13933
Hunan	51.8233	46.3351	22.2493	7.48951	6.09016	1.39906	1.52388	0.189047	1.83319	2.76889	1.86283	0.359527	0.0252993	0.101548	0.449566	11.2849			Hunan	13.8515	12.4136	5.95323	2.04728	1.65368	0.393576	0.382296	0.0480383	0.507938	0.697031	0.522361	0.0980123	0.00683055	0.0259833	0.123788	2.90254			Hunan	37.9717	33.9216	16.296	5.44223	4.43648	1.00548	1.14158	0.141009	1.32525	2.07186	1.34047
Guangdong	42.1612	37.7836	18.0121	6.19467	5.02616	1.16825	1.19689	0.151934	1.52931	2.23533	1.4979	0.293172	0.0207204	0.0811455	0.375551	9.12194			Guangdong	18.1722	16.2828	7.80083	2.69123	2.17206	0.519164	0.503774	0.0629373	0.66816	0.912208	0.687128	0.129227	0.00896349	0.0336204	0.162343	3.80624			Guangdong	23.989	21.5008	10.2113	3.50344	2.8541	0.649088	0.693116	0.088997	0.861149	1.32312	0.810775
Guangxi	28.7894	25.7969	12.1915	4.16221	3.40292	0.758752	0.849671	0.110685	1.02787	1.66017	0.911225	0.193907	0.0140433	0.0587822	0.256159	6.57456			Guangxi	10.6248	9.52007	4.56084	1.57353	1.26997	0.303565	0.294562	0.0367969	0.39067	0.533323	0.401761	0.0755609	0.00524072	0.0196528	0.0949172	2.22539			Guangxi	18.1647	16.2768	7.63063	2.58868	2.13295	0.455187	0.555109	0.0738877	0.637197	1.12685	0.509464
Hainan	6.66539	5.97319	2.84736	0.979238	0.794452	0.184745	0.189241	0.0240223	0.241886	0.353368	0.236779	0.0463694	0.00327554	0.0128222	0.0593856	1.44232			Hainan	2.75098	2.46493	1.18085	0.407448	0.328834	0.078614	0.0762798	0.00952704	0.101162	0.138077	0.104034	0.0195676	0.00135694	0.0050861	0.0245757	0.57619			Hainan	3.91442	3.50826	1.66651	0.57179	0.465617	0.106131	0.112962	0.0144953	0.140724	0.215291	0.132746
Chongqing	16.4106	14.7213	6.91923	2.31631	1.92132	0.394416	0.49685	0.0678737	0.563168	1.04493	0.439495	0.102995	0.00794084	0.0376622	0.145411	3.97341			Chongqing	0.632725	0.577644	0.30666	0.0736738	0.0660693	0.00752274	0.00919737	0.00251085	0.0165947	0.0401573	0.0170821	0.00209874	0.000303405	0.00292024	0.00586665	0.138808			Chongqing	15.7778	14.1437	6.61257	2.24264	1.85525	0.386893	0.487653	0.0653628	0.546574	1.00478	0.422413
Sichuan	57.7108	51.8453	24.6932	8.02845	6.6862	1.33976	1.65264	0.235506	1.95189	3.62355	1.58467	0.350228	0.0279213	0.143233	0.514753	13.7433			Sichuan	7.23171	6.60217	3.50496	0.842053	0.755138	0.085981	0.105121	0.0286977	0.189669	0.458977	0.195239	0.0239875	0.00346776	0.0333768	0.0670527	1.5865			Sichuan	50.4791	45.2431	21.1882	7.1864	5.93106	1.25378	1.54752	0.206808	1.76222	3.16458	1.38943
Guizhou	18.6471	16.7257	7.82084	2.58047	2.15462	0.424909	0.576025	0.0808548	0.633396	1.25693	0.438987	0.113485	0.00895423	0.0452657	0.165927	4.69861			Guizhou	1.06721	0.974302	0.517237	0.124264	0.111438	0.0126885	0.015513	0.00423501	0.02799	0.0677325	0.028812	0.0035399	0.000511748	0.00492551	0.00989517	0.234124			Guizhou	17.5799	15.7514	7.3036	2.45621	2.04319	0.412221	0.560512	0.0766197	0.605405	1.1892	0.410175
Yunnan	30.3156	27.2103	12.6998	4.21099	3.53114	0.678436	0.947088	0.132645	1.00964	2.0787	0.692591	0.180622	0.0145774	0.0743852	0.267155	7.69123			Yunnan	2.21588	2.00967	1.03038	0.282923	0.243269	0.0394693	0.0425853	0.00839602	0.0664104	0.130195	0.0683325	0.0103354	0.00107337	0.00805131	0.0202795	0.478311			Yunnan	28.0998	25.2007	11.6694	3.92807	3.28787	0.638967	0.904503	0.124249	0.943226	1.9485	0.624258
Tibet	0	0	0	0	0	0	0	0	0	0	0	0	0	0	0	0			Tibet	0	0	0	0	0	0	0	0	0	0	0	0	0	0	0	0			Tibet	0	0	0	0	0	0	0	0	0	0	0
Shannxi	22.5713	20.3029	9.71667	2.86324	2.47919	0.381956	0.667667	0.106696	0.681162	1.70465	0.39273	0.111476	0.0106331	0.0729505	0.198539	6.03129			Shannxi	6.72039	6.13536	3.25714	0.782516	0.701745	0.0799017	0.0976885	0.0266686	0.176259	0.426525	0.181435	0.0222914	0.00322257	0.0310168	0.0623117	1.47433			Shannxi	15.8509	14.1675	6.45953	2.08073	1.77744	0.302054	0.569978	0.0800272	0.504903	1.27813	0.211296
Gansu	5.86858	5.26925	2.50426	0.734892	0.639227	0.0950959	0.184023	0.028783	0.174308	0.461474	0.0889676	0.02879	0.00274339	0.0189743	0.0508504	1.62106			Gansu	0.999613	0.912593	0.484477	0.116394	0.10438	0.0118848	0.0145305	0.00396678	0.0262173	0.0634426	0.0269872	0.0033157	0.000479336	0.00461354	0.00926845	0.219296			Gansu	4.86896	4.35665	2.01978	0.618498	0.534847	0.083211	0.169492	0.0248163	0.14809	0.398032	0.0619804
Qinghai	0	0	0	0	0	0	0	0	0	0	0	0	0	0	0	0			Qinghai	0	0	0	0	0	0	0	0	0	0	0	0	0	0	0	0			Qinghai	0	0	0	0	0	0	0	0	0	0	0
Ningxia	2.43856	2.19016	1.02179	0.32201	0.274111	0.0476988	0.0759204	0.0114864	0.0793757	0.182361	0.0420547	0.0133873	0.00115476	0.00690117	0.0218635	0.656994			Ningxia	0	0	0	0	0	0	0	0	0	0	0	0	0	0	0	0			Ningxia	2.43856	2.19016	1.02179	0.32201	0.274111	0.0476988	0.0759204	0.0114864	0.0793757	0.182361	0.0420547
Xinjiang	12.7828	11.057	5.93607	1.28248	1.13165	0.150438	0.570947	0.0604487	0.244089	0.871687	0.45254	0.0742262	0.00551805	0.0390395	0.0654746	3.28526			Xinjiang	1.51654	1.38452	0.735012	0.176584	0.158357	0.0180308	0.0220446	0.00601809	0.0397748	0.0962503	0.0409429	0.00503032	0.000727212	0.00699932	0.0140614	0.332699			Xinjiang	11.2662	9.67253	5.20106	1.10589	0.973295	0.132407	0.548902	0.0544306	0.204314	0.775436	0.411597
	PM2.5	PM1.0	OC	EC	char-EC	soot-EC	SO42-	NO3-	NH4+	K+	WSOA	WSA	PAHs	Phenols	THM	WSI				PM2.5	PM1.0	OC	EC	char-EC	soot-EC	SO42-	NO3-	NH4+	K+	WSOA	WSA	PAHs	Phenols	THM	WSI				PM2.5	PM1.0	OC	EC	char-EC	soot-EC	SO42-	NO3-	NH4+	K+	WSOA
Nationwide	1211.92	1087.05	519.263	162.713	137.15	25.4946	36.3906	5.23776	39.0888	81.3981	29.6896	6.99288	0.578954	3.25435	10.5597	301.749			Nationwide	258.582	234.85	121.327	32.3942	28.0917	4.27841	4.71062	0.989687	7.54282	15.4537	7.76174	1.1316	0.124987	0.993836	2.37315	56.0114			Nationwide	953.34	852.199	397.937	130.319	109.059	21.2162	31.68	4.24808	31.546	65.9446	21.9279
2012 flux concentration of smoke PM2.5																			2012 summer harvest flux concentration of smoke PM2.5																			2012 autumn harvest flux concentration of smoke PM2.5
μg/m³/d	PM2.5	PM1.0	OC	EC	char-EC	soot-EC	SO42-	NO3-	NH4+	K+	WSOA	WSA	PAHs	Phenols	THM	WSI			μg/m³/d	PM2.5	PM1.0	OC	EC	char-EC	soot-EC	SO42-	NO3-	NH4+	K+	WSOA	WSA	PAHs	Phenols	THM	WSI			μg/m³/d	PM2.5	PM1.0	OC	EC	char-EC	soot-EC	SO42-	NO3-	NH4+	K+	WSOA
Beijing	0	0	0	0	0	0	0	0	0	0	0	0	0	0	0	0			Beijing	0	0	0	0	0	0	0	0	0	0	0	0	0	0	0	0			Beijing	0	0	0	0	0	0	0	0	0	0	0
Tianjin	0	0	0	0	0	0	0	0	0	0	0	0	0	0	0	0			Tianjin	0	0	0	0	0	0	0	0	0	0	0	0	0	0	0	0			Tianjin	0	0	0	0	0	0	0	0	0	0	0
Hebei	5.53302	4.95967	2.39935	0.677643	0.59001	0.0870934	0.170998	0.0266365	0.160747	0.422702	0.0974448	0.0271713	0.00257481	0.0183328	0.0470967	1.49602			Hebei	3.67394	3.35411	1.78063	0.427789	0.383634	0.043681	0.0534048	0.0145793	0.0963579	0.233174	0.0991876	0.0121864	0.00176173	0.0169564	0.0340649	0.805991			Hebei	7.20619	6.40468	2.95619	0.90251	0.775749	0.126164	0.276832	0.037488	0.218698	0.593277	0.0958762
Shanxi	1.8645	1.67277	0.773545	0.237547	0.205334	0.0320247	0.0617851	0.00947447	0.0582491	0.152475	0.0219275	0.00958511	0.000870232	0.00565355	0.0164952	0.535958			Shanxi	0.615363	0.561793	0.298245	0.0716522	0.0642563	0.00731632	0.00894499	0.00244195	0.0161394	0.0390553	0.0166133	0.00204115	0.00029508	0.0028401	0.00570567	0.134999			Shanxi	2.98873	2.67265	1.20132	0.386853	0.332305	0.0542622	0.109341	0.0158037	0.0961479	0.254553	0.0267103
Inner Mongolia	4.13429e-05	3.77439e-05	2.00375e-05	4.81393e-06	4.31704e-06	4.91544e-07	6.00966e-07	1.64062e-07	1.08432e-06	2.62392e-06	1.11616e-06	1.37134e-07	1.98248e-08	1.90811e-07	3.83333e-07	9.06984e-06			Inner Mongolia	8.72795e-05	7.96816e-05	4.23013e-05	1.01627e-05	9.11375e-06	1.0377e-06	1.26871e-06	3.46353e-07	2.28912e-06	5.53939e-06	2.35634e-06	2.89504e-07	4.18524e-08	4.02824e-07	8.09259e-07	1.91474e-05			Inner Mongolia	7.85516e-05	7.17134e-05	3.80712e-05	9.14646e-06	8.20238e-06	9.33934e-07	1.14184e-06	3.11717e-07	2.0602e-06	4.98545e-06	2.12071e-06
Liaoning	3.4237	3.06605	1.39398	0.460467	0.38919	0.0710192	0.11693	0.0166627	0.114997	0.264572	0.0517355	0.0200088	0.00161623	0.00866961	0.0305092	0.956906			Liaoning	0	0	0	0	0	0	0	0	0	0	0	0	0	0	0	0			Liaoning	6.50504	5.82549	2.64857	0.874888	0.739461	0.134936	0.222167	0.031659	0.218494	0.502687	0.0982974
Jilin	7.48767	6.7053	3.03585	0.999293	0.848369	0.15032	0.259994	0.0372922	0.248863	0.595323	0.0995768	0.0429139	0.00352253	0.0193789	0.0665775	2.13485			Jilin	0	0	0	0	0	0	0	0	0	0	0	0	0	0	0	0			Jilin	14.2266	12.7401	5.76812	1.89866	1.6119	0.285608	0.493989	0.0708553	0.47284	1.13111	0.189196
Heilongjiang	9.00372	8.07692	3.73174	1.24823	1.04968	0.198111	0.292534	0.0407049	0.298565	0.642387	0.185263	0.0533087	0.00431426	0.0219555	0.0790225	2.35387			Heilongjiang	0.0124943	0.0114067	0.00605557	0.00145483	0.00130466	0.000148551	0.000181619	4.95815e-05	0.000327694	0.000792981	0.000337318	4.14435e-05	5.99131e-06	5.76655e-05	0.000115848	0.00274102			Heilongjiang	17.0958	15.3359	7.08485	2.37034	1.99322	0.376277	0.555652	0.0772946	0.566978	1.21982	0.351696
Shanghai	0	0	0	0	0	0	0	0	0	0	0	0	0	0	0	0			Shanghai	0	0	0	0	0	0	0	0	0	0	0	0	0	0	0	0			Shanghai	0	0	0	0	0	0	0	0	0	0	0
Jiangsu	13.9543	12.5427	6.1912	1.90274	1.58834	0.313856	0.362348	0.0529394	0.452914	0.799612	0.457811	0.082298	0.00676532	0.0376564	0.122185	3.08361			Jiangsu	7.8132	7.13304	3.78679	0.909761	0.815857	0.0928946	0.113574	0.0310053	0.20492	0.495882	0.210938	0.0259163	0.0037466	0.0360605	0.0724443	1.71407			Jiangsu	19.4812	17.4114	8.35517	2.79642	2.28357	0.512721	0.586246	0.0726802	0.676109	1.07297	0.679997
Zhejiang	6.10086	5.46633	2.6348	0.89043	0.724972	0.16545	0.172158	0.0216822	0.214873	0.318405	0.224884	0.0417134	0.00299749	0.0121936	0.0532534	1.29784			Zhejiang	1.4363	1.2936	0.638281	0.2003	0.165754	0.0344948	0.034648	0.00517242	0.0486779	0.0773016	0.0500699	0.00872637	0.000703077	0.00374139	0.012964	0.304731			Zhejiang	10.299	9.22178	4.43166	1.51155	1.22827	0.28331	0.295917	0.036541	0.364448	0.535399	0.382217
Anhui	6.42081	5.77387	2.86521	0.850762	0.71902	0.131408	0.167426	0.025416	0.199351	0.38928	0.195147	0.0354631	0.00308997	0.0189202	0.0556568	1.463			Anhui	5.07994	4.6271	2.42732	0.611359	0.539924	0.0708596	0.0821134	0.0198421	0.139845	0.314086	0.143929	0.0192299	0.00244455	0.0217111	0.0468891	1.10821			Anhui	7.62759	6.80597	3.2593	1.06622	0.880207	0.185901	0.244208	0.0304326	0.252906	0.456953	0.241244
Fujian	2.41715	2.16706	1.03652	0.35764	0.289968	0.067673	0.0677869	0.00852095	0.0873659	0.124961	0.0888762	0.0168437	0.00119203	0.00459474	0.02144	0.513072			Fujian	1.21462	1.08843	0.521696	0.179715	0.145101	0.0346132	0.0336029	0.00420936	0.0446042	0.0610414	0.0458707	0.00861754	0.000599045	0.0022617	0.0108528	0.25446			Fujian	3.49942	3.13784	1.49985	0.517773	0.420349	0.0974268	0.0985526	0.0124014	0.125851	0.182488	0.127581
Jiangxi	3.47717	3.10985	1.49908	0.508043	0.411339	0.0967102	0.0998686	0.0122107	0.124322	0.17684	0.13225	0.0245434	0.00170576	0.0065695	0.0302424	0.733857			Jiangxi	2.81786	2.52496	1.20989	0.417163	0.336738	0.0804248	0.078055	0.0097617	0.103558	0.141513	0.106498	0.0200205	0.00138985	0.00522639	0.0251752	0.590258			Jiangxi	4.07055	3.63625	1.75935	0.589834	0.478479	0.111367	0.119501	0.0144148	0.143011	0.208634	0.155426
Shandong	16.4722	14.7892	7.23014	2.00828	1.75251	0.254132	0.483154	0.0777193	0.47378	1.2328	0.310161	0.0786402	0.00768869	0.0565119	0.141145	4.36023			Shandong	13.2107	12.0607	6.40277	1.53824	1.37947	0.157068	0.192033	0.0524243	0.346483	0.838447	0.356658	0.0438197	0.00633482	0.0609718	0.12249	2.89818			Shandong	19.4076	17.2449	7.97478	2.43132	2.08826	0.341491	0.745163	0.100485	0.588348	1.58771	0.268314
Henan	10.1746	9.18414	4.53931	1.26437	1.10134	0.162008	0.258482	0.0454135	0.297946	0.722137	0.214997	0.0467087	0.00481925	0.0362838	0.0906241	2.55749			Henan	10.4099	9.50373	5.04534	1.21212	1.08701	0.123768	0.15132	0.04131	0.273026	0.66069	0.281044	0.0345296	0.0049918	0.0480454	0.0965214	2.28374			Henan	9.96285	8.89651	4.08389	1.31139	1.11425	0.196425	0.354928	0.0491068	0.320374	0.77744	0.155554
Hubei	3.98228	3.55417	1.74079	0.54228	0.448896	0.0932895	0.120104	0.0154525	0.129334	0.229325	0.134495	0.0254945	0.00191066	0.00942286	0.0331309	0.901414			Hubei	1.78778	1.61808	0.820391	0.234506	0.199249	0.035133	0.0369581	0.0066744	0.0556588	0.102426	0.0572634	0.00908681	0.000868706	0.00595059	0.0162948	0.383947			Hubei	5.95733	5.29666	2.56915	0.819277	0.673578	0.14563	0.194935	0.0233528	0.195641	0.343533	0.204003
Hunan	4.28015	3.82688	1.83759	0.618568	0.502994	0.11555	0.125859	0.0156136	0.151405	0.228686	0.153854	0.0296938	0.0020895	0.008387	0.0371302	0.932034			Hunan	2.41514	2.16442	1.038	0.356961	0.288335	0.0686236	0.0666568	0.00837592	0.0885636	0.121534	0.0910785	0.0170893	0.00119097	0.00453043	0.0215836	0.506085			Hunan	5.95865	5.32309	2.55723	0.854013	0.696187	0.157783	0.179141	0.0221276	0.207963	0.325123	0.210351
Guangdong	4.17694	3.74325	1.78448	0.613711	0.497946	0.11574	0.118577	0.0150523	0.15151	0.221456	0.148399	0.0290448	0.00205279	0.00803915	0.0372062	0.903719			Guangdong	3.80071	3.40554	1.63154	0.562869	0.454286	0.108583	0.105364	0.0131633	0.139745	0.190788	0.143713	0.0270277	0.00187471	0.0070317	0.0339541	0.796073			Guangdong	4.51556	4.0472	1.92212	0.659469	0.53724	0.122181	0.130468	0.0167523	0.162098	0.249057	0.152616
Guangxi	2.13283	1.91113	0.903191	0.308353	0.252101	0.0562113	0.0629469	0.00819994	0.0761483	0.122992	0.067507	0.0143654	0.00104038	0.00435481	0.0189773	0.487068			Guangxi	1.66171	1.48893	0.713312	0.246099	0.198622	0.0474774	0.0460693	0.005755	0.0611005	0.0834112	0.0628351	0.0118177	0.000819645	0.00307368	0.014845	0.348048			Guangxi	2.55684	2.29112	1.07408	0.364381	0.300232	0.0640717	0.0781367	0.0104004	0.0896914	0.158614	0.0717117
Hainan	3.44144	3.08405	1.47014	0.505595	0.410187	0.0953866	0.0977081	0.0124031	0.124889	0.182449	0.122253	0.0239412	0.00169121	0.0066203	0.0306617	0.744693			Hainan	2.99856	2.68677	1.28712	0.444118	0.358429	0.0856891	0.0831448	0.0103845	0.110266	0.150503	0.113397	0.0213286	0.00147907	0.00554384	0.0267875	0.628046			Hainan	3.84004	3.4416	1.63485	0.560925	0.45677	0.104114	0.110815	0.0142199	0.13805	0.2112	0.130223
Chongqing	3.4881	3.12905	1.4707	0.492338	0.40838	0.083834	0.105607	0.0144267	0.119703	0.222103	0.0934157	0.0218919	0.00168785	0.00800519	0.0309075	0.844558			Chongqing	0.283917	0.259201	0.137605	0.033059	0.0296467	0.00337562	0.00412706	0.00112667	0.00744642	0.0180194	0.0076651	0.000941749	0.000136145	0.00131037	0.00263249	0.062286			Chongqing	6.37187	5.71192	2.67048	0.905689	0.74924	0.156247	0.196938	0.0263967	0.220733	0.405778	0.170591
Sichuan	2.09054	1.87807	0.894496	0.290826	0.242204	0.0485321	0.059866	0.00853106	0.0707061	0.131261	0.0574039	0.0126868	0.00101143	0.00518855	0.0186466	0.497844			Sichuan	0.553037	0.504893	0.268038	0.064395	0.0577483	0.0065753	0.00803901	0.00219462	0.0145047	0.0350997	0.0149307	0.00183441	0.000265193	0.00255245	0.00512778	0.121326			Sichuan	3.4743	3.11392	1.45831	0.494614	0.408214	0.0862933	0.10651	0.0142338	0.121287	0.217806	0.0956298
Guizhou	1.85611	1.66485	0.778474	0.256856	0.214468	0.0422948	0.0573366	0.00804816	0.0630472	0.125113	0.0436961	0.0112961	0.000891291	0.00450568	0.0165162	0.467693			Guizhou	0.224259	0.204737	0.108691	0.0261125	0.0234172	0.00266632	0.00325986	0.000889931	0.00588174	0.0142331	0.00605447	0.000743863	0.000107537	0.00103503	0.00207934	0.0491982			Guizhou	3.32477	2.97895	1.38128	0.464526	0.386414	0.0779605	0.106006	0.0144906	0.114496	0.224905	0.0775735
Yunnan	1.38511	1.24323	0.58025	0.192399	0.161337	0.0309976	0.0432722	0.00606051	0.0461301	0.0949752	0.0316443	0.00825257	0.000666038	0.00339864	0.0122063	0.35141			Yunnan	0.213735	0.193845	0.0993862	0.0272896	0.0234648	0.00380706	0.00410761	0.000809848	0.00640569	0.0125581	0.00659109	0.000996912	0.000103533	0.000776598	0.00195608	0.046136			Yunnan	2.43935	2.18768	1.01303	0.340997	0.285422	0.0554691	0.0785204	0.0107861	0.081882	0.169151	0.0541922
Tibet	0	0	0	0	0	0	0	0	0	0	0	0	0	0	0	0			Tibet	0	0	0	0	0	0	0	0	0	0	0	0	0	0	0	0			Tibet	0	0	0	0	0	0	0	0	0	0	0
Shannxi	1.9232	1.72992	0.827916	0.243965	0.211241	0.0325448	0.056889	0.0090911	0.0580389	0.145246	0.0334629	0.00949844	0.000905997	0.0062158	0.0169167	0.5139			Shannxi	1.20886	1.10362	0.58589	0.140758	0.126229	0.0143726	0.0175721	0.00479712	0.0317052	0.0767227	0.0326363	0.00400975	0.000579673	0.00557927	0.0112086	0.2652			Shannxi	2.56612	2.29359	1.04574	0.336851	0.287752	0.0488998	0.0922743	0.0129557	0.0817392	0.206917	0.0342068
Gansu	0.254244	0.228279	0.108492	0.0318377	0.0276932	0.00411984	0.00797241	0.00124697	0.00755153	0.0199924	0.00385434	0.00124727	0.000118852	0.000822022	0.00220299	0.0702292			Gansu	0.0914242	0.0834655	0.0443101	0.0106453	0.00954654	0.00108698	0.00132895	0.0003628	0.00239782	0.00580244	0.00246824	0.000303252	4.38399e-05	0.000421953	0.000847689	0.0200567			Gansu	0.400782	0.358612	0.166255	0.0509109	0.0440253	0.00684941	0.0139515	0.00204272	0.0121899	0.0327634	0.00510184
Qinghai	0	0	0	0	0	0	0	0	0	0	0	0	0	0	0	0			Qinghai	0	0	0	0	0	0	0	0	0	0	0	0	0	0	0	0			Qinghai	0	0	0	0	0	0	0	0	0	0	0
Ningxia	0.825058	0.741015	0.34571	0.108948	0.0927423	0.0161383	0.0256868	0.00388629	0.0268558	0.0616999	0.0142287	0.00452943	0.000390698	0.00233493	0.00739726	0.222286			Ningxia	0	0	0	0	0	0	0	0	0	0	0	0	0	0	0	0			Ningxia	1.56761	1.40793	0.656849	0.207002	0.17621	0.0306628	0.0488049	0.00738394	0.0510261	0.11723	0.0270346
Xinjiang	0.137306	0.118769	0.0637622	0.0137757	0.0121556	0.00161592	0.00613282	0.000649309	0.00262188	0.00936321	0.00486095	0.0007973	5.92721e-05	0.000419343	0.000703295	0.0352886			Xinjiang	0.0343897	0.031396	0.0166675	0.0040043	0.00359098	0.000408874	0.000499893	0.000136469	0.000901953	0.00218262	0.000928441	0.00011407	1.64906e-05	0.00015872	0.000318863	0.00754444			Xinjiang	0.22993	0.197405	0.106147	0.02257	0.0198638	0.00270227	0.0112025	0.00111086	0.00416981	0.0158257	0.00840022
	PM2.5	PM1.0	OC	EC	char-EC	soot-EC	SO42-	NO3-	NH4+	K+	WSOA	WSA	PAHs	Phenols	THM	WSI				PM2.5	PM1.0	OC	EC	char-EC	soot-EC	SO42-	NO3-	NH4+	K+	WSOA	WSA	PAHs	Phenols	THM	WSI				PM2.5	PM1.0	OC	EC	char-EC	soot-EC	SO42-	NO3-	NH4+	K+	WSOA
Nationwide	2.24993	2.0181	0.964013	0.302	0.255	0.047	0.0675591	0.0097239	0.0725684	0.151116	0.0551187	0.0129823	0.00107483	0.00604171	0.0196041	0.560197			Nationwide	1.01346	0.920444	0.475515	0.126962	0.110099	0.0167683	0.0184622	0.00387886	0.0295624	0.0605672	0.0304204	0.00443505	0.000489859	0.00389512	0.00930105	0.219524			Nationwide	3.36276	3.006	1.40366	0.459681	0.384689	0.0748369	0.111746	0.0149845	0.111274	0.23261	0.0773474
[truncated: 5 more columns]

## Sheet: EM-2
2012 total emission from filed burning																			2012 summer harvest emission from filed burning																			2012 autumn harvest emission from filed burning
Gg	PM2.5	PM1.0	OC	EC	char-EC	soot-EC	SO42-	NO3-	NH4+	K+	WSOA	WSA	PAHs	Phenols	THM	WSI			Gg	PM2.5	PM1.0	OC	EC	char-EC	soot-EC	SO42-	NO3-	NH4+	K+	WSOA	WSA	PAHs	Phenols	THM	WSI			Gg	PM2.5	PM1.0	OC	EC	char-EC	soot-EC	SO42-	NO3-	NH4+	K+	WSOA
Beijing	1.7957	1.61303	0.745076	0.229248	0.198132	0.0309276	0.0581665	0.00910812	0.0567212	0.146829	0.0204034	0.00915455	0.000839732	0.00550827	0.0161245	0.515591			Beijing	0.316019	0.288509	0.153163	0.0367969	0.0329988	0.00375729	0.00459369	0.00125406	0.00828836	0.0200568	0.00853177	0.00104823	0.000151538	0.00145853	0.00293014	0.0693285			Beijing	1.47968	1.32452	0.591912	0.192451	0.165133	0.0271703	0.0535728	0.00785406	0.0484329	0.126772	0.0118716
Tianjin	3.14014	2.7985	1.35869	0.380877	0.330086	0.0505296	0.106183	0.0151573	0.0892987	0.237247	0.0617063	0.0164555	0.00144804	0.00978319	0.0253302	0.850844			Tianjin	0.673283	0.614672	0.326317	0.0783964	0.0703044	0.00800496	0.00978693	0.0026718	0.0176585	0.0427314	0.0181771	0.00223327	0.000322854	0.00310743	0.00624271	0.147705			Tianjin	2.46685	2.18383	1.03238	0.302481	0.259781	0.0425247	0.0963959	0.0124855	0.0716403	0.194516	0.0435292
Hebei	42.9023	38.4566	18.6042	5.25435	4.57486	0.67531	1.3259	0.206536	1.24641	3.27757	0.755574	0.210682	0.0199648	0.14215	0.365181	11.5999			Hebei	13.4939	12.3193	6.54004	1.57122	1.40904	0.160435	0.19615	0.0535482	0.353911	0.856423	0.364305	0.0447592	0.00647064	0.062279	0.125116	2.96031			Hebei	29.4083	26.1374	12.0642	3.68313	3.16582	0.514875	1.12975	0.152988	0.892501	2.42115	0.391269
Shanxi	14.5422	13.0468	6.03327	1.85275	1.60151	0.249777	0.481893	0.0738962	0.454314	1.18923	0.171024	0.0747591	0.00678738	0.0440949	0.128655	4.18021			Shanxi	2.27346	2.07555	1.10187	0.264719	0.237395	0.0270301	0.0330473	0.0090218	0.0596269	0.14429	0.061378	0.00754102	0.00109017	0.0104928	0.0210796	0.498753			Shanxi	12.2687	10.9712	4.9314	1.58803	1.36411	0.222747	0.448846	0.0648744	0.394687	1.04494	0.109646
Inner Mongolia	16.1532	14.4768	6.50804	2.13604	1.83333	0.301316	0.576658	0.0837003	0.518788	1.35414	0.16094	0.0876904	0.00757037	0.0438168	0.142203	4.76186			Inner Mongolia	0.0201449	0.0180959	0.00879669	0.0028982	0.00236721	0.000530643	0.000522982	7.1128e-05	0.00071233	0.00104694	0.000732622	0.000133046	9.89958e-06	4.47103e-05	0.000180877	0.00424613			Inner Mongolia	16.1358	14.4612	6.50055	2.13345	1.83124	0.300818	0.576175	0.0836399	0.518147	1.35326	0.16028
Liaoning	15.9456	14.2798	6.49234	2.14458	1.81261	0.330765	0.544589	0.0776046	0.535585	1.23222	0.240953	0.0931891	0.00752744	0.0403778	0.142094	4.45669			Liaoning	0	0	0	0	0	0	0	0	0	0	0	0	0	0	0	0			Liaoning	15.9456	14.2798	6.49234	2.14458	1.81261	0.330765	0.544589	0.0776046	0.535585	1.23222	0.240953
Jilin	31.9481	28.6099	12.9532	4.26374	3.61979	0.641379	1.10933	0.159117	1.06184	2.5401	0.42487	0.183103	0.0150298	0.0826851	0.28407	9.10889			Jilin	0	0	0	0	0	0	0	0	0	0	0	0	0	0	0	0			Jilin	31.9481	28.6099	12.9532	4.26374	3.61979	0.641379	1.10933	0.159117	1.06184	2.5401	0.42487
Heilongjiang	78.5347	70.4507	32.55	10.8877	9.15579	1.72802	2.55162	0.355047	2.60422	5.6032	1.61595	0.464983	0.037631	0.191507	0.689272	20.5316			Heilongjiang	0.0516228	0.0471289	0.0250198	0.00601091	0.00539047	0.000613766	0.000750396	0.000204856	0.00135393	0.00327636	0.00139369	0.000171232	2.47543e-05	0.000238256	0.000478649	0.0113251			Heilongjiang	78.4831	70.4036	32.5249	10.8817	9.1504	1.7274	2.55087	0.354842	2.60287	5.59992	1.61456
Shanghai	2.58078	2.31742	1.13242	0.364975	0.300073	0.0648453	0.0679011	0.00933598	0.0885335	0.138445	0.091439	0.0165303	0.00126188	0.00606889	0.0228389	0.552655			Shanghai	0.426894	0.389732	0.206901	0.0497071	0.0445764	0.00507553	0.00620539	0.00169405	0.0111963	0.0270938	0.0115251	0.001416	0.000204705	0.00197026	0.00395818	0.0936524			Shanghai	2.15389	1.92769	0.925518	0.315268	0.255496	0.0597698	0.0616957	0.00764193	0.0773372	0.111352	0.0799138
Jiangsu	57.7131	51.8751	25.606	7.86949	6.56917	1.29807	1.49863	0.218951	1.8732	3.3071	1.89345	0.340374	0.0279805	0.155742	0.505341	12.7534			Jiangsu	15.3068	13.9743	7.4187	1.78231	1.59835	0.18199	0.222502	0.0607424	0.401459	0.971483	0.413249	0.0507725	0.00733997	0.0706462	0.141926	3.35803			Jiangsu	42.4062	37.9007	18.1873	6.08718	4.97082	1.11608	1.27613	0.158209	1.47174	2.33561	1.4802
Zhejiang	15.5251	13.9104	6.70489	2.26592	1.84487	0.421029	0.438099	0.0551757	0.546797	0.810261	0.572273	0.10615	0.00762786	0.0310297	0.135516	3.30268			Zhejiang	1.73133	1.55931	0.769389	0.241443	0.199801	0.0415802	0.0417649	0.00623487	0.0586766	0.0931798	0.0603545	0.0105188	0.000847494	0.00450989	0.0156269	0.367324			Zhejiang	13.7938	12.3511	5.9355	2.02448	1.64507	0.379448	0.396334	0.0489409	0.48812	0.717081	0.511919
Anhui	70.9579	63.8085	31.6641	9.40198	7.94607	1.45222	1.85027	0.280879	2.20307	4.30203	2.15662	0.391912	0.0341481	0.209092	0.615077	16.168			Anhui	26.5925	24.222	12.7066	3.20034	2.82639	0.370936	0.429847	0.103869	0.732062	1.64418	0.753442	0.100665	0.0127967	0.113654	0.245455	5.80128			Anhui	44.3655	39.5866	18.9576	6.20164	5.11968	1.08128	1.42042	0.177009	1.47101	2.65785	1.40318
Fujian	9.47369	8.49351	4.06248	1.40172	1.13649	0.265235	0.265681	0.0333967	0.342419	0.489766	0.348338	0.0660167	0.00467201	0.0180084	0.0840311	2.01091			Fujian	2.255	2.02071	0.968549	0.333647	0.269385	0.0642607	0.062385	0.00781484	0.0828095	0.113326	0.0851607	0.0159988	0.00111215	0.00419893	0.0201486	0.472415			Fujian	7.21869	6.4728	3.09393	1.06807	0.867105	0.200974	0.203296	0.0255819	0.259609	0.376441	0.263177
Jiangxi	13.2636	11.8625	5.71821	1.93792	1.56905	0.3689	0.380947	0.0465776	0.474226	0.674554	0.504464	0.0936203	0.00650661	0.0250593	0.115359	2.79929			Jiangxi	5.09148	4.56225	2.18611	0.753757	0.608439	0.145317	0.141035	0.017638	0.187115	0.255695	0.192427	0.0361742	0.00251127	0.00944337	0.0454882	1.06651			Jiangxi	8.17213	7.30022	3.5321	1.18416	0.960607	0.223583	0.239913	0.0289395	0.287111	0.418859	0.312037
Shandong	61.2215	54.9662	26.8719	7.46408	6.51348	0.944521	1.79571	0.288855	1.76087	4.58187	1.15276	0.292278	0.0285762	0.210035	0.524587	16.2054			Shandong	23.2577	21.233	11.2722	2.7081	2.42857	0.276521	0.338077	0.0922938	0.609989	1.4761	0.627902	0.0771453	0.0111526	0.107342	0.215646	5.10229			Shandong	37.9638	33.7332	15.5997	4.75598	4.0849	0.668	1.45764	0.196562	1.15089	3.10577	0.524857
Henan	75.1621	67.8451	33.5328	9.34014	8.13585	1.19679	1.90946	0.335479	2.20099	5.33457	1.58822	0.345046	0.0356008	0.268035	0.669458	18.8927			Henan	36.4265	33.2554	17.6546	4.24146	3.80366	0.43309	0.5295	0.144552	0.955372	2.31189	0.983429	0.120826	0.0174673	0.16812	0.337748	7.99127			Henan	38.7356	34.5896	15.8781	5.09868	4.33218	0.763699	1.37996	0.190927	1.24561	3.02269	0.604794
Hubei	16.098	14.3674	7.03697	2.19211	1.81462	0.377113	0.485507	0.0624652	0.522818	0.927021	0.543681	0.103059	0.00772363	0.0380909	0.133928	3.64387			Hubei	3.42329	3.09832	1.5709	0.449037	0.381527	0.0672734	0.0707681	0.0127803	0.106577	0.196127	0.109649	0.0173996	0.00166342	0.0113943	0.0312017	0.735189			Hubei	12.6747	11.2691	5.46607	1.74308	1.43309	0.30984	0.414739	0.049685	0.416242	0.730894	0.434032
Hunan	56.5345	50.5474	24.2719	8.17037	6.64382	1.52624	1.66241	0.206233	1.99984	3.02061	2.03218	0.392212	0.0275992	0.11078	0.490436	12.3108			Hunan	15.1108	13.5421	6.49444	2.23339	1.80402	0.429356	0.41705	0.0524054	0.554114	0.760397	0.569849	0.106923	0.00745151	0.0283454	0.135041	3.16641			Hunan	41.4237	37.0054	17.7775	5.93698	4.8398	1.09689	1.24536	0.153828	1.44573	2.26021	1.46233
Guangdong	23.9552	21.468	10.2342	3.5197	2.85577	0.663779	0.680051	0.0863263	0.868925	1.27007	0.851081	0.166575	0.011773	0.0461054	0.213381	5.18292			Guangdong	10.3251	9.25159	4.43229	1.52911	1.23413	0.294979	0.286235	0.0357598	0.379636	0.5183	0.390414	0.0734242	0.00509289	0.0191025	0.0922406	2.16263			Guangdong	13.6301	12.2164	5.80188	1.99059	1.62165	0.3688	0.393816	0.0505665	0.489289	0.751774	0.460667
Guangxi	28.7894	25.7969	12.1915	4.16221	3.40292	0.758752	0.849671	0.110685	1.02787	1.66017	0.911225	0.193907	0.0140433	0.0587822	0.256159	6.57456			Guangxi	10.6248	9.52007	4.56084	1.57353	1.26997	0.303565	0.294562	0.0367969	0.39067	0.533323	0.401761	0.0755609	0.00524072	0.0196528	0.0949172	2.22539			Guangxi	18.1647	16.2768	7.63063	2.58868	2.13295	0.455187	0.555109	0.0738877	0.637197	1.12685	0.509464
Hainan	3.26735	2.92804	1.39577	0.480019	0.389437	0.0905613	0.0927654	0.0117757	0.118572	0.173219	0.116068	0.0227301	0.00160566	0.0062854	0.0291106	0.707022			Hainan	1.34852	1.2083	0.578848	0.19973	0.161193	0.0385363	0.0373921	0.00467012	0.0495891	0.0676847	0.0509969	0.00959196	0.000665169	0.00249319	0.0120469	0.282446			Hainan	1.91883	1.71974	0.816919	0.280289	0.228244	0.0520251	0.0553733	0.00710554	0.0689825	0.105535	0.0650713
Chongqing	5.47019	4.90711	2.30641	0.772105	0.640438	0.131472	0.165617	0.0226246	0.187723	0.348311	0.146498	0.0343318	0.00264695	0.0125541	0.0484704	1.32447			Chongqing	0.210908	0.192548	0.10222	0.0245579	0.0220231	0.00250758	0.00306579	0.000836951	0.00553158	0.0133858	0.00569403	0.000699579	0.000101135	0.000973412	0.00195555	0.0462692			Chongqing	5.25928	4.71456	2.20419	0.747547	0.618415	0.128964	0.162551	0.0217876	0.182191	0.334925	0.140804
Sichuan	19.9768	17.9465	8.54763	2.77908	2.31445	0.463764	0.572068	0.0815211	0.675654	1.25431	0.548541	0.121233	0.00966508	0.0495808	0.178184	4.7573			Sichuan	2.50329	2.28537	1.21326	0.29148	0.261394	0.0297627	0.0363881	0.00993383	0.0656547	0.158877	0.0675828	0.00830335	0.00120038	0.0115535	0.0232106	0.549173			Sichuan	17.4735	15.6611	7.33438	2.4876	2.05306	0.434001	0.53568	0.0715873	0.609999	1.09543	0.480958
Guizhou	6.01521	5.39538	2.52285	0.832411	0.69504	0.137067	0.185814	0.0260822	0.204321	0.405461	0.141609	0.0366081	0.00288846	0.0146018	0.053525	1.51568			Guizhou	0.34426	0.314291	0.166851	0.0400853	0.0359477	0.00409306	0.00500421	0.00136613	0.00902904	0.0218492	0.0092942	0.0011419	0.00016508	0.00158887	0.00319199	0.075524			Guizhou	5.67095	5.08109	2.356	0.792325	0.659092	0.132974	0.18081	0.024716	0.195292	0.383612	0.132314
Yunnan	11.3684	10.2039	4.76242	1.57912	1.32418	0.254414	0.355158	0.0497418	0.378614	0.779512	0.259721	0.0677332	0.00546653	0.0278945	0.100183	2.88421			Yunnan	0.830955	0.753626	0.386391	0.106096	0.0912258	0.014801	0.0159695	0.00314851	0.0249039	0.0488233	0.0256247	0.00387577	0.000402513	0.00301924	0.0076048	0.179367			Yunnan	10.5374	9.45025	4.37603	1.47302	1.23295	0.239613	0.339189	0.0465933	0.35371	0.730689	0.234097
Tibet	0.591175	0.538533	0.278912	0.0718414	0.0639319	0.00784615	0.0107571	0.0024211	0.01568	0.0390271	0.0149815	0.00214262	0.000284292	0.00250953	0.0053472	0.134765			Tibet	0.358946	0.327698	0.173969	0.0417953	0.0374812	0.00426766	0.00521768	0.00142441	0.00941422	0.0227813	0.00969069	0.00119062	0.000172122	0.00165665	0.00332816	0.0787458			Tibet	0.232229	0.210835	0.104943	0.0300461	0.0264507	0.00357848	0.00553944	0.000996687	0.00626577	0.0162458	0.00529081
Shannxi	16.2513	14.6181	6.996	2.06153	1.78502	0.275008	0.48072	0.076821	0.490436	1.22735	0.282766	0.0802631	0.0076558	0.0525244	0.142948	4.34253			Shannxi	4.83868	4.41746	2.34514	0.563411	0.505257	0.0575292	0.0703357	0.0192014	0.126906	0.307098	0.130633	0.0160498	0.00232025	0.0223321	0.0448645	1.06151			Shannxi	11.4126	10.2006	4.65086	1.49812	1.27976	0.217479	0.410384	0.0576196	0.36353	0.920252	0.152133
Gansu	7.1727	6.44019	3.06076	0.898201	0.781278	0.116228	0.224917	0.0351793	0.213043	0.564024	0.108738	0.0351878	0.00335303	0.0231908	0.0621505	1.9813			Gansu	1.22175	1.11539	0.592139	0.142259	0.127575	0.0145259	0.0177595	0.00484828	0.0320433	0.077541	0.0329843	0.00405252	0.000585855	0.00563878	0.0113281	0.268028			Gansu	5.95095	5.3248	2.46862	0.755942	0.653702	0.101702	0.207157	0.030331	0.180999	0.486483	0.0757539
Qinghai	0.788995	0.715873	0.356572	0.0989123	0.0873644	0.0114724	0.0185271	0.00348882	0.0216947	0.0566634	0.0162928	0.00318436	0.000377466	0.00301283	0.00700936	0.195376			Qinghai	0	0	0	0	0	0	0	0	0	0	0	0	0	0	0	0			Qinghai	0.788995	0.715873	0.356572	0.0989123	0.0873644	0.0114724	0.0185271	0.00348882	0.0216947	0.0566634	0.0162928
Ningxia	3.52236	3.16356	1.47592	0.465126	0.395938	0.0688983	0.109663	0.0165915	0.114654	0.263411	0.0607457	0.0193372	0.00166798	0.00996836	0.0315806	0.948992			Ningxia	0	0	0	0	0	0	0	0	0	0	0	0	0	0	0	0			Ningxia	3.52236	3.16356	1.47592	0.465126	0.395938	0.0688983	0.109663	0.0165915	0.114654	0.263411	0.0607457
Xinjiang	27.696	23.9569	12.8615	2.7787	2.45191	0.325948	1.23705	0.130972	0.528859	1.88865	0.980504	0.160824	0.0119558	0.0845857	0.141862	7.11807			Xinjiang	3.28583	2.99979	1.59253	0.382598	0.343107	0.0390667	0.0477632	0.0130392	0.0861788	0.208542	0.0887096	0.010899	0.00157563	0.0151652	0.0304663	0.720848			Xinjiang	24.4101	20.9572	11.269	2.3961	2.10881	0.286881	1.18929	0.117933	0.44268	1.68011	0.891794
	PM2.5	PM1.0	OC	EC	char-EC	soot-EC	SO42-	NO3-	NH4+	K+	WSOA	WSA	PAHs	Phenols	THM	WSI				PM2.5	PM1.0	OC	EC	char-EC	soot-EC	SO42-	NO3-	NH4+	K+	WSOA	WSA	PAHs	Phenols	THM	WSI				PM2.5	PM1.0	OC	EC	char-EC	soot-EC	SO42-	NO3-	NH4+	K+	WSOA
Nationwide	738.357	661.805	318.837	98.057	82.7873	15.2282	22.0917	3.17174	23.426	49.0969	18.7736	4.23127	0.351879	2.02346	6.35941	182.313			Nationwide	182.344	165.606	85.5481	22.8479	19.8115	3.01941	3.32368	0.697822	5.32048	10.8955	5.47489	0.798514	0.0881387	0.700421	1.67342	39.496			Nationwide	556.016	496.201	233.29	75.2094	62.976	12.2088	18.7681	2.47393	18.1056	38.2016	13.2988
2012 flux concentration of smoke PM2.5																			2012 summer harvest flux concentration of smoke PM2.5																			2012 autumn harvest flux concentration of smoke PM2.5
μg/m³/d	PM2.5	PM1.0	OC	EC	char-EC	soot-EC	SO42-	NO3-	NH4+	K+	WSOA	WSA	PAHs	Phenols	THM	WSI			μg/m³/d	PM2.5	PM1.0	OC	EC	char-EC	soot-EC	SO42-	NO3-	NH4+	K+	WSOA	WSA	PAHs	Phenols	THM	WSI			μg/m³/d	PM2.5	PM1.0	OC	EC	char-EC	soot-EC	SO42-	NO3-	NH4+	K+	WSOA
Beijing	1.92447	1.72869	0.798504	0.245687	0.212339	0.0331454	0.0623375	0.00976125	0.0607886	0.157357	0.0218665	0.009811	0.000899947	0.00590326	0.0172808	0.552563			Beijing	0.714991	0.652749	0.346531	0.0832528	0.0746596	0.00850084	0.0103932	0.00283731	0.0187524	0.0453785	0.0193031	0.00237161	0.000342854	0.00329992	0.00662943	0.156855			Beijing	3.013	2.69705	1.20528	0.391878	0.336251	0.0553255	0.109087	0.0159928	0.0986212	0.258139	0.0241735
Tianjin	4.74669	4.23027	2.05383	0.575742	0.498964	0.0763816	0.160508	0.022912	0.134986	0.358628	0.0932765	0.0248745	0.00218888	0.0147885	0.0382896	1.28615			Tianjin	2.14858	1.96154	1.04134	0.250178	0.224355	0.0255454	0.031232	0.00852624	0.0563517	0.136364	0.0580066	0.0071268	0.00103029	0.00991641	0.0199217	0.471357			Tianjin	7.085	6.27213	2.96506	0.868749	0.746112	0.122134	0.276856	0.0358592	0.205756	0.558665	0.125019
Hebei	4.02401	3.60703	1.74498	0.492831	0.429098	0.0633406	0.124362	0.019372	0.116907	0.30742	0.0708689	0.0197609	0.00187259	0.013333	0.0342521	1.08801			Hebei	2.67195	2.43935	1.295	0.31112	0.279006	0.031768	0.0388399	0.0106032	0.0700784	0.169581	0.0721365	0.00886282	0.00128126	0.012332	0.0247745	0.586175			Hebei	5.24087	4.65795	2.14996	0.656371	0.564181	0.091756	0.201332	0.027264	0.159053	0.431474	0.0697282
Shanxi	1.63144	1.46367	0.676852	0.207854	0.179668	0.0280216	0.0540619	0.00829017	0.050968	0.133416	0.0191866	0.00838697	0.000761453	0.00494686	0.0144333	0.468964			Shanxi	0.538442	0.491569	0.260964	0.0626957	0.0562243	0.00640178	0.00782687	0.00213671	0.0141219	0.0341734	0.0145367	0.001786	0.000258195	0.00248509	0.00499246	0.118124			Shanxi	2.61514	2.33857	1.05115	0.338496	0.290767	0.0474795	0.0956735	0.0138283	0.0841294	0.222734	0.0233715
Inner Mongolia	0.247468	0.221786	0.0997036	0.0327242	0.0280867	0.00461618	0.00883444	0.00128229	0.00794787	0.0207454	0.00246561	0.00134342	0.000115978	0.000671275	0.00217856	0.0729519			Inner Mongolia	0.000651533	0.000585264	0.000284506	9.37345e-05	7.6561e-05	1.71622e-05	1.69145e-05	2.30045e-06	2.30384e-05	3.38603e-05	2.36947e-05	4.30302e-06	3.20176e-07	1.44604e-06	5.84999e-06	0.00013733			Inner Mongolia	0.469682	0.420939	0.189219	0.0621008	0.0533041	0.00875623	0.0167714	0.0024346	0.0150823	0.0393909	0.00466545
Liaoning	1.92583	1.72465	0.784116	0.259013	0.218919	0.0399483	0.0657731	0.00937274	0.0646856	0.148822	0.0291012	0.011255	0.000909131	0.00487665	0.0171614	0.53826			Liaoning	0	0	0	0	0	0	0	0	0	0	0	0	0	0	0	0			Liaoning	3.65908	3.27684	1.48982	0.492124	0.415947	0.0759018	0.124969	0.0178082	0.122903	0.282761	0.0552923
Jilin	2.94158	2.63422	1.19266	0.392579	0.333288	0.0590543	0.102141	0.0146505	0.0977677	0.233877	0.0391195	0.016859	0.00138385	0.00761314	0.0261554	0.838691			Jilin	0	0	0	0	0	0	0	0	0	0	0	0	0	0	0	0			Jilin	5.58901	5.00502	2.26605	0.745901	0.633247	0.112203	0.194067	0.027836	0.185759	0.444366	0.074327
Heilongjiang	3.06127	2.74615	1.26879	0.4244	0.356891	0.0673577	0.0994617	0.0138396	0.101512	0.218411	0.0629894	0.018125	0.00146685	0.00746488	0.0268677	0.800317			Heilongjiang	0.00424808	0.00387827	0.00205889	0.000494641	0.000443585	5.05072e-05	6.17506e-05	1.68577e-05	0.000111416	0.000269613	0.000114688	1.40908e-05	2.03704e-06	1.96063e-05	3.93883e-05	0.000931946			Heilongjiang	5.81258	5.2142	2.40885	0.805914	0.677693	0.127934	0.188922	0.0262802	0.192772	0.414739	0.119577
Shanghai	7.17997	6.44728	3.15049	1.01539	0.834829	0.180405	0.188907	0.0259735	0.246308	0.385167	0.254391	0.0459887	0.00351067	0.0168842	0.0635399	1.53754			Shanghai	2.50728	2.28901	1.21519	0.291945	0.261811	0.0298101	0.0364461	0.00994967	0.0657594	0.15913	0.0676906	0.00831659	0.00120229	0.0115719	0.0232476	0.550049			Shanghai	11.3854	10.1897	4.89226	1.6665	1.35055	0.315941	0.326122	0.040395	0.408802	0.588601	0.422422
Jiangsu	10.0296	9.01506	4.44993	1.36759	1.14162	0.225584	0.260438	0.0380502	0.325532	0.574721	0.329052	0.0591517	0.00486257	0.0270655	0.0878202	2.21634			Jiangsu	5.61574	5.12687	2.72175	0.653891	0.586397	0.066768	0.0816311	0.022285	0.147286	0.356415	0.151612	0.0186273	0.00269287	0.0259185	0.0520694	1.23199			Jiangsu	14.0021	12.5144	6.00528	2.00993	1.64131	0.368519	0.421364	0.0522389	0.485953	0.771196	0.488748
Zhejiang	2.66913	2.39152	1.15272	0.389563	0.317175	0.0723844	0.0753191	0.00948597	0.0940068	0.139302	0.0983868	0.0182496	0.0013114	0.00533471	0.0232984	0.567806			Zhejiang	0.628382	0.56595	0.279248	0.0876311	0.0725174	0.0150915	0.0151585	0.00226293	0.0212966	0.0338194	0.0219056	0.00381779	0.000307596	0.00163686	0.00567177	0.13332			Zhejiang	4.5058	4.03453	1.93885	0.661302	0.537367	0.123948	0.129464	0.0159867	0.159446	0.234237	0.16722
Anhui	8.86683	7.97344	3.95671	1.17486	0.992933	0.181468	0.231208	0.0350983	0.275294	0.537577	0.269489	0.0489729	0.00426711	0.0261279	0.0768594	2.02034			Anhui	7.01515	6.3898	3.35202	0.844257	0.745609	0.0978538	0.113395	0.027401	0.193119	0.433738	0.19876	0.0265556	0.00337581	0.0299821	0.0647516	1.53039			Anhui	10.5333	9.39872	4.50094	1.47241	1.21552	0.25672	0.33724	0.0420259	0.349251	0.631031	0.333146
Fujian	1.36352	1.22245	0.584701	0.201746	0.163572	0.0381745	0.0382388	0.00480669	0.0492833	0.0704907	0.0501353	0.0095016	0.00067243	0.0025919	0.0120944	0.289425			Fujian	0.685172	0.613984	0.29429	0.101377	0.0818517	0.0195254	0.0189555	0.00237451	0.0251614	0.0344336	0.0258758	0.00486118	0.000337923	0.00127583	0.00612207	0.143541			Fujian	1.97403	1.77006	0.846072	0.292077	0.23712	0.0549587	0.0555938	0.00699566	0.0709931	0.102942	0.0719688
Jiangxi	1.39087	1.24394	0.599631	0.203217	0.164535	0.0386841	0.0399474	0.00488428	0.049729	0.070736	0.0528998	0.00981734	0.000682305	0.0026278	0.012097	0.293543			Jiangxi	1.12714	1.00998	0.483956	0.166865	0.134695	0.0321699	0.031222	0.00390468	0.0414231	0.0566054	0.0425992	0.00800819	0.000555941	0.00209056	0.0100701	0.236103			Jiangxi	1.62822	1.4545	0.703738	0.235934	0.191392	0.0445468	0.0478003	0.00576592	0.0572042	0.0834536	0.0621704
Shandong	7.0007	6.28541	3.07281	0.853521	0.744818	0.108006	0.20534	0.0330307	0.201357	0.523938	0.131818	0.0334221	0.0032677	0.0240175	0.0599867	1.8531			Shandong	5.61455	5.12579	2.72118	0.653752	0.586273	0.0667538	0.0816138	0.0222803	0.147255	0.35634	0.15158	0.0186234	0.0026923	0.025913	0.0520583	1.23172			Shandong	8.24823	7.32906	3.38928	1.03331	0.887509	0.145133	0.316694	0.0427061	0.250048	0.674777	0.114033
Henan	7.96276	7.18759	3.5525	0.989506	0.861921	0.126789	0.20229	0.035541	0.233175	0.565151	0.168258	0.0365546	0.00377159	0.028396	0.0709232	2.00152			Henan	8.14691	7.4377	3.94853	0.948618	0.850703	0.0968622	0.118425	0.0323295	0.213672	0.517062	0.219947	0.0270232	0.00390662	0.0376007	0.0755385	1.78728			Henan	7.79701	6.96249	3.19608	1.0263	0.872018	0.153724	0.27777	0.0384314	0.250728	0.608431	0.121738
Hubei	1.51706	1.35397	0.663158	0.206583	0.171008	0.0355389	0.0457538	0.00588668	0.04927	0.0873618	0.0512361	0.00971219	0.000727869	0.00358966	0.0126213	0.343396			Hubei	0.681061	0.61641	0.31253	0.0893356	0.0759045	0.013384	0.0140793	0.00254263	0.0212033	0.0390194	0.0218146	0.00346164	0.000330936	0.00226689	0.00620756	0.146265			Hubei	2.26946	2.01778	0.978724	0.312106	0.256601	0.0554783	0.0742609	0.00889632	0.0745299	0.13087	0.0777154
Hunan	4.66925	4.17477	2.00465	0.674801	0.548721	0.126054	0.137301	0.017033	0.165169	0.249475	0.16784	0.0323932	0.00227945	0.00914945	0.0405057	1.01676			Hunan	2.6347	2.36118	1.13236	0.389412	0.314547	0.0748621	0.0727165	0.00913737	0.0966149	0.132582	0.0993584	0.0186429	0.00129924	0.00494229	0.0235457	0.552092			Hunan	6.50035	5.807	2.7897	0.931651	0.759477	0.172127	0.195427	0.0241392	0.226869	0.354679	0.229474
Guangdong	2.37326	2.12685	1.01391	0.3487	0.282924	0.0657611	0.0673732	0.00855242	0.0860852	0.125827	0.0843173	0.0165027	0.00116636	0.0045677	0.0211399	0.513476			Guangdong	2.15949	1.93497	0.927011	0.319812	0.258117	0.0616948	0.059866	0.00747915	0.0794007	0.108402	0.0816549	0.0153566	0.00106518	0.00399528	0.0192921	0.452314			Guangdong	2.56566	2.29954	1.09211	0.374698	0.30525	0.0694209	0.0741297	0.00951836	0.0921012	0.14151	0.0867136
Guangxi	2.13283	1.91113	0.903191	0.308353	0.252101	0.0562113	0.0629469	0.00819994	0.0761483	0.122992	0.067507	0.0143654	0.00104038	0.00435481	0.0189773	0.487068			Guangxi	1.66171	1.48893	0.713312	0.246099	0.198622	0.0474774	0.0460693	0.005755	0.0611005	0.0834112	0.0628351	0.0118177	0.000819645	0.00307368	0.014845	0.348048			Guangxi	2.55684	2.29112	1.07408	0.364381	0.300232	0.0640717	0.0781367	0.0104004	0.0896914	0.158614	0.0717117
Hainan	1.68698	1.51179	0.720655	0.247841	0.201072	0.0467581	0.0478961	0.00607995	0.0612203	0.0894357	0.0599278	0.0117359	0.000829025	0.00324524	0.0150302	0.365046			Hainan	1.46988	1.31704	0.630943	0.217705	0.1757	0.0420044	0.0407573	0.00509042	0.054052	0.0737762	0.0555865	0.0104552	0.000725033	0.00271757	0.0131311	0.307866			Hainan	1.88237	1.68706	0.801396	0.274963	0.223907	0.0510365	0.0543211	0.00697052	0.0676717	0.103529	0.0638348
Chongqing	1.1627	1.04302	0.490233	0.164113	0.136127	0.0279447	0.0352022	0.0048089	0.0399009	0.0740344	0.0311386	0.00729731	0.000562615	0.0026684	0.0103025	0.281519			Chongqing	0.0946391	0.0864005	0.0458683	0.0110197	0.00988224	0.00112521	0.00137569	0.000375558	0.00248214	0.00600648	0.00255503	0.000313916	4.53815e-05	0.000436791	0.000877498	0.020762			Chongqing	2.12396	1.90397	0.890161	0.301896	0.249747	0.0520822	0.0656461	0.00879891	0.0735778	0.135259	0.0568638
Sichuan	0.723649	0.6501	0.309633	0.100671	0.0838398	0.0167996	0.0207229	0.00295306	0.0244752	0.0454365	0.0198706	0.00439159	0.000350112	0.00179604	0.0064546	0.17233			Sichuan	0.191436	0.174771	0.0927823	0.0222906	0.0199898	0.00227606	0.00278274	0.000759678	0.00502087	0.0121499	0.00516831	0.000634989	9.17976e-05	0.00088354	0.001775	0.0419973			Sichuan	1.20264	1.0779	0.504799	0.171213	0.141305	0.0298707	0.036869	0.0049271	0.0419841	0.0753945	0.0331026
Guizhou	0.598745	0.537048	0.251121	0.0828569	0.0691833	0.0136435	0.0184957	0.00259618	0.0203378	0.040359	0.0140955	0.00364391	0.000287513	0.00145344	0.0053278	0.150869			Guizhou	0.0723417	0.0660441	0.0350615	0.00842339	0.00755394	0.000860102	0.00105157	0.000287075	0.00189733	0.00459132	0.00195305	0.000239956	3.46894e-05	0.000333881	0.000670755	0.0158704			Guizhou	1.07251	0.960951	0.445574	0.149847	0.12465	0.0251485	0.0341954	0.00467438	0.0369343	0.0725499	0.0250237
Yunnan	0.519418	0.466213	0.217594	0.0721496	0.0605013	0.0116241	0.0162271	0.00227269	0.0172988	0.0356157	0.0118666	0.00309471	0.000249764	0.00127449	0.00457735	0.131779			Yunnan	0.0801507	0.0726919	0.0372698	0.0102336	0.00879929	0.00142765	0.00154036	0.000303693	0.00240214	0.0047093	0.00247166	0.000373842	3.88248e-05	0.000291224	0.000733529	0.017301			Yunnan	0.914758	0.820381	0.379885	0.127874	0.107033	0.0208009	0.0294451	0.00404479	0.0307057	0.0634315	0.0203221
Tibet	0.00861061	0.00784387	0.00406242	0.00104639	0.000931185	0.000114281	0.00015668	3.52639e-05	0.000228383	0.000568439	0.000218209	3.12079e-05	4.14079e-06	3.6552e-05	7.78832e-05	0.00196289			Tibet	0.0110372	0.0100764	0.00534933	0.00128516	0.0011525	0.000131226	0.000160438	4.3799e-05	0.000289477	0.000700499	0.000297978	3.66101e-05	5.29256e-06	5.09402e-05	0.000102337	0.00242134			Tibet	0.0064267	0.00583464	0.00290419	0.000831496	0.000731996	9.90309e-05	0.000153298	2.75823e-05	0.000173399	0.000449585	0.000146418
Shannxi	1.38471	1.24554	0.5961	0.175655	0.152094	0.0234323	0.0409601	0.00654559	0.041788	0.104577	0.0240933	0.00683887	0.000652318	0.00447538	0.01218	0.370008			Shannxi	0.870376	0.794607	0.421841	0.101346	0.0908849	0.0103483	0.0126519	0.00345393	0.0228277	0.0552403	0.0234981	0.00288702	0.000417364	0.00401708	0.00807016	0.190944			Shannxi	1.8476	1.65138	0.752932	0.242533	0.207181	0.0352079	0.0664375	0.00932809	0.0588522	0.14898	0.0246289
Gansu	0.310743	0.279008	0.132601	0.0389128	0.0338473	0.00503536	0.00974406	0.00152407	0.00922964	0.0244352	0.00471086	0.00152444	0.000145263	0.00100469	0.00269254	0.0858356			Gansu	0.111741	0.102013	0.0541568	0.013011	0.011668	0.00132853	0.00162428	0.000443422	0.00293067	0.00709187	0.00301674	0.000370642	5.35821e-05	0.00051572	0.00103606	0.0245138			Gansu	0.489845	0.438304	0.203201	0.0622244	0.0538086	0.0083715	0.0170519	0.00249665	0.0148987	0.0400442	0.00623558
Qinghai	0.0193436	0.0175509	0.00874199	0.00242501	0.00214189	0.000281267	0.000454225	8.55345e-05	0.000531884	0.0013892	0.000399447	7.80702e-05	9.25424e-06	7.38648e-05	0.000171847	0.00478998			Qinghai	0	0	0	0	0	0	0	0	0	0	0	0	0	0	0	0			Qinghai	0.0367528	0.0333466	0.0166098	0.00460751	0.00406959	0.000534407	0.000863028	0.000162516	0.00101058	0.00263948	0.00075895
Ningxia	1.19175	1.07035	0.499359	0.15737	0.133961	0.0233109	0.0371031	0.00561353	0.0387918	0.089122	0.0205526	0.00654251	0.000564342	0.00337268	0.0106849	0.32108			Ningxia	0	0	0	0	0	0	0	0	0	0	0	0	0	0	0	0			Ningxia	2.26433	2.03367	0.948783	0.299003	0.254526	0.0442908	0.0704959	0.0106657	0.0737043	0.169332	0.0390499
Xinjiang	0.297496	0.257333	0.138151	0.0298474	0.0263372	0.00350117	0.0132878	0.00140684	0.00568073	0.020287	0.0105321	0.00172748	0.000128423	0.000908576	0.00152381	0.0764587			Xinjiang	0.074511	0.0680246	0.0361129	0.00867598	0.00778046	0.000885894	0.0010831	0.000295683	0.00195423	0.00472901	0.00201162	0.000247152	3.57296e-05	0.000343893	0.000690869	0.0163463			Xinjiang	0.498183	0.427711	0.229986	0.0489017	0.0430383	0.00585491	0.024272	0.00240687	0.00903458	0.0342891	0.0182005
	PM2.5	PM1.0	OC	EC	char-EC	soot-EC	SO42-	NO3-	NH4+	K+	WSOA	WSA	PAHs	Phenols	THM	WSI				PM2.5	PM1.0	OC	EC	char-EC	soot-EC	SO42-	NO3-	NH4+	K+	WSOA	WSA	PAHs	Phenols	THM	WSI				PM2.5	PM1.0	OC	EC	char-EC	soot-EC	SO42-	NO3-	NH4+	K+	WSOA
Nationwide	1.37076	1.22864	0.591921	0.182043	0.153695	0.0282712	0.0410133	0.00588835	0.0434904	0.0911485	0.0348532	0.00785536	0.000653263	0.00375655	0.0118063	0.338463			Nationwide	0.714656	0.649058	0.335287	0.0895473	0.0776469	0.0118339	0.0130264	0.00273496	0.0208524	0.0427025	0.0214576	0.0031296	0.00034544	0.00274515	0.00655861	0.154796			Nationwide	1.96126	1.75027	0.822896	0.26529	0.222139	0.0430648	0.0662017	0.00872643	0.0638647	0.13475	0.0469096
[truncated: 5 more columns]

## Sheet: NDRC version
2012 total emission from filed burning																			2012 summer harvest emission from filed burning																			2012 autumn harvest emission from filed burning
Gg	PM2.5	PM1.0	OC	EC	char-EC	soot-EC	SO42-	NO3-	NH4+	K+	WSOA	WSA	PAHs	Phenols	THM	WSI			Gg	PM2.5	PM1.0	OC	EC	char-EC	soot-EC	SO42-	NO3-	NH4+	K+	WSOA	WSA	PAHs	Phenols	THM	WSI			Gg	PM2.5	PM1.0	OC	EC	char-EC	soot-EC	SO42-	NO3-	NH4+	K+	WSOA
Beijing	1.22864	1.10365	0.509789	0.156854	0.135564	0.021161	0.0397981	0.00623187	0.0388093	0.100462	0.0139602	0.00626364	0.000574553	0.00376882	0.0110326	0.352773			Beijing	0.216224	0.197401	0.104796	0.0251768	0.0225781	0.00257078	0.00314305	0.000858043	0.00567098	0.0137231	0.00583753	0.000717209	0.000103684	0.000997943	0.00200483	0.0474353			Beijing	1.01241	0.90625	0.404993	0.131677	0.112986	0.0185902	0.0366551	0.00537383	0.0331383	0.0867386	0.00812268
Tianjin	4.71021	4.19775	2.03804	0.571316	0.495128	0.0757945	0.159274	0.0227359	0.133948	0.355871	0.0925594	0.0246833	0.00217205	0.0146748	0.0379953	1.27627			Tianjin	1.00992	0.922008	0.489475	0.117595	0.105457	0.0120074	0.0146804	0.0040077	0.0264877	0.0640971	0.0272656	0.0033499	0.000484281	0.00466114	0.00936406	0.221558			Tianjin	3.70028	3.27575	1.54856	0.453721	0.389672	0.063787	0.144594	0.0187282	0.10746	0.291774	0.0652939
Hebei	50.9465	45.6672	22.0925	6.23954	5.43265	0.801931	1.5745	0.245262	1.48011	3.89212	0.897244	0.250185	0.0237082	0.168804	0.433653	13.7749			Hebei	16.0241	14.6291	7.7663	1.86582	1.67324	0.190517	0.232928	0.0635885	0.42027	1.017	0.432612	0.0531515	0.00768388	0.0739563	0.148576	3.51537			Hebei	34.9224	31.0381	14.3262	4.37372	3.75941	0.611414	1.34157	0.181673	1.05984	2.87512	0.464632
Shanxi	22.852	20.5021	9.48085	2.91147	2.51665	0.392506	0.75726	0.116123	0.713922	1.86879	0.268752	0.117479	0.0106659	0.069292	0.202171	6.5689			Shanxi	3.57258	3.26157	1.7315	0.415987	0.373049	0.0424759	0.0519314	0.0141771	0.0936994	0.226741	0.0964511	0.0118502	0.00171313	0.0164886	0.0331251	0.783755			Shanxi	19.2794	17.2405	7.74935	2.49548	2.1436	0.35003	0.705329	0.101945	0.620223	1.64205	0.172301
Inner Mongolia	48.4543	43.4256	19.5215	6.40748	5.49942	0.903884	1.7299	0.25108	1.55622	4.06207	0.482674	0.263053	0.0227085	0.131425	0.42656	14.2844			Inner Mongolia	0.0550374	0.0493603	0.0237742	0.00806615	0.00653804	0.00152776	0.00149049	0.000191966	0.00199544	0.00279826	0.00205215	0.000381235	2.71106e-05	0.000109221	0.000492588	0.0115544			Inner Mongolia	48.4019	43.3787	19.499	6.39973	5.49317	0.902389	1.72845	0.250898	1.5543	4.05944	0.480695
Liaoning	60.2388	53.9459	24.5266	8.10175	6.84765	1.24956	2.05734	0.293173	2.02332	4.65504	0.910266	0.352048	0.028437	0.152538	0.536798	16.8364			Liaoning	0	0	0	0	0	0	0	0	0	0	0	0	0	0	0	0			Liaoning	60.2388	53.9459	24.5266	8.10175	6.84765	1.24956	2.05734	0.293173	2.02332	4.65504	0.910266
Jilin	72.6092	65.0224	29.4392	9.69032	8.22678	1.45768	2.52121	0.361629	2.41327	5.77295	0.965614	0.416144	0.0341586	0.187921	0.645614	20.702			Jilin	0	0	0	0	0	0	0	0	0	0	0	0	0	0	0	0			Jilin	72.6092	65.0224	29.4392	9.69032	8.22678	1.45768	2.52121	0.361629	2.41327	5.77295	0.965614
Heilongjiang	115.492	103.604	47.8676	16.0113	13.4644	2.5412	3.75239	0.522128	3.82974	8.24	2.3764	0.683799	0.0553397	0.281627	1.01364	30.1935			Heilongjiang	0.0759159	0.0693072	0.0367938	0.00883957	0.00792716	0.000902598	0.00110352	0.000301258	0.00199108	0.00481817	0.00204955	0.000251812	3.64033e-05	0.000350377	0.000703895	0.0166545			Heilongjiang	115.416	103.535	47.8308	16.0025	13.4565	2.5403	3.75128	0.521827	3.82775	8.23518	2.37435
Shanghai	1.06791	0.958934	0.468587	0.151024	0.124168	0.0268325	0.028097	0.00386316	0.0366346	0.0572877	0.0378368	0.00684011	0.000522159	0.00251127	0.00945058	0.228685			Shanghai	0.176646	0.161268	0.0856141	0.0205685	0.0184454	0.00210022	0.00256775	0.000700986	0.00463296	0.0112112	0.00476902	0.000585931	8.47055e-05	0.000815279	0.00163787	0.0387527			Shanghai	0.891265	0.797665	0.382973	0.130456	0.105723	0.0247323	0.0255293	0.00316218	0.0320016	0.0460765	0.0330678
Jiangsu	47.676	42.8533	21.1528	6.50089	5.4267	1.07232	1.238	0.180873	1.54742	2.73195	1.56416	0.281179	0.0231144	0.128657	0.417455	10.5354			Jiangsu	12.6448	11.544	6.12849	1.47235	1.32037	0.150339	0.183806	0.0501785	0.33164	0.802529	0.341379	0.0419425	0.00606345	0.0583599	0.117243	2.77402			Jiangsu	35.0312	31.3093	15.0243	5.02854	4.10633	0.921979	1.05419	0.130694	1.21578	1.92942	1.22278
Zhejiang	12.1983	10.9296	5.26813	1.78037	1.44954	0.330808	0.34422	0.0433524	0.429626	0.636634	0.449643	0.0834037	0.00599332	0.0243805	0.106477	2.59496			Zhejiang	1.36033	1.22518	0.60452	0.189705	0.156987	0.0326702	0.0328153	0.00489882	0.0461031	0.0732127	0.0474214	0.00826479	0.000665888	0.00354349	0.0122783	0.288612			Zhejiang	10.838	9.70444	4.66361	1.59066	1.29255	0.298138	0.311405	0.0384535	0.383523	0.563421	0.402222
Anhui	105.213	94.6126	46.9502	13.9409	11.7821	2.15329	2.74351	0.416475	3.26663	6.37887	3.19775	0.58111	0.0506334	0.310033	0.912011	23.9733			Anhui	39.4302	35.9153	18.8408	4.74534	4.19086	0.550009	0.63736	0.154013	1.08547	2.43792	1.11717	0.149262	0.0189745	0.168521	0.363951	8.6019			Anhui	65.7833	58.6973	28.1095	9.19553	7.59125	1.60328	2.10615	0.262462	2.18116	3.94094	2.08058
Fujian	7.32058	6.56316	3.13919	1.08315	0.878197	0.204954	0.205299	0.0258065	0.264596	0.378456	0.26917	0.0510129	0.00361019	0.0139156	0.0649331	1.55389			Fujian	1.7425	1.56145	0.748424	0.257818	0.208161	0.049656	0.0482066	0.00603874	0.0639892	0.0875699	0.065806	0.0123627	0.000859389	0.00324463	0.0155694	0.365048			Fujian	5.57808	5.00171	2.39077	0.82533	0.670035	0.155298	0.157093	0.0197678	0.200607	0.290886	0.203364
Jiangxi	41.4488	37.0702	17.8694	6.056	4.90327	1.15281	1.19046	0.145555	1.48196	2.10798	1.57645	0.292563	0.0203332	0.0783102	0.360498	8.74778			Jiangxi	15.9109	14.257	6.83158	2.35549	1.90137	0.454114	0.440733	0.0551189	0.584733	0.799048	0.601334	0.113045	0.00784772	0.0295105	0.142151	3.33286			Jiangxi	25.5379	22.8132	11.0378	3.70052	3.0019	0.698698	0.749727	0.090436	0.897223	1.30893	0.975116
Shandong	75.6265	67.8994	33.1947	9.22034	8.04606	1.16676	2.21823	0.356821	2.1752	5.65996	1.424	0.361049	0.0353	0.259455	0.648019	20.0185			Shandong	28.7301	26.229	13.9245	3.3453	3	0.341584	0.417624	0.11401	0.753515	1.82342	0.775644	0.0952971	0.0137767	0.132599	0.266386	6.30283			Shandong	46.8965	41.6704	19.2702	5.87504	5.04606	0.825176	1.80061	0.242811	1.42168	3.83654	0.648353
Henan	91.8647	82.9218	40.9845	11.4157	9.94382	1.46274	2.33378	0.41003	2.69009	6.52003	1.94116	0.421723	0.043512	0.327599	0.818227	23.0911			Henan	44.5213	40.6455	21.5779	5.18401	4.64892	0.529333	0.647167	0.176674	1.16768	2.82564	1.20197	0.147676	0.0213489	0.20548	0.412803	9.76711			Henan	47.3435	42.2762	19.4066	6.23172	5.29489	0.933409	1.68662	0.233355	1.52242	3.69439	0.739193
Hubei	60.3673	53.8777	26.3886	8.22042	6.80481	1.41417	1.82065	0.234245	1.96057	3.47633	2.0388	0.386471	0.0289636	0.142841	0.50223	13.6645			Hubei	12.8373	11.6187	5.89088	1.68389	1.43072	0.252275	0.26538	0.047926	0.399662	0.735477	0.411184	0.0652485	0.00623781	0.0427287	0.117006	2.75696			Hubei	47.53	42.259	20.4977	6.53653	5.37409	1.1619	1.55527	0.186319	1.56091	2.74085	1.62762
Hunan	82.4461	73.715	35.3965	11.9151	9.6889	2.22577	2.42435	0.300757	2.91644	4.40505	2.9636	0.571975	0.0402488	0.161554	0.715219	17.9533			Hunan	22.0365	19.7488	9.47105	3.25703	2.63086	0.626144	0.608198	0.0764246	0.808083	1.10891	0.831029	0.155929	0.0108668	0.0413371	0.196936	4.61768			Hunan	60.4096	53.9662	25.9255	8.6581	7.05804	1.59963	1.81616	0.224332	2.10836	3.29614	2.13257
Guangdong	17.2478	15.4569	7.3686	2.53418	2.05616	0.477921	0.489637	0.0621549	0.625626	0.914453	0.612779	0.119934	0.00847654	0.0331959	0.153635	3.7317			Guangdong	7.43408	6.66115	3.19125	1.10096	0.888571	0.212385	0.206089	0.0257471	0.273338	0.373176	0.281098	0.0528654	0.00366688	0.0137538	0.0664132	1.5571			Guangdong	9.81368	8.79579	4.17735	1.43323	1.16759	0.265536	0.283547	0.0364079	0.352288	0.541277	0.331681
Guangxi	40.3052	36.1157	17.0681	5.8271	4.76409	1.06225	1.18954	0.154958	1.43901	2.32424	1.27571	0.27147	0.0196606	0.082295	0.358623	9.20438			Guangxi	14.8747	13.3281	6.38518	2.20295	1.77795	0.424992	0.412387	0.0515157	0.546938	0.746652	0.562465	0.105785	0.00733701	0.0275139	0.132884	3.11554			Guangxi	25.4305	22.7876	10.6829	3.62415	2.98613	0.637262	0.777152	0.103443	0.892076	1.57759	0.713249
Hainan	7.31887	6.5588	3.12652	1.07524	0.872339	0.202857	0.207794	0.0263775	0.265601	0.388011	0.259993	0.0509155	0.00359667	0.0140793	0.0652077	1.58373			Hainan	3.02068	2.70659	1.29662	0.447394	0.361073	0.0863212	0.0837582	0.0104611	0.11108	0.151614	0.114233	0.021486	0.00148998	0.00558474	0.0269851	0.632679			Hainan	4.29819	3.85221	1.8299	0.627848	0.511266	0.116536	0.124036	0.0159164	0.154521	0.236398	0.14576
Chongqing	30.7698	27.6025	12.9736	4.34309	3.60247	0.73953	0.931594	0.127263	1.05594	1.95925	0.824053	0.193117	0.0148891	0.0706166	0.272646	7.45015			Chongqing	1.18636	1.08308	0.574987	0.138138	0.12388	0.0141051	0.0172451	0.00470785	0.0311151	0.0752949	0.0320289	0.00393513	0.000568885	0.00547544	0.011	0.260264			Chongqing	29.5835	26.5194	12.3986	4.20495	3.47859	0.725424	0.914348	0.122555	1.02483	1.88396	0.792024
Sichuan	66.5894	59.8215	28.4921	9.2636	7.71485	1.54588	1.90689	0.271737	2.25218	4.18102	1.82847	0.40411	0.0322169	0.165269	0.593946	15.8577			Sichuan	8.34428	7.61789	4.04418	0.9716	0.871313	0.0992089	0.121294	0.0331128	0.218849	0.529588	0.225276	0.0276778	0.00400127	0.0385116	0.0773685	1.83058			Sichuan	58.2451	52.2036	24.4479	8.292	6.84354	1.44667	1.7856	0.238624	2.03333	3.65143	1.60319
Guizhou	25.8654	23.2001	10.8483	3.57937	2.98867	0.58939	0.799002	0.112153	0.878581	1.74348	0.608917	0.157415	0.0124204	0.0627878	0.230157	6.51743			Guizhou	1.48032	1.35145	0.717458	0.172367	0.154575	0.0176001	0.0215181	0.00587437	0.0388249	0.0939516	0.0399651	0.00491018	0.000709844	0.00683216	0.0137256	0.324753			Guizhou	24.3851	21.8487	10.1308	3.407	2.8341	0.57179	0.777484	0.106279	0.839756	1.64953	0.568952
Yunnan	35.3682	31.7454	14.8164	4.91282	4.11966	0.791509	1.10494	0.154752	1.17791	2.42515	0.808022	0.210726	0.017007	0.0867828	0.311681	8.9731			Yunnan	2.58519	2.34461	1.20211	0.330077	0.283814	0.0460475	0.0496829	0.00979536	0.0774788	0.151895	0.0797212	0.012058	0.00125226	0.0093932	0.0236594	0.55803			Yunnan	32.783	29.4008	13.6143	4.58274	3.83585	0.745462	1.05525	0.144957	1.10043	2.27325	0.728301
Tibet	0.315293	0.287218	0.148753	0.0383154	0.034097	0.00418461	0.00573713	0.00129125	0.00836266	0.0208144	0.00799013	0.00114273	0.000151623	0.00133842	0.00285184	0.0718747			Tibet	0.191438	0.174772	0.0927832	0.0222908	0.01999	0.00227609	0.00278276	0.000759685	0.00502092	0.01215	0.00516837	0.000634995	9.17986e-05	0.000883549	0.00177502	0.0419978			Tibet	0.123855	0.112445	0.0559697	0.0160246	0.014107	0.00190852	0.00295437	0.000531566	0.00334174	0.00866441	0.00282177
Shannxi	25.2799	22.7392	10.8827	3.20683	2.77669	0.427791	0.747787	0.119499	0.762901	1.90921	0.439858	0.124854	0.011909	0.0817046	0.222364	6.75504			Shannxi	7.52684	6.87161	3.648	0.876417	0.785955	0.0894899	0.109411	0.0298689	0.19741	0.477707	0.203207	0.0249664	0.00360928	0.0347389	0.0697892	1.65124			Shannxi	17.753	15.8676	7.23467	2.33041	1.99074	0.338301	0.638376	0.0896305	0.565492	1.4315	0.236651
Gansu	21.5181	19.3206	9.18227	2.6946	2.34383	0.348685	0.67475	0.105538	0.639128	1.69207	0.326215	0.105563	0.0100591	0.0695723	0.186451	5.94389			Gansu	3.66525	3.34618	1.77642	0.426777	0.382726	0.0435777	0.0532785	0.0145449	0.0961299	0.232623	0.098953	0.0121576	0.00175757	0.0169163	0.0339843	0.804085			Gansu	17.8529	15.9744	7.40585	2.26783	1.96111	0.305107	0.621472	0.090993	0.542998	1.45945	0.227262
Qinghai	1.10459	1.00222	0.499201	0.138477	0.12231	0.0160614	0.025938	0.00488435	0.0303726	0.0793288	0.02281	0.00445811	0.000528453	0.00421796	0.0098131	0.273526			Qinghai	0	0	0	0	0	0	0	0	0	0	0	0	0	0	0	0			Qinghai	1.10459	1.00222	0.499201	0.138477	0.12231	0.0160614	0.025938	0.00488435	0.0303726	0.0793288	0.02281
Ningxia	4.33522	3.89361	1.81651	0.572463	0.487309	0.0847979	0.13497	0.0204203	0.141112	0.324198	0.0747639	0.0237996	0.0020529	0.0122688	0.0388684	1.16799			Ningxia	0	0	0	0	0	0	0	0	0	0	0	0	0	0	0	0			Ningxia	4.33522	3.89361	1.81651	0.572463	0.487309	0.0847979	0.13497	0.0204203	0.141112	0.324198	0.0747639
Xinjiang	63.9138	55.2852	29.6803	6.41239	5.65826	0.752188	2.85473	0.302243	1.22044	4.35843	2.2627	0.371131	0.0275902	0.195198	0.327373	16.4263			Xinjiang	7.58268	6.92258	3.67506	0.882919	0.791786	0.0901538	0.110223	0.0300905	0.198874	0.481251	0.204714	0.0251516	0.00363606	0.0349966	0.0703069	1.66349			Xinjiang	56.3311	48.3627	26.0053	5.52947	4.86648	0.662034	2.74451	0.272153	1.02157	3.87718	2.05799
	PM2.5	PM1.0	OC	EC	char-EC	soot-EC	SO42-	NO3-	NH4+	K+	WSOA	WSA	PAHs	Phenols	THM	WSI				PM2.5	PM1.0	OC	EC	char-EC	soot-EC	SO42-	NO3-	NH4+	K+	WSOA	WSA	PAHs	Phenols	THM	WSI				PM2.5	PM1.0	OC	EC	char-EC	soot-EC	SO42-	NO3-	NH4+	K+	WSOA
Nationwide	1241.69	1111.9	533.192	164.972	139.207	25.6972	38.2116	5.39941	39.4557	83.6195	30.8223	7.18962	0.590554	3.33863	10.6356	310.307			Nationwide	258.236	234.443	120.86	32.5249	28.1371	4.36438	4.7768	0.985587	7.59068	15.36	7.81081	1.15094	0.124895	0.977303	2.36812	55.8819			Nationwide	983.46	877.459	412.333	132.448	111.07	21.3329	33.4348	4.41384	31.8651	68.2597	23.0116
2012 flux concentration of smoke PM2.5																			2012 summer harvest flux concentration of smoke PM2.5																			2012 autumn harvest flux concentration of smoke PM2.5
μg/m³/d	PM2.5	PM1.0	OC	EC	char-EC	soot-EC	SO42-	NO3-	NH4+	K+	WSOA	WSA	PAHs	Phenols	THM	WSI			μg/m³/d	PM2.5	PM1.0	OC	EC	char-EC	soot-EC	SO42-	NO3-	NH4+	K+	WSOA	WSA	PAHs	Phenols	THM	WSI			μg/m³/d	PM2.5	PM1.0	OC	EC	char-EC	soot-EC	SO42-	NO3-	NH4+	K+	WSOA
Beijing	1.31674	1.18279	0.546345	0.168102	0.145285	0.0226784	0.042652	0.00667875	0.0415922	0.107666	0.0149613	0.00671279	0.000615753	0.00403907	0.0118237	0.37807			Beijing	0.489205	0.446618	0.2371	0.0569625	0.0510829	0.00581637	0.00711114	0.00194132	0.0128306	0.0310484	0.0132074	0.00162268	0.000234584	0.00225784	0.00453592	0.107322			Beijing	2.06152	1.84535	0.824665	0.268127	0.230066	0.0378543	0.0746388	0.0109424	0.0674777	0.176621	0.0165398
Tianjin	7.12004	6.34541	3.08074	0.863612	0.748446	0.114572	0.240762	0.034368	0.202479	0.537942	0.139915	0.0373117	0.00328332	0.0221827	0.0574344	1.92923			Tianjin	3.22287	2.94231	1.56201	0.375268	0.336533	0.0383181	0.046848	0.0127894	0.0845275	0.204546	0.0870099	0.0106902	0.00154544	0.0148746	0.0298826	0.707036			Tianjin	10.6275	9.40819	4.4476	1.30312	1.11917	0.183201	0.415285	0.0537888	0.308635	0.837998	0.187529
Hebei	4.77852	4.28335	2.07216	0.585237	0.509554	0.075217	0.14768	0.0230043	0.138827	0.365061	0.0841569	0.0234661	0.0022237	0.0158329	0.0406744	1.29201			Hebei	3.17295	2.89673	1.53782	0.369454	0.33132	0.0377245	0.0461224	0.0125912	0.0832181	0.201378	0.085662	0.0105246	0.0015215	0.0146442	0.0294197	0.696083			Hebei	6.22353	5.53131	2.55308	0.779441	0.669965	0.10896	0.239082	0.032376	0.188875	0.512375	0.0828022
Shanxi	2.56369	2.30006	1.06363	0.326628	0.282335	0.0440339	0.0849545	0.0130274	0.0800926	0.209653	0.0301503	0.0131795	0.00119657	0.00777363	0.0226809	0.736943			Shanxi	0.846124	0.772466	0.410087	0.0985217	0.0883525	0.0100599	0.0122994	0.00335769	0.0221916	0.0537011	0.0228433	0.00280658	0.000405735	0.00390514	0.00784529	0.185623			Shanxi	4.1095	3.6749	1.65181	0.531923	0.456919	0.0746106	0.150344	0.0217301	0.132203	0.350011	0.0367266
Inner Mongolia	0.742322	0.665283	0.299071	0.098163	0.0842515	0.0138476	0.0265021	0.00384655	0.0238414	0.0622311	0.0073946	0.00402999	0.000347896	0.00201344	0.00653492	0.218838			Inner Mongolia	0.00178004	0.00159643	0.000768914	0.000260878	0.000211456	4.94113e-05	4.8206e-05	6.20863e-06	6.45371e-05	9.05023e-05	6.63715e-05	1.233e-05	8.76822e-07	3.53246e-06	1.59315e-05	0.000373695			Inner Mongolia	1.40889	1.26267	0.56758	0.186284	0.159896	0.0262668	0.0503118	0.00730318	0.0452427	0.118163	0.0139921
Liaoning	7.27537	6.51535	2.96221	0.978493	0.827029	0.150916	0.248476	0.0354081	0.244368	0.562215	0.109938	0.0425188	0.00343449	0.0184229	0.0648321	2.03343			Liaoning	0	0	0	0	0	0	0	0	0	0	0	0	0	0	0	0			Liaoning	13.8232	12.3792	5.62821	1.85914	1.57135	0.28674	0.472105	0.0672755	0.464299	1.06821	0.208882
Jilin	6.68542	5.98687	2.71058	0.892226	0.757472	0.134214	0.232138	0.0332966	0.222199	0.531538	0.0889078	0.038316	0.00314512	0.0173026	0.0594442	1.90612			Jilin	0	0	0	0	0	0	0	0	0	0	0	0	0	0	0	0			Jilin	12.7023	11.3751	5.15011	1.69523	1.4392	0.255007	0.441062	0.0632636	0.422179	1.00992	0.168925
Heilongjiang	4.50186	4.03846	1.86587	0.624117	0.524839	0.0990555	0.146267	0.0203524	0.149282	0.321193	0.0926314	0.0266543	0.00215713	0.0109778	0.0395113	1.17694			Heilongjiang	0.00624717	0.00570333	0.00302779	0.000727414	0.000652331	7.42753e-05	9.08097e-05	2.47907e-05	0.000163847	0.00039649	0.000168659	2.07217e-05	2.99565e-06	2.88328e-05	5.7924e-05	0.00137051			Heilongjiang	8.54791	7.66794	3.54242	1.18517	0.996608	0.188139	0.277826	0.0386473	0.283489	0.60991	0.175848
Shanghai	2.97102	2.66784	1.30365	0.420163	0.345447	0.0746505	0.0781684	0.0107477	0.101921	0.15938	0.105265	0.0190298	0.00145269	0.00698657	0.0262924	0.636222			Shanghai	1.03749	0.947177	0.502837	0.120805	0.108335	0.0123352	0.0150812	0.0041171	0.0272108	0.0658469	0.0280099	0.00344135	0.000497501	0.00478838	0.00961969	0.227606			Shanghai	4.7112	4.21644	2.02438	0.689585	0.558847	0.130734	0.134947	0.0167152	0.16916	0.243559	0.174795
Jiangsu	8.28534	7.44723	3.67603	1.12975	0.943075	0.186352	0.215144	0.0314328	0.268918	0.474769	0.271825	0.0488644	0.00401691	0.0223585	0.0725471	1.83089			Jiangsu	4.63909	4.23524	2.24841	0.540171	0.484415	0.0551562	0.0674344	0.0184094	0.121671	0.29443	0.125244	0.0153878	0.00222454	0.0214109	0.0430138	1.01773			Jiangsu	11.567	10.338	4.96088	1.66037	1.35587	0.304428	0.348083	0.0431539	0.40144	0.637075	0.403748
Zhejiang	2.09717	1.87905	0.905711	0.306085	0.249209	0.0568734	0.0591793	0.00745326	0.0738625	0.109452	0.0773039	0.014339	0.00103039	0.00419156	0.0183059	0.446133			Zhejiang	0.493729	0.444675	0.219409	0.068853	0.056978	0.0118576	0.0119103	0.00177802	0.016733	0.0265724	0.0172115	0.00299969	0.000241683	0.0012861	0.00445639	0.104751			Zhejiang	3.54027	3.16999	1.52338	0.519594	0.422217	0.0973877	0.101721	0.012561	0.125279	0.184043	0.131387
Anhui	13.1474	11.8227	5.86685	1.74204	1.47228	0.269073	0.342826	0.0520423	0.408194	0.797096	0.399588	0.0726149	0.00632709	0.0387413	0.113964	2.99568			Anhui	10.4018	9.47454	4.97024	1.25183	1.10556	0.145094	0.168137	0.040629	0.28635	0.643129	0.294713	0.0393756	0.00500551	0.0444562	0.096011	2.2692			Anhui	15.6184	13.936	6.67381	2.18322	1.80233	0.380654	0.500045	0.0623143	0.517854	0.935667	0.493975
Fujian	1.05363	0.944618	0.451815	0.155895	0.126396	0.0294985	0.0295482	0.00371426	0.0380826	0.0544701	0.0387409	0.00734215	0.000519605	0.00200284	0.00934564	0.223647			Fujian	0.529451	0.474442	0.227406	0.0783372	0.063249	0.0150878	0.0146474	0.00183485	0.0194429	0.0266078	0.0199949	0.00375637	0.000261122	0.000985869	0.00473069	0.110918			Fujian	1.52539	1.36778	0.653783	0.225696	0.183229	0.0424681	0.0429588	0.00540573	0.0548583	0.0795461	0.0556123
Jiangxi	4.34646	3.88731	1.87385	0.635053	0.514173	0.120888	0.124836	0.0152634	0.155403	0.22105	0.165312	0.0306792	0.0021322	0.00821188	0.0378031	0.917322			Jiangxi	3.52232	3.1562	1.51236	0.521454	0.420922	0.100531	0.0975687	0.0122021	0.129447	0.176892	0.133122	0.0250256	0.00173731	0.00653299	0.0314691	0.737822			Jiangxi	5.08818	4.54531	2.19918	0.737292	0.598099	0.139209	0.149376	0.0180185	0.178763	0.260793	0.194283
Shandong	8.64792	7.76432	3.79582	1.05435	0.92007	0.13342	0.253656	0.0408026	0.248735	0.647218	0.162835	0.0412861	0.00403656	0.0296687	0.0741012	2.28912			Shandong	6.93562	6.33185	3.36145	0.807576	0.72422	0.0824606	0.100817	0.0275227	0.181903	0.440184	0.187245	0.0230053	0.00332578	0.0320102	0.0643073	1.52154			Shandong	10.189	9.05355	4.18676	1.27644	1.09634	0.179283	0.391211	0.0527546	0.308883	0.833548	0.140865
Henan	9.73226	8.78483	4.34195	1.2094	1.05346	0.154965	0.247244	0.043439	0.284992	0.69074	0.205649	0.0446778	0.00460972	0.0347062	0.0866839	2.4463			Henan	9.95734	9.09052	4.82598	1.15942	1.03975	0.118387	0.144741	0.0395139	0.261155	0.631965	0.268825	0.0330283	0.00477476	0.0459564	0.0923248	2.18445			Henan	9.52968	8.50971	3.90633	1.25437	1.0658	0.187884	0.339496	0.0469717	0.306445	0.743638	0.148791
Hubei	5.68897	5.07739	2.48684	0.774686	0.64128	0.133271	0.171577	0.022075	0.184762	0.327607	0.192135	0.0364207	0.00272951	0.0134612	0.0473298	1.28773			Hubei	2.55398	2.31154	1.17199	0.335008	0.284642	0.05019	0.0527973	0.00953485	0.0795125	0.146323	0.0818049	0.0129812	0.00124101	0.00850085	0.0232784	0.548495			Hubei	8.51046	7.56666	3.67021	1.1704	0.962255	0.208043	0.278479	0.0333612	0.279487	0.490762	0.291433
Hunan	6.80933	6.08821	2.92344	0.984085	0.800218	0.183829	0.20023	0.0248399	0.240872	0.363818	0.244767	0.0472401	0.0033242	0.0133429	0.0590708	1.48278			Hunan	3.84228	3.44339	1.65137	0.567893	0.458714	0.109174	0.106045	0.0133253	0.140897	0.193349	0.144898	0.0271876	0.00189472	0.0072075	0.0343375	0.805135			Hunan	9.47967	8.46855	4.06831	1.35866	1.10757	0.251019	0.284997	0.0352029	0.33085	0.517241	0.33465
Guangdong	1.70875	1.53133	0.730013	0.251064	0.203705	0.047348	0.0485087	0.00615774	0.0619813	0.0905957	0.0607085	0.011882	0.000839778	0.00328874	0.0152207	0.369703			Guangdong	1.55483	1.39318	0.667448	0.230265	0.185844	0.0444202	0.0431035	0.00538499	0.0571685	0.0780496	0.0587915	0.0110568	0.000766927	0.0028766	0.0138903	0.325666			Guangdong	1.84727	1.65567	0.786322	0.269783	0.21978	0.049983	0.0533734	0.00685322	0.0663128	0.101887	0.0624338
Guangxi	2.98596	2.67559	1.26447	0.431694	0.352942	0.0786958	0.0881256	0.0114799	0.106608	0.172189	0.0945098	0.0201116	0.00145653	0.00609673	0.0265682	0.681896			Guangxi	2.32639	2.0845	0.998637	0.344539	0.278071	0.0664683	0.064497	0.008057	0.0855406	0.116776	0.0879691	0.0165447	0.0011475	0.00430315	0.0207829	0.487268			Guangxi	3.57958	3.20756	1.50372	0.510133	0.420325	0.0897004	0.109391	0.0145605	0.125568	0.22206	0.100396
Hainan	3.77884	3.3864	1.61427	0.555163	0.450402	0.104738	0.107287	0.0136191	0.137133	0.200336	0.134238	0.0262884	0.00185702	0.00726935	0.0336677	0.817703			Hainan	3.29253	2.95018	1.41331	0.487659	0.393569	0.0940899	0.0912963	0.0114025	0.121077	0.165259	0.124514	0.0234197	0.00162407	0.00608735	0.0294137	0.689619			Hainan	4.21651	3.77901	1.79513	0.615918	0.501551	0.114322	0.121679	0.015614	0.151585	0.231906	0.14299
Chongqing	6.5402	5.86697	2.75756	0.923134	0.765713	0.157189	0.198012	0.0270501	0.224443	0.416443	0.175154	0.0410474	0.00316471	0.0150097	0.0579516	1.58355			Chongqing	0.532345	0.486003	0.258009	0.0619857	0.0555876	0.00632928	0.00773824	0.00211251	0.013962	0.0337865	0.0143721	0.00176578	0.000255271	0.00245695	0.00493592	0.116786			Chongqing	11.9473	10.7098	5.00716	1.69817	1.40483	0.292962	0.369259	0.0494939	0.413875	0.760834	0.319859
Sichuan	2.41216	2.167	1.03211	0.335569	0.279466	0.0559986	0.0690762	0.00984353	0.0815839	0.151455	0.0662353	0.0146386	0.00116704	0.00598678	0.0215153	0.574435			Sichuan	0.638119	0.582569	0.309274	0.0743019	0.0666326	0.00758688	0.00927579	0.00253226	0.0167362	0.0404996	0.0172277	0.00211663	0.000305992	0.00294513	0.00591667	0.139991			Sichuan	4.0088	3.59299	1.68266	0.570709	0.471016	0.0995691	0.122897	0.0164237	0.139947	0.251315	0.110342
Guizhou	2.5746	2.30931	1.07982	0.356285	0.297488	0.058667	0.0795315	0.0111636	0.0874526	0.173544	0.0606107	0.0156688	0.00123631	0.00624981	0.0229095	0.648735			Guizhou	0.311069	0.28399	0.150764	0.0362206	0.0324819	0.00369844	0.00452174	0.00123442	0.00815854	0.0197427	0.00839813	0.00103181	0.000149164	0.00143569	0.00288425	0.0682426			Guizhou	4.61178	4.13209	1.91597	0.644342	0.535993	0.108139	0.14704	0.0200998	0.158817	0.311965	0.107602
Yunnan	1.61597	1.45044	0.676958	0.224466	0.188226	0.0361639	0.0504843	0.0070706	0.0538184	0.110804	0.0369183	0.009628	0.000777044	0.00396508	0.0142406	0.409979			Yunnan	0.249358	0.226152	0.115951	0.0318379	0.0273756	0.00444157	0.00479222	0.000944823	0.00747331	0.0146512	0.0076896	0.00116306	0.000120788	0.000906031	0.00228209	0.0538254			Yunnan	2.84591	2.5523	1.18187	0.39783	0.332992	0.0647139	0.0916071	0.0125838	0.095529	0.197342	0.0632242
Tibet	0.00459232	0.0041834	0.00216662	0.000558074	0.000496632	6.09499e-05	8.35627e-05	1.88074e-05	0.000121804	0.000303167	0.000116378	1.66442e-05	2.20842e-06	1.94944e-05	4.15377e-05	0.00104687			Tibet	0.00588649	0.00537406	0.00285298	0.000685417	0.000614669	6.99871e-05	8.55668e-05	2.33595e-05	0.000154387	0.000373599	0.000158921	1.95254e-05	2.8227e-06	2.71681e-05	5.45798e-05	0.00129138			Tibet	0.00342757	0.00311181	0.0015489	0.000443464	0.000390398	5.28165e-05	8.17591e-05	1.47106e-05	9.24793e-05	0.000239779	7.80895e-05
Shannxi	2.15399	1.93751	0.927266	0.27324	0.23659	0.0364502	0.0637157	0.010182	0.0650035	0.162676	0.0374784	0.0106382	0.00101472	0.0069617	0.0189467	0.575568			Shannxi	1.35392	1.23606	0.656197	0.157649	0.141377	0.0160973	0.0196807	0.00537278	0.0355098	0.0859294	0.0365526	0.00449092	0.000649233	0.00624878	0.0125536	0.297024			Shannxi	2.87405	2.56882	1.17123	0.377273	0.322282	0.0547678	0.103347	0.0145104	0.0915479	0.231747	0.0383117
Gansu	0.932229	0.837025	0.397803	0.116738	0.101542	0.0151061	0.0292322	0.00457221	0.0276889	0.0733056	0.0141326	0.00457332	0.00043579	0.00301408	0.00807763	0.257507			Gansu	0.335222	0.30604	0.16247	0.0390329	0.035004	0.0039856	0.00487283	0.00133027	0.00879201	0.0212756	0.00905021	0.00111193	0.000160746	0.00154716	0.00310819	0.0735413			Gansu	1.46953	1.31491	0.609603	0.186673	0.161426	0.0251145	0.0511556	0.00748996	0.0446962	0.120133	0.0187067
Qinghai	0.027081	0.0245712	0.0122388	0.00339501	0.00299865	0.000393773	0.000635915	0.000119748	0.000744637	0.00194488	0.000559226	0.000109298	1.29559e-05	0.000103411	0.000240585	0.00670597			Qinghai	0	0	0	0	0	0	0	0	0	0	0	0	0	0	0	0			Qinghai	0.0514539	0.0466853	0.0232537	0.00645052	0.00569743	0.00074817	0.00120824	0.000227522	0.00141481	0.00369528	0.00106253
Ningxia	1.46677	1.31736	0.614596	0.193686	0.164875	0.0286904	0.0456654	0.00690895	0.0477437	0.109689	0.0252955	0.00805232	0.000694574	0.00415099	0.0131507	0.395176			Ningxia	0	0	0	0	0	0	0	0	0	0	0	0	0	0	0	0			Ningxia	2.78686	2.50298	1.16773	0.368004	0.313263	0.0545117	0.0867642	0.013127	0.090713	0.208408	0.0480614
Xinjiang	0.686529	0.593846	0.318811	0.0688786	0.0607782	0.00807962	0.0306641	0.00324654	0.0131094	0.0468161	0.0243048	0.0039865	0.00029636	0.00209671	0.00351648	0.176443			Xinjiang	0.171948	0.15698	0.0833374	0.0200215	0.0179549	0.00204437	0.00249947	0.000682346	0.00450976	0.0109131	0.0046422	0.00057035	8.2453e-05	0.000793599	0.00159431	0.0377222			Xinjiang	1.14965	0.987025	0.530737	0.11285	0.0993191	0.0135113	0.0560123	0.00555432	0.020849	0.0791287	0.0420011
	PM2.5	PM1.0	OC	EC	char-EC	soot-EC	SO42-	NO3-	NH4+	K+	WSOA	WSA	PAHs	Phenols	THM	WSI				PM2.5	PM1.0	OC	EC	char-EC	soot-EC	SO42-	NO3-	NH4+	K+	WSOA	WSA	PAHs	Phenols	THM	WSI				PM2.5	PM1.0	OC	EC	char-EC	soot-EC	SO42-	NO3-	NH4+	K+	WSOA
Nationwide	2.3052	2.06424	0.989871	0.306271	0.258437	0.0477069	0.0709398	0.010024	0.0732495	0.15524	0.0572217	0.0133475	0.00109636	0.00619817	0.019745	0.576086			Nationwide	1.0121	0.918848	0.473686	0.127474	0.110277	0.0171052	0.0187216	0.00386279	0.02975	0.0602002	0.0306127	0.00451087	0.000489499	0.00383032	0.00928131	0.219017			Nationwide	3.46901	3.0951	1.45444	0.46719	0.391782	0.0752485	0.117936	0.0155691	0.112399	0.240776	0.0811699
[truncated: 5 more columns]

## Sheet: Average
2012 total emission from filed burning																			2012 summer harvest emission from filed burning																			2012 autumn harvest emission from filed burning
Gg	PM2.5	PM1.0	OC	EC	char-EC	soot-EC	SO42-	NO3-	NH4+	K+	WSOA	WSA	PAHs	Phenols	THM	WSI			Gg	PM2.5	PM1.0	OC	EC	char-EC	soot-EC	SO42-	NO3-	NH4+	K+	WSOA	WSA	PAHs	Phenols	THM	WSI			Gg	PM2.5	PM1.0	OC	EC	char-EC	soot-EC	SO42-	NO3-	NH4+	K+	WSOA
Beijing	0.945106	0.848962	0.392145	0.120657	0.10428	0.0162777	0.030614	0.00479375	0.0298533	0.0772783	0.0107386	0.00481818	0.000441964	0.00289909	0.0084866	0.271364			Beijing	0.166326	0.151847	0.0806123	0.0193668	0.0173678	0.00197752	0.00241773	0.000660033	0.00436229	0.0105562	0.0044904	0.000551699	7.97568e-05	0.000767649	0.00154218	0.0364887			Beijing	0.77878	0.697115	0.311533	0.10129	0.086912	0.0143002	0.0281962	0.00413372	0.025491	0.066722	0.00624821
Tianjin	2.04109	1.81903	0.88315	0.24757	0.214556	0.0328443	0.0690188	0.00985221	0.0580442	0.154211	0.0401091	0.0106961	0.000941223	0.00635907	0.0164646	0.553048			Tianjin	0.437634	0.399537	0.212106	0.0509577	0.0456979	0.00520322	0.00636151	0.00173667	0.011478	0.0277754	0.0118151	0.00145162	0.000209855	0.00201983	0.00405776	0.0960085			Tianjin	1.60345	1.41949	0.671044	0.196613	0.168858	0.027641	0.0626573	0.00811554	0.0465662	0.126435	0.028294
Hebei	50.9465	45.6672	22.0925	6.23954	5.43265	0.801931	1.5745	0.245262	1.48011	3.89212	0.897244	0.250185	0.0237082	0.168804	0.433653	13.7749			Hebei	16.0241	14.6291	7.7663	1.86582	1.67324	0.190517	0.232928	0.0635885	0.42027	1.017	0.432612	0.0531515	0.00768388	0.0739563	0.148576	3.51537			Hebei	34.9224	31.0381	14.3262	4.37372	3.75941	0.611414	1.34157	0.181673	1.05984	2.87512	0.464632
Shanxi	18.6971	16.7744	7.75706	2.38211	2.05908	0.321141	0.619576	0.0950094	0.584118	1.52901	0.219888	0.0961188	0.00872663	0.0566934	0.165413	5.37455			Shanxi	2.92302	2.66856	1.41668	0.340353	0.305222	0.034753	0.0424894	0.0115995	0.0766632	0.185516	0.0789146	0.00969559	0.00140165	0.0134907	0.0271023	0.641254			Shanxi	15.7741	14.1059	6.34038	2.04176	1.75386	0.286388	0.577087	0.0834099	0.507455	1.3435	0.140973
Inner Mongolia	17.9477	16.0851	7.23101	2.37334	2.037	0.334792	0.640727	0.0929992	0.576424	1.50458	0.178814	0.0974328	0.00841138	0.0486839	0.158001	5.29089			Inner Mongolia	0.0220834	0.0198328	0.00962877	0.00318531	0.00259892	0.000586038	0.000576733	7.78412e-05	0.000783614	0.00114423	0.00080593	0.000146834	1.08557e-05	4.82942e-05	0.000198195	0.00465215			Inner Mongolia	17.9283	16.0677	7.22269	2.37047	2.03468	0.334238	0.64019	0.092932	0.575711	1.5036	0.178081
Liaoning	31.8911	28.5596	12.9847	4.28916	3.62523	0.66153	1.08918	0.155209	1.07117	2.46443	0.481905	0.186378	0.0150549	0.0807556	0.284187	8.91339			Liaoning	0	0	0	0	0	0	0	0	0	0	0	0	0	0	0	0			Liaoning	31.8911	28.5596	12.9847	4.28916	3.62523	0.66153	1.08918	0.155209	1.07117	2.46443	0.481905
Jilin	60.9918	54.6188	24.7289	8.13987	6.9105	1.22445	2.11782	0.303769	2.02715	4.84928	0.811115	0.349561	0.0286932	0.157853	0.542316	17.3897			Jilin	0	0	0	0	0	0	0	0	0	0	0	0	0	0	0	0			Jilin	60.9918	54.6188	24.7289	8.13987	6.9105	1.22445	2.11782	0.303769	2.02715	4.84928	0.811115
Heilongjiang	124.732	111.892	51.697	17.2922	14.5416	2.7445	4.05258	0.563898	4.13612	8.8992	2.56651	0.738503	0.0597669	0.304157	1.09473	32.609			Heilongjiang	0.0819892	0.0748518	0.0397373	0.00954674	0.00856134	0.000974806	0.00119181	0.000325359	0.00215036	0.00520363	0.00221352	0.000271957	3.93156e-05	0.000378407	0.000760207	0.0179869			Heilongjiang	124.65	111.817	51.6573	17.2827	14.533	2.74352	4.05139	0.563573	4.13397	8.894	2.5643
Shanghai	1.33489	1.19867	0.585734	0.18878	0.15521	0.0335407	0.0351213	0.00482895	0.0457932	0.0716097	0.047296	0.00855013	0.000652699	0.00313908	0.0118132	0.285856			Shanghai	0.220807	0.201585	0.107018	0.0257106	0.0230568	0.00262527	0.00320968	0.000876233	0.0057912	0.014014	0.00596128	0.000732414	0.000105882	0.0010191	0.00204733	0.0484409			Shanghai	1.11408	0.997082	0.478716	0.16307	0.132153	0.0309154	0.0319116	0.00395272	0.040002	0.0575956	0.0413347
Jiangsu	67.7501	60.8968	30.0593	9.2381	7.71163	1.52382	1.75926	0.25703	2.19897	3.88224	2.22275	0.39957	0.0328467	0.182828	0.593226	14.9714			Jiangsu	17.9689	16.4047	8.7089	2.09228	1.87632	0.21364	0.261198	0.0713063	0.471278	1.14044	0.485118	0.0596025	0.00861648	0.0829325	0.166608	3.94203			Jiangsu	49.7812	44.4921	21.3504	7.14582	5.83531	1.31018	1.49806	0.185723	1.72769	2.74181	1.73763
Zhejiang	19.4064	17.388	8.38111	2.8324	2.30609	0.526286	0.547623	0.0689697	0.683496	1.01283	0.715341	0.132688	0.00953483	0.0387871	0.169396	4.12835			Zhejiang	2.16416	1.94914	0.961736	0.301803	0.249751	0.0519753	0.0522062	0.00779358	0.0733458	0.116475	0.0754432	0.0131485	0.00105937	0.00563737	0.0195337	0.459156			Zhejiang	17.2423	15.4389	7.41937	2.5306	2.05634	0.47431	0.495417	0.0611761	0.61015	0.896351	0.639898
Anhui	70.9579	63.8085	31.6641	9.40198	7.94607	1.45222	1.85027	0.280879	2.20307	4.30203	2.15662	0.391912	0.0341481	0.209092	0.615077	16.168			Anhui	26.5925	24.222	12.7066	3.20034	2.82639	0.370936	0.429847	0.103869	0.732062	1.64418	0.753442	0.100665	0.0127967	0.113654	0.245455	5.80128			Anhui	44.3655	39.5866	18.9576	6.20164	5.11968	1.08128	1.42042	0.177009	1.47101	2.65785	1.40318
Fujian	12.0574	10.8099	5.17043	1.78401	1.44644	0.337572	0.33814	0.0425049	0.435805	0.623339	0.443339	0.0840213	0.0059462	0.0229198	0.106949	2.55934			Fujian	2.87	2.57181	1.2327	0.424642	0.342854	0.0817863	0.0793991	0.00994616	0.105394	0.144233	0.108386	0.0203621	0.00141546	0.0053441	0.0256436	0.601255			Fujian	9.18742	8.23811	3.93773	1.35937	1.10359	0.255785	0.258741	0.0325587	0.330412	0.479106	0.334953
Jiangxi	28.1852	25.2077	12.1512	4.11808	3.33422	0.783912	0.809513	0.0989773	1.00773	1.43343	1.07199	0.198943	0.0138265	0.053251	0.245139	5.94849			Jiangxi	10.8194	9.69479	4.64547	1.60173	1.29293	0.308798	0.299698	0.0374808	0.397618	0.543352	0.408907	0.0768703	0.00533645	0.0200672	0.0966624	2.26634			Jiangxi	17.3658	15.513	7.50572	2.51635	2.04129	0.475114	0.509815	0.0614965	0.610112	0.890075	0.663079
Shandong	90.0316	80.8327	39.5175	10.9766	9.57864	1.389	2.64076	0.424787	2.58952	6.73804	1.69523	0.42982	0.0420238	0.308875	0.771452	23.8315			Shandong	34.2025	31.225	16.5767	3.9825	3.57143	0.406648	0.497172	0.135726	0.897042	2.17073	0.923386	0.113449	0.0164008	0.157856	0.317127	7.50337			Shandong	55.8291	49.6076	22.9407	6.99409	6.00721	0.982353	2.14358	0.289061	1.69248	4.56731	0.771848
Henan	83.5134	75.3834	37.2587	10.3779	9.03983	1.32977	2.12162	0.372754	2.44554	5.9273	1.76469	0.383385	0.0395564	0.297817	0.743843	20.9919			Henan	40.4739	36.9505	19.6163	4.71274	4.22629	0.481212	0.588334	0.160613	1.06152	2.56876	1.0927	0.134251	0.0194081	0.1868	0.375275	8.87919			Henan	43.0395	38.4329	17.6424	5.6652	4.81354	0.848554	1.53329	0.212141	1.38402	3.35854	0.671993
Hubei	36.2204	32.3266	15.8332	4.93225	4.08289	0.848505	1.09239	0.140547	1.17634	2.0858	1.22328	0.231882	0.0173782	0.0857046	0.301338	8.19871			Hubei	7.70239	6.97123	3.53453	1.01033	0.858435	0.151365	0.159228	0.0287556	0.239797	0.441286	0.246711	0.0391491	0.00374268	0.0256372	0.0702038	1.65417			Hubei	28.518	25.3554	12.2986	3.92192	3.22445	0.69714	0.933163	0.111791	0.936543	1.64451	0.976572
Hunan	63.6013	56.8659	27.3059	9.19167	7.47429	1.71702	1.87022	0.232012	2.24982	3.39818	2.28621	0.441238	0.0310491	0.124627	0.55174	13.8497			Hunan	16.9996	15.2348	7.30624	2.51257	2.02952	0.483025	0.469181	0.0589561	0.623378	0.855447	0.64108	0.120288	0.00838294	0.0318886	0.151922	3.56221			Hunan	46.6017	41.631	19.9997	6.6791	5.44477	1.234	1.40103	0.173056	1.62645	2.54273	1.64513
Guangdong	28.7463	25.7616	12.281	4.22364	3.42693	0.796535	0.816061	0.103592	1.04271	1.52409	1.0213	0.19989	0.0141276	0.0553265	0.256058	6.21951			Guangdong	12.3901	11.1019	5.31875	1.83493	1.48095	0.353975	0.343482	0.0429118	0.455563	0.62196	0.468497	0.088109	0.00611147	0.022923	0.110689	2.59516			Guangdong	16.3561	14.6596	6.96225	2.38871	1.94598	0.44256	0.472579	0.0606798	0.587147	0.902129	0.552801
Guangxi	32.2442	28.8926	13.6545	4.66168	3.81127	0.849803	0.951632	0.123967	1.15121	1.85939	1.02057	0.217176	0.0157285	0.065836	0.286898	7.36351			Guangxi	11.8997	10.6625	5.10814	1.76236	1.42236	0.339993	0.32991	0.0412125	0.43755	0.597321	0.449972	0.0846282	0.00586961	0.0220111	0.106307	2.49243			Guangxi	20.3444	18.2301	8.54631	2.89932	2.3889	0.509809	0.621722	0.0827542	0.713661	1.26207	0.570599
Hainan	5.09707	4.56773	2.1774	0.748829	0.607522	0.141276	0.144714	0.01837	0.184972	0.270222	0.181066	0.035459	0.00250483	0.00980522	0.0454125	1.10295			Hainan	2.10369	1.88495	0.903002	0.311578	0.251461	0.0601166	0.0583316	0.00728539	0.077359	0.105588	0.0795552	0.0149635	0.00103766	0.00388937	0.0187932	0.440616			Hainan	2.99338	2.68279	1.27439	0.437251	0.35606	0.0811591	0.0863824	0.0110846	0.107613	0.164634	0.101511
Chongqing	15.043	13.4945	6.34263	2.12329	1.76121	0.361548	0.455446	0.0622175	0.516238	0.957856	0.402871	0.0944125	0.00727911	0.0345237	0.133294	3.64229			Chongqing	0.579998	0.529507	0.281105	0.0675343	0.0605635	0.00689585	0.00843092	0.00230161	0.0152118	0.0368108	0.0156586	0.00192384	0.000278122	0.00267688	0.00537776	0.12724			Chongqing	14.463	12.965	6.06152	2.05575	1.70064	0.354652	0.447015	0.0599159	0.501026	0.921045	0.387212
Sichuan	42.1733	37.887	18.045	5.86695	4.88607	0.979057	1.2077	0.1721	1.42638	2.64798	1.15803	0.255936	0.0204041	0.10467	0.376166	10.0432			Sichuan	5.28471	4.82466	2.56132	0.615347	0.551831	0.0628323	0.0768193	0.0209714	0.138604	0.335406	0.142675	0.0175293	0.00253413	0.0243907	0.0490001	1.15936			Sichuan	36.8886	33.0623	15.4837	5.2516	4.33424	0.916224	1.13088	0.151129	1.28778	2.31257	1.01536
Guizhou	13.835	12.4094	5.80256	1.91454	1.59859	0.315255	0.427373	0.059989	0.469939	0.932561	0.3257	0.0841986	0.00664346	0.0335842	0.123107	3.48607			Guizhou	0.791798	0.722869	0.383757	0.0921961	0.0826797	0.00941403	0.0115097	0.0031421	0.0207668	0.0502532	0.0213767	0.00262638	0.000379684	0.00365441	0.00734158	0.173705			Guizhou	13.0432	11.6865	5.4188	1.82235	1.51591	0.305841	0.415864	0.0568469	0.449172	0.882308	0.304323
Yunnan	22.7367	20.4078	9.52484	3.15824	2.64836	0.508827	0.710316	0.0994836	0.757228	1.55902	0.519443	0.135466	0.0109331	0.0557889	0.200366	5.76842			Yunnan	1.66191	1.50725	0.772783	0.212192	0.182452	0.029602	0.031939	0.00629702	0.0498078	0.0976465	0.0512493	0.00775154	0.000805025	0.00603848	0.0152096	0.358733			Yunnan	21.0748	18.9005	8.75206	2.94605	2.4659	0.479225	0.678377	0.0931866	0.70742	1.46138	0.468194
Tibet	0.23647	0.215413	0.111565	0.0287366	0.0255728	0.00313846	0.00430285	0.000968439	0.00627199	0.0156108	0.0059926	0.00085705	0.000113717	0.00100381	0.00213888	0.053906			Tibet	0.143578	0.131079	0.0695874	0.0167181	0.0149925	0.00170707	0.00208707	0.000569764	0.00376569	0.00911251	0.00387628	0.000476247	6.88489e-05	0.000662662	0.00133126	0.0314983			Tibet	0.0928916	0.084334	0.0419773	0.0120184	0.0105803	0.00143139	0.00221577	0.000398675	0.00250631	0.00649831	0.00211633
Shannxi	19.8627	17.8665	8.55067	2.51965	2.18169	0.336121	0.587547	0.0938924	0.599422	1.50009	0.345603	0.0980993	0.00935709	0.0641964	0.174714	5.30753			Shannxi	5.91395	5.39912	2.86628	0.688614	0.617536	0.0703135	0.0859659	0.0234684	0.155107	0.375342	0.159663	0.0196164	0.00283587	0.0272948	0.0548343	1.29741			Shannxi	13.9488	12.4674	5.68439	1.83104	1.56415	0.265808	0.501581	0.070424	0.444315	1.12475	0.18594
Gansu	10.433	9.36755	4.45201	1.30647	1.1364	0.169059	0.327152	0.0511698	0.30988	0.820399	0.158165	0.0511823	0.00487714	0.033732	0.0904007	2.88188			Gansu	1.77709	1.62239	0.861293	0.206922	0.185564	0.0211286	0.025832	0.00705205	0.0466085	0.112787	0.0479772	0.00589457	0.000852153	0.00820186	0.0164772	0.389859			Gansu	8.65593	7.74516	3.59072	1.09955	0.95084	0.147931	0.30132	0.0441178	0.263272	0.707612	0.110187
Qinghai	0.512846	0.465317	0.231772	0.064293	0.0567868	0.00745709	0.0120426	0.00226773	0.0141016	0.0368312	0.0105903	0.00206984	0.000245353	0.00195834	0.00455608	0.126994			Qinghai	0	0	0	0	0	0	0	0	0	0	0	0	0	0	0	0			Qinghai	0.512846	0.465317	0.231772	0.064293	0.0567868	0.00745709	0.0120426	0.00226773	0.0141016	0.0368312	0.0105903
Ningxia	3.52236	3.16356	1.47592	0.465126	0.395938	0.0688983	0.109663	0.0165915	0.114654	0.263411	0.0607457	0.0193372	0.00166798	0.00996836	0.0315806	0.948992			Ningxia	0	0	0	0	0	0	0	0	0	0	0	0	0	0	0	0			Ningxia	3.52236	3.16356	1.47592	0.465126	0.395938	0.0688983	0.109663	0.0165915	0.114654	0.263411	0.0607457
Xinjiang	31.9569	27.6426	14.8402	3.20619	2.82913	0.376094	1.42737	0.151122	0.610222	2.17922	1.13135	0.185566	0.0137951	0.0975989	0.163687	8.21316			Xinjiang	3.79134	3.46129	1.83753	0.44146	0.395893	0.0450769	0.0551114	0.0150452	0.099437	0.240626	0.102357	0.0125758	0.00181803	0.0174983	0.0351535	0.831747			Xinjiang	28.1656	24.1813	13.0026	2.76474	2.43324	0.331017	1.37226	0.136076	0.510785	1.93859	1.02899
	PM2.5	PM1.0	OC	EC	char-EC	soot-EC	SO42-	NO3-	NH4+	K+	WSOA	WSA	PAHs	Phenols	THM	WSI				PM2.5	PM1.0	OC	EC	char-EC	soot-EC	SO42-	NO3-	NH4+	K+	WSOA	WSA	PAHs	Phenols	THM	WSI				PM2.5	PM1.0	OC	EC	char-EC	soot-EC	SO42-	NO3-	NH4+	K+	WSOA
Nationwide	1007.65	903.125	433.184	134.414	113.366	20.9922	30.4402	4.34981	32.2023	67.4116	25.1745	5.81535	0.480384	2.72124	8.7016	250.269			Nationwide	226.007	205.217	105.885	28.4037	24.596	3.78708	4.15486	0.863569	6.62272	13.469	6.81484	0.999882	0.109281	0.860738	2.07323	48.927			Nationwide	781.646	697.911	327.3	106.01	88.7699	17.2051	26.2854	3.48625	25.5797	53.9428	18.3597
2012 flux concentration of smoke PM2.5																			2012 summer harvest flux concentration of smoke PM2.5																			2012 autumn harvest flux concentration of smoke PM2.5
μg/m³/d	PM2.5	PM1.0	OC	EC	char-EC	soot-EC	SO42-	NO3-	NH4+	K+	WSOA	WSA	PAHs	Phenols	THM	WSI			μg/m³/d	PM2.5	PM1.0	OC	EC	char-EC	soot-EC	SO42-	NO3-	NH4+	K+	WSOA	WSA	PAHs	Phenols	THM	WSI			μg/m³/d	PM2.5	PM1.0	OC	EC	char-EC	soot-EC	SO42-	NO3-	NH4+	K+	WSOA
Beijing	1.01288	0.909839	0.420265	0.129309	0.111757	0.0174449	0.0328092	0.0051375	0.031994	0.0828197	0.0115087	0.00516369	0.000473656	0.00310698	0.00909516	0.290823			Beijing	0.376311	0.343552	0.182385	0.0438173	0.0392945	0.00447413	0.00547011	0.00149332	0.00986967	0.0238834	0.0101595	0.00124822	0.000180449	0.0017368	0.00348917	0.0825555			Beijing	1.58579	1.4195	0.634357	0.206251	0.176974	0.0291187	0.0574144	0.00841726	0.0519059	0.135862	0.0127229
Tianjin	3.08535	2.74968	1.33499	0.374232	0.324327	0.049648	0.10433	0.0148928	0.0877407	0.233108	0.0606297	0.0161684	0.00142277	0.0096125	0.0248882	0.835999			Tianjin	1.39658	1.275	0.676872	0.162616	0.145831	0.0166045	0.0203008	0.00554206	0.0366286	0.0886368	0.0377043	0.00463242	0.000669689	0.00644566	0.0129491	0.306382			Tianjin	4.60525	4.07688	1.92729	0.564687	0.484973	0.0793872	0.179957	0.0233085	0.133742	0.363132	0.0812626
Hebei	4.77852	4.28335	2.07216	0.585237	0.509554	0.075217	0.14768	0.0230043	0.138827	0.365061	0.0841569	0.0234661	0.0022237	0.0158329	0.0406744	1.29201			Hebei	3.17295	2.89673	1.53782	0.369454	0.33132	0.0377245	0.0461224	0.0125912	0.0832181	0.201378	0.085662	0.0105246	0.0015215	0.0146442	0.0294197	0.696083			Hebei	6.22353	5.53131	2.55308	0.779441	0.669965	0.10896	0.239082	0.032376	0.188875	0.512375	0.0828022
Shanxi	2.09756	1.88187	0.870239	0.267241	0.231001	0.0360278	0.0695082	0.0106588	0.0655303	0.171535	0.0246685	0.0107832	0.000979011	0.00636025	0.0185571	0.602953			Shanxi	0.692283	0.632018	0.335525	0.0806087	0.0722884	0.00823085	0.0100631	0.0027472	0.0181568	0.0439373	0.01869	0.00229629	0.000331965	0.00319512	0.00641887	0.151874			Shanxi	3.36232	3.00673	1.35148	0.43521	0.373843	0.061045	0.123009	0.0177792	0.108166	0.286372	0.0300491
Inner Mongolia	0.27496	0.246425	0.11078	0.0363597	0.031207	0.00512904	0.00981598	0.00142475	0.00883084	0.0230502	0.00273944	0.00149268	0.000128863	0.00074584	0.00242058	0.0810567			Inner Mongolia	0.000714228	0.00064144	0.000311417	0.00010302	8.40552e-05	1.89539e-05	1.86529e-05	2.51757e-06	2.53439e-05	3.70071e-05	2.60657e-05	4.74897e-06	3.511e-07	1.56195e-06	6.41008e-06	0.000150461			Inner Mongolia	0.52186	0.467702	0.210239	0.0689998	0.0592258	0.00972904	0.0186347	0.00270508	0.0167579	0.0437671	0.0051836
Liaoning	3.85167	3.4493	1.56823	0.518026	0.437839	0.0798966	0.131546	0.0187455	0.129371	0.297643	0.0582024	0.0225099	0.00181826	0.00975331	0.0343229	1.07652			Liaoning	0	0	0	0	0	0	0	0	0	0	0	0	0	0	0	0			Liaoning	7.31817	6.55367	2.97964	0.984249	0.831894	0.151804	0.249938	0.0356164	0.245805	0.565523	0.110585
Jilin	5.61575	5.02897	2.27689	0.74947	0.636277	0.11274	0.194996	0.0279692	0.186647	0.446492	0.0746826	0.0321855	0.0026419	0.0145342	0.0499331	1.60114			Jilin	0	0	0	0	0	0	0	0	0	0	0	0	0	0	0	0			Jilin	10.6699	9.55505	4.32609	1.42399	1.20893	0.214206	0.370492	0.0531414	0.35463	0.848335	0.141897
Heilongjiang	4.86201	4.36154	2.01514	0.674046	0.566826	0.10698	0.157969	0.0219806	0.161225	0.346889	0.100042	0.0287867	0.0023297	0.011856	0.0426722	1.27109			Heilongjiang	0.00674694	0.0061596	0.00327001	0.000785607	0.000704518	8.02174e-05	9.80744e-05	2.6774e-05	0.000176955	0.00042821	0.000182152	2.23795e-05	3.23531e-06	3.11394e-05	6.25579e-05	0.00148015			Heilongjiang	9.23175	8.28138	3.82582	1.27998	1.07634	0.20319	0.300052	0.0417391	0.306168	0.658703	0.189916
Shanghai	3.71378	3.3348	1.62956	0.525204	0.431808	0.0933132	0.0977105	0.0134346	0.127401	0.199225	0.131582	0.0237872	0.00181587	0.00873321	0.0328655	0.795278			Shanghai	1.29687	1.18397	0.628547	0.151006	0.135419	0.015419	0.0188514	0.00514638	0.0340135	0.0823086	0.0350124	0.00430169	0.000621876	0.00598548	0.0120246	0.284508			Shanghai	5.889	5.27055	2.53048	0.861982	0.698558	0.163418	0.168684	0.020894	0.211449	0.304449	0.218494
Jiangsu	11.7739	10.5829	5.22383	1.60544	1.34016	0.264816	0.305732	0.0446677	0.382146	0.674672	0.386278	0.0694389	0.00570824	0.0317726	0.103093	2.60179			Jiangsu	6.59239	6.0185	3.1951	0.767611	0.688379	0.0783798	0.0958279	0.0261607	0.172901	0.418401	0.177979	0.0218668	0.00316119	0.0304261	0.0611249	1.44624			Jiangsu	16.4373	14.6909	7.04968	2.35948	1.92676	0.432609	0.494645	0.0613239	0.570467	0.905317	0.573748
Zhejiang	3.33641	2.9894	1.4409	0.486954	0.396469	0.0904805	0.0941489	0.0118575	0.117508	0.174128	0.122983	0.022812	0.00163925	0.00666839	0.029123	0.709757			Zhejiang	0.785478	0.707438	0.34906	0.109539	0.0906468	0.0188643	0.0189481	0.00282867	0.0266207	0.0422743	0.027382	0.00477223	0.000384495	0.00204607	0.00708971	0.16665			Zhejiang	5.63224	5.04316	2.42356	0.826627	0.671709	0.154935	0.16183	0.0199834	0.199307	0.292796	0.209025
Anhui	8.86683	7.97344	3.95671	1.17486	0.992933	0.181468	0.231208	0.0350983	0.275294	0.537577	0.269489	0.0489729	0.00426711	0.0261279	0.0768594	2.02034			Anhui	7.01515	6.3898	3.35202	0.844257	0.745609	0.0978538	0.113395	0.027401	0.193119	0.433738	0.19876	0.0265556	0.00337581	0.0299821	0.0647516	1.53039			Anhui	10.5333	9.39872	4.50094	1.47241	1.21552	0.25672	0.33724	0.0420259	0.349251	0.631031	0.333146
Fujian	1.73539	1.55584	0.744166	0.256767	0.208182	0.0485857	0.0486675	0.00611761	0.0627242	0.0897154	0.0638085	0.0120929	0.00085582	0.00329879	0.0153928	0.368359			Fujian	0.872038	0.781434	0.374551	0.129026	0.104175	0.0248505	0.0241251	0.0030221	0.0320236	0.0438246	0.0329328	0.00618696	0.000430083	0.00162378	0.00779173	0.182689			Fujian	2.51241	2.25281	1.07682	0.371735	0.301789	0.0699474	0.0707557	0.00890356	0.0903549	0.131017	0.0915967
Jiangxi	2.95559	2.64337	1.27422	0.431836	0.349638	0.0822037	0.0848883	0.0103791	0.105674	0.150314	0.112412	0.0208619	0.0014499	0.00558408	0.0257061	0.623779			Jiangxi	2.39518	2.14622	1.02841	0.354589	0.286227	0.0683611	0.0663467	0.00829744	0.0880241	0.120286	0.0905232	0.0170174	0.00118137	0.00444244	0.021399	0.501719			Jiangxi	3.45997	3.09081	1.49544	0.501359	0.406708	0.094662	0.101576	0.0122526	0.121559	0.177339	0.132112
Shandong	10.2951	9.24324	4.51884	1.25518	1.09532	0.158833	0.301971	0.0485746	0.296113	0.770497	0.193851	0.0491501	0.00480543	0.0353199	0.0882158	2.72514			Shandong	8.25669	7.53792	4.00173	0.961401	0.862166	0.0981674	0.12002	0.0327652	0.216552	0.524029	0.222911	0.0273873	0.00395926	0.0381074	0.0765564	1.81136			Shandong	12.1298	10.778	4.98424	1.51958	1.30516	0.213432	0.465727	0.0628031	0.367718	0.992319	0.167696
Henan	8.84751	7.98621	3.94723	1.09945	0.95769	0.140877	0.224767	0.03949	0.259083	0.627945	0.186954	0.0406162	0.00419065	0.0315511	0.0788036	2.22391			Henan	9.05213	8.26411	4.38725	1.05402	0.945226	0.107625	0.131583	0.0359217	0.237414	0.574513	0.244386	0.0300257	0.00434069	0.0417786	0.0839317	1.98586			Henan	8.66335	7.7361	3.5512	1.14034	0.968909	0.170804	0.308633	0.0427015	0.278586	0.676035	0.135264
Hubei	3.41338	3.04644	1.49211	0.464812	0.384768	0.0799625	0.102946	0.013245	0.110857	0.196564	0.115281	0.0218524	0.0016377	0.00807674	0.0283979	0.772641			Hubei	1.53239	1.38692	0.703193	0.201005	0.170785	0.030114	0.0316784	0.00572091	0.0477075	0.0877937	0.0490829	0.00778869	0.000744605	0.00510051	0.013967	0.329097			Hubei	5.10628	4.54	2.20213	0.702237	0.577353	0.124826	0.167087	0.0200167	0.167692	0.294457	0.17486
Hunan	5.25291	4.69662	2.25523	0.759151	0.617311	0.141811	0.154463	0.0191622	0.185816	0.28066	0.188821	0.0364424	0.00256438	0.0102931	0.0455689	1.14386			Hunan	2.96404	2.65633	1.27391	0.438089	0.353865	0.0842199	0.0818061	0.0102795	0.108692	0.149155	0.111778	0.0209733	0.00146164	0.00556007	0.0264889	0.621104			Hunan	7.31289	6.53288	3.13841	1.04811	0.854412	0.193643	0.219855	0.0271565	0.255227	0.399014	0.258159
Guangdong	2.84792	2.55222	1.21669	0.418439	0.339509	0.0789134	0.0808478	0.0102629	0.103302	0.150993	0.101181	0.0198033	0.00139963	0.00548124	0.0253678	0.616172			Guangdong	2.59139	2.32196	1.11241	0.383774	0.30974	0.0740337	0.0718391	0.00897498	0.0952809	0.130083	0.0979859	0.018428	0.00127821	0.00479434	0.0231505	0.542777			Guangdong	3.07879	2.75945	1.31054	0.449638	0.3663	0.083305	0.0889557	0.011422	0.110521	0.169812	0.104056
Guangxi	2.38877	2.14047	1.01157	0.345355	0.282353	0.0629566	0.0705005	0.00918393	0.0852861	0.137751	0.0756078	0.0160892	0.00116523	0.00487738	0.0212545	0.545517			Guangxi	1.86111	1.6676	0.798909	0.275631	0.222456	0.0531747	0.0515976	0.0064456	0.0684325	0.0934205	0.0703753	0.0132358	0.000918002	0.00344252	0.0166264	0.389814			Guangxi	2.86367	2.56605	1.20297	0.408106	0.33626	0.0717603	0.0875131	0.0116484	0.100454	0.177648	0.0803171
Hainan	2.63169	2.35839	1.12422	0.386632	0.313673	0.0729427	0.074718	0.00948471	0.0955037	0.13952	0.0934873	0.018308	0.00129328	0.00506258	0.0234472	0.569471			Hainan	2.29301	2.05459	0.984271	0.339619	0.274092	0.0655269	0.0635814	0.00794105	0.0843212	0.115091	0.086715	0.0163101	0.00113105	0.00423941	0.0204846	0.48027			Hainan	2.9365	2.63181	1.25018	0.428943	0.349295	0.0796169	0.0847409	0.010874	0.105568	0.161506	0.0995824
Chongqing	3.19743	2.8683	1.34814	0.45131	0.374348	0.0768478	0.0968061	0.0132245	0.109728	0.203594	0.0856311	0.0200676	0.00154719	0.00733809	0.0283319	0.774178			Chongqing	0.260258	0.237601	0.126138	0.0303041	0.0271762	0.00309432	0.00378314	0.00103278	0.00682588	0.0165178	0.00702634	0.000863269	0.000124799	0.00120118	0.00241312	0.0570955			Chongqing	5.84088	5.23593	2.44794	0.830215	0.686804	0.143226	0.180527	0.024197	0.202339	0.371963	0.156375
Sichuan	1.5277	1.37243	0.65367	0.212527	0.176995	0.0354658	0.0437482	0.00623423	0.0516698	0.0959216	0.041949	0.00927114	0.000739125	0.00379163	0.0136264	0.363809			Sichuan	0.404142	0.36896	0.195874	0.0470579	0.0422006	0.00480502	0.00587466	0.00160376	0.0105996	0.0256498	0.0109109	0.00134053	0.000193795	0.00186525	0.00374722	0.0886611			Sichuan	2.53891	2.27556	1.06569	0.361449	0.29831	0.0630605	0.0778345	0.0104017	0.088633	0.159166	0.0698833
Guizhou	1.37711	1.23521	0.577578	0.190571	0.159121	0.03138	0.0425401	0.00597122	0.046777	0.0928257	0.0324197	0.008381	0.00066128	0.00334292	0.0122539	0.346998			Guizhou	0.166386	0.151901	0.0806414	0.0193738	0.0173741	0.00197823	0.00241861	0.000660272	0.00436387	0.01056	0.00449203	0.000551899	7.97856e-05	0.000767926	0.00154274	0.0365019			Guizhou	2.46677	2.21019	1.02482	0.344648	0.286694	0.0578417	0.0786494	0.0107511	0.0849488	0.166865	0.0575546
Yunnan	1.03884	0.932425	0.435188	0.144299	0.121003	0.0232482	0.0324542	0.00454538	0.0345975	0.0712314	0.0237332	0.00618943	0.000499528	0.00254898	0.00915469	0.263558			Yunnan	0.160301	0.145384	0.0745396	0.0204672	0.0175986	0.00285529	0.00308071	0.000607386	0.00480427	0.00941861	0.00494331	0.000747684	7.76496e-05	0.000582449	0.00146706	0.034602			Yunnan	1.82952	1.64076	0.759771	0.255748	0.214066	0.0416018	0.0588903	0.00808958	0.0614115	0.126863	0.0406441
Tibet	0.00344424	0.00313755	0.00162497	0.000418555	0.000372474	4.57124e-05	6.26721e-05	1.41056e-05	9.13532e-05	0.000227376	8.72837e-05	1.24831e-05	1.65632e-06	1.46208e-05	3.11533e-05	0.000785155			Tibet	0.00441487	0.00403054	0.00213973	0.000514063	0.000461002	5.24903e-05	6.41751e-05	1.75196e-05	0.000115791	0.000280199	0.000119191	1.4644e-05	2.11703e-06	2.03761e-05	4.09348e-05	0.000968538			Tibet	0.00257068	0.00233386	0.00116168	0.000332598	0.000292799	3.96123e-05	6.13193e-05	1.10329e-05	6.93595e-05	0.000179834	5.85671e-05
Shannxi	1.69242	1.52233	0.728566	0.214689	0.185892	0.0286395	0.0500623	0.00800017	0.0510742	0.127817	0.0294473	0.00835862	0.000797278	0.0054699	0.0148867	0.452232			Shannxi	1.06379	0.971187	0.515584	0.123867	0.111082	0.0126479	0.0154634	0.00422147	0.0279005	0.067516	0.0287199	0.00352858	0.000510112	0.00490976	0.00986353	0.233376			Shannxi	2.25818	2.01836	0.92025	0.296429	0.253222	0.0430318	0.0812014	0.011401	0.0719305	0.182087	0.030102
Gansu	0.45199	0.40583	0.192874	0.0566004	0.0492324	0.00732416	0.0141732	0.00221683	0.0134249	0.0355421	0.00685217	0.00221737	0.000211292	0.00146137	0.00391643	0.124852			Gansu	0.162532	0.148383	0.0787736	0.018925	0.0169716	0.00193241	0.00236259	0.000644978	0.00426279	0.0103154	0.00438798	0.000539115	7.79376e-05	0.000750139	0.001507	0.0356564			Gansu	0.712502	0.637533	0.295565	0.0905082	0.0782671	0.0121767	0.0248027	0.0036315	0.0216709	0.0582461	0.00906993
Qinghai	0.0125733	0.0114081	0.00568229	0.00157625	0.00139223	0.000182823	0.000295246	5.55974e-05	0.000345725	0.000902981	0.000259641	5.07457e-05	6.01526e-06	4.80121e-05	0.0001117	0.00311349			Qinghai	0	0	0	0	0	0	0	0	0	0	0	0	0	0	0	0			Qinghai	0.0238893	0.0216753	0.0107964	0.00299488	0.00264523	0.000347364	0.000560968	0.000105635	0.000656877	0.00171566	0.000493317
Ningxia	1.19175	1.07035	0.499359	0.15737	0.133961	0.0233109	0.0371031	0.00561353	0.0387918	0.089122	0.0205526	0.00654251	0.000564342	0.00337268	0.0106849	0.32108			Ningxia	0	0	0	0	0	0	0	0	0	0	0	0	0	0	0	0			Ningxia	2.26433	2.03367	0.948783	0.299003	0.254526	0.0442908	0.0704959	0.0106657	0.0737043	0.169332	0.0390499
Xinjiang	0.343265	0.296923	0.159406	0.0344393	0.0303891	0.00403981	0.015332	0.00162327	0.00655469	0.023408	0.0121524	0.00199325	0.00014818	0.00104836	0.00175824	0.0882215			Xinjiang	0.0859742	0.0784899	0.0416687	0.0100108	0.00897745	0.00102219	0.00124973	0.000341173	0.00225488	0.00545654	0.0023211	0.000285175	4.12265e-05	0.0003968	0.000797156	0.0188611			Xinjiang	0.574826	0.493513	0.265369	0.056425	0.0496595	0.00675567	0.0280061	0.00277716	0.0104245	0.0395644	0.0210005
	PM2.5	PM1.0	OC	EC	char-EC	soot-EC	SO42-	NO3-	NH4+	K+	WSOA	WSA	PAHs	Phenols	THM	WSI				PM2.5	PM1.0	OC	EC	char-EC	soot-EC	SO42-	NO3-	NH4+	K+	WSOA	WSA	PAHs	Phenols	THM	WSI				PM2.5	PM1.0	OC	EC	char-EC	soot-EC	SO42-	NO3-	NH4+	K+	WSOA
Nationwide	1.8707	1.67665	0.804205	0.249539	0.210463	0.038972	0.0565123	0.00807543	0.0597836	0.12515	0.0467365	0.0107962	0.000891833	0.00505198	0.0161545	0.464624			Nationwide	0.885785	0.804302	0.414992	0.111322	0.0963984	0.0148426	0.016284	0.00338457	0.0259563	0.0527887	0.0267093	0.00391881	0.000428302	0.00337347	0.00812556	0.191758			Nationwide	2.75714	2.46178	1.1545	0.373936	0.313123	0.0606885	0.0927179	0.0122972	0.0902284	0.190275	0.0647612
[truncated: 5 more columns]

## Sheet: CRC version
2012 total emission from filed burning																			2012 summer harvest emission from filed burning																			2012 autumn harvest emission from filed burning
Gg	PM2.5	PM1.0	OC	EC	char-EC	soot-EC	SO42-	NO3-	NH4+	K+	WSOA	WSA	PAHs	Phenols	THM	WSI			Gg	PM2.5	PM1.0	OC	EC	char-EC	soot-EC	SO42-	NO3-	NH4+	K+	WSOA	WSA	PAHs	Phenols	THM	WSI			Gg	PM2.5	PM1.0	OC	EC	char-EC	soot-EC	SO42-	NO3-	NH4+	K+	WSOA
Beijing	0.232838	0.209152	0.0966096	0.0297252	0.0256905	0.0040102	0.00754211	0.001181	0.00735471	0.0190384	0.00264558	0.00118702	0.000108883	0.000714225	0.00209077	0.0668537			Beijing	0.0409763	0.0374092	0.0198598	0.00477124	0.00427876	0.000487185	0.000595637	0.000162607	0.0010747	0.00260065	0.00110626	0.000135918	1.9649e-05	0.000189119	0.000379934	0.00898942			Beijing	0.191862	0.171743	0.0767498	0.024954	0.0214118	0.00352302	0.00694647	0.00101839	0.00628001	0.0164378	0.00153932
Tianjin	0.182473	0.162621	0.0789535	0.0221327	0.0191812	0.00293627	0.00617027	0.000880786	0.00518914	0.0137864	0.00358575	0.000956228	8.41452e-05	0.0005685	0.00147193	0.0494424			Tianjin	0.0391244	0.0357185	0.0189622	0.00455561	0.00408538	0.000465167	0.000568717	0.000155258	0.00102613	0.00248312	0.00105627	0.000129775	1.8761e-05	0.000180572	0.000362763	0.00858314			Tianjin	0.143349	0.126902	0.0599913	0.0175771	0.0150959	0.0024711	0.00560155	0.000725528	0.00416301	0.0113033	0.00252948
Hebei	2.67795	2.40045	1.16127	0.327975	0.285562	0.0421527	0.0827621	0.0128919	0.0778007	0.204585	0.0471627	0.0131507	0.0012462	0.00887299	0.0227945	0.724063			Hebei	0.842289	0.768965	0.408228	0.0980752	0.087952	0.0100143	0.0122436	0.00334247	0.022091	0.0534577	0.0227398	0.00279386	0.000403896	0.00388744	0.00780973	0.184782			Hebei	1.83566	1.63149	0.753043	0.2299	0.19761	0.0321384	0.0705185	0.00954946	0.0557097	0.151128	0.0244229
Shanxi	2.27247	2.03878	0.942802	0.289524	0.250263	0.0390319	0.075304	0.0115476	0.0709944	0.185838	0.0267254	0.0116824	0.00106064	0.00689059	0.0201045	0.65323			Shanxi	0.355267	0.32434	0.172186	0.0413669	0.0370971	0.00422392	0.00516421	0.00140981	0.00931773	0.0225478	0.00959137	0.00117841	0.000170358	0.00163967	0.00329405	0.0779387			Shanxi	1.9172	1.71444	0.770617	0.248157	0.213166	0.034808	0.0701398	0.0101377	0.0616767	0.16329	0.017134
Inner Mongolia	17.9479	16.0852	7.23107	2.37336	2.03702	0.334795	0.640732	0.0929999	0.576428	1.50459	0.178816	0.0974336	0.00841144	0.0486843	0.158002	5.29093			Inner Mongolia	0.0220835	0.019833	0.00962884	0.00318533	0.00259894	0.000586043	0.000576737	7.78418e-05	0.00078362	0.00114424	0.000805935	0.000146835	1.08558e-05	4.82945e-05	0.000198196	0.00465218			Inner Mongolia	17.9285	16.0679	7.22275	2.37049	2.0347	0.334241	0.640195	0.0929328	0.575715	1.50362	0.178082
Liaoning	2.39043	2.14072	0.973281	0.321499	0.271733	0.0495857	0.0816406	0.0116339	0.0802908	0.184724	0.0361218	0.0139702	0.00112846	0.00605313	0.0213016	0.668113			Liaoning	0	0	0	0	0	0	0	0	0	0	0	0	0	0	0	0			Liaoning	2.39043	2.14072	0.973281	0.321499	0.271733	0.0495857	0.0816406	0.0116339	0.0802908	0.184724	0.0361218
Jilin	3.07928	2.75753	1.24848	0.410956	0.348889	0.0618186	0.106922	0.0153363	0.102344	0.244825	0.0409506	0.0176482	0.00144863	0.00796951	0.0273798	0.877951			Jilin	0	0	0	0	0	0	0	0	0	0	0	0	0	0	0	0			Jilin	3.07928	2.75753	1.24848	0.410956	0.348889	0.0618186	0.106922	0.0153363	0.102344	0.244825	0.0409506
Heilongjiang	7.89522	7.08252	3.2723	1.09456	0.920446	0.17372	0.256519	0.0356934	0.261807	0.563299	0.162454	0.0467455	0.0037831	0.0192525	0.0692936	2.06408			Heilongjiang	0.00518973	0.00473794	0.00251528	0.000604286	0.000541913	6.17029e-05	7.54385e-05	2.05945e-05	0.000136113	0.000329377	0.00014011	1.72142e-05	2.48859e-06	2.39523e-05	4.81193e-05	0.00113853			Heilongjiang	7.89003	7.07778	3.26978	1.09395	0.919905	0.173659	0.256443	0.0356728	0.26167	0.562969	0.162314
Shanghai	0.118619	0.106514	0.0520488	0.0167752	0.0137921	0.00298045	0.0031209	0.000429105	0.00406922	0.00636329	0.00420276	0.000759771	5.79993e-05	0.000278941	0.00104973	0.0254014			Shanghai	0.0196211	0.017913	0.00950967	0.00228466	0.00204884	0.000233284	0.000285215	7.78627e-05	0.000514611	0.0012453	0.000529724	6.50828e-05	9.40875e-06	9.05579e-05	0.000181928	0.00430449			Shanghai	0.0989981	0.0886015	0.0425391	0.0144905	0.0117432	0.00274717	0.00283569	0.000351242	0.00355461	0.00511799	0.00367304
Jiangsu	1.72649	1.55185	0.766008	0.235417	0.196517	0.0388319	0.0448317	0.00654995	0.0560369	0.0989322	0.0566428	0.0101823	0.000837041	0.00465905	0.0151173	0.38152			Jiangsu	0.457906	0.418044	0.221931	0.0533181	0.0478147	0.00544425	0.00665618	0.00181712	0.0120097	0.029062	0.0123624	0.00151887	0.000219576	0.00211339	0.00424572	0.100456			Jiangsu	1.26859	1.1338	0.544077	0.182099	0.148703	0.0333877	0.0381755	0.00473283	0.0440272	0.0698701	0.0442804
Zhejiang	2.19302	1.96493	0.947106	0.320075	0.260599	0.0594728	0.061884	0.0077939	0.0772383	0.114454	0.080837	0.0149944	0.00107748	0.00438313	0.0191425	0.466523			Zhejiang	0.24456	0.220262	0.108681	0.0341052	0.0282231	0.00587346	0.00589955	0.000880712	0.00828842	0.0131622	0.00852544	0.00148585	0.000119714	0.00063705	0.0022074	0.0518868			Zhejiang	1.94846	1.74467	0.838425	0.285969	0.232376	0.0535993	0.0559845	0.00691319	0.0689499	0.101292	0.0723116
Anhui	2.25544	2.02819	1.00646	0.298848	0.252571	0.0461597	0.0588121	0.00892791	0.0700261	0.136743	0.0685497	0.0124572	0.00108542	0.00664611	0.0195506	0.513911			Anhui	0.845258	0.76991	0.403886	0.101725	0.0898387	0.0117904	0.013663	0.00330155	0.023269	0.0522613	0.0239486	0.0031997	0.000406753	0.00361255	0.00780195	0.184397			Anhui	1.41018	1.25828	0.602578	0.197123	0.162732	0.0343693	0.0451491	0.00562635	0.0467571	0.0844813	0.044601
Fujian	2.65296	2.37847	1.13763	0.39253	0.318256	0.0742748	0.0743999	0.00935222	0.0958889	0.137151	0.0975465	0.0184869	0.00130832	0.00504298	0.0235316	0.563124			Fujian	0.631476	0.565867	0.271227	0.0934327	0.0754371	0.0179952	0.0174699	0.00218842	0.0231895	0.0317351	0.0238479	0.00448022	0.00031144	0.00117585	0.00564229	0.132292			Fujian	2.02148	1.81261	0.866407	0.299097	0.242819	0.0562796	0.05693	0.0071638	0.0726994	0.105416	0.0736986
Jiangxi	3.75874	3.36167	1.62047	0.549182	0.444648	0.104542	0.107956	0.0131995	0.13439	0.19116	0.142959	0.0265308	0.00184389	0.00710148	0.0326914	0.793283			Jiangxi	1.44286	1.29288	0.619515	0.213605	0.172424	0.0411809	0.0399674	0.0049984	0.0530259	0.0724608	0.0545314	0.0102513	0.000711662	0.00267613	0.0128908	0.302237			Jiangxi	2.31588	2.06879	1.00095	0.335577	0.272224	0.0633607	0.0679882	0.00820109	0.0813637	0.118699	0.0884273
Shandong	2.13837	1.91988	0.938593	0.260709	0.227506	0.0329906	0.0627215	0.0100893	0.0615046	0.160037	0.0402641	0.0102088	0.000998121	0.00733618	0.018323	0.566031			Shandong	0.812354	0.741636	0.39372	0.0945897	0.0848263	0.00965844	0.0118085	0.00322368	0.0213059	0.0515578	0.0219316	0.00269456	0.000389542	0.00374928	0.00753218	0.178215			Shandong	1.32602	1.17825	0.544873	0.166119	0.142679	0.0233322	0.050913	0.00686559	0.0401986	0.10848	0.0183324
Henan	2.19655	1.98272	0.979969	0.272958	0.237764	0.0349752	0.0558024	0.0098041	0.064322	0.155899	0.0464145	0.0100837	0.0010404	0.00783312	0.0195644	0.552125			Henan	1.06453	0.971863	0.515943	0.123953	0.111159	0.0126567	0.0154742	0.00422441	0.02792	0.067563	0.0287399	0.00353104	0.000510467	0.00491318	0.0098704	0.233538			Henan	1.13202	1.01085	0.464026	0.149005	0.126605	0.0223185	0.0403282	0.00557969	0.0364021	0.0883355	0.0176746
Hubei	3.68819	3.2917	1.61223	0.502233	0.415745	0.0864001	0.111234	0.0143114	0.119782	0.212389	0.124562	0.0236117	0.00176955	0.00872698	0.0306842	0.834845			Hubei	0.784306	0.709855	0.359908	0.102878	0.0874112	0.0154129	0.0162136	0.00292808	0.0244177	0.0449345	0.0251216	0.00398641	0.000381104	0.00261054	0.00714859	0.168438			Hubei	2.90388	2.58184	1.25233	0.399354	0.328334	0.0709872	0.0950205	0.0113833	0.0953647	0.167454	0.0994407
Hunan	4.62636	4.13643	1.98623	0.668603	0.543681	0.124896	0.13604	0.0168766	0.163652	0.247184	0.166299	0.0320957	0.00225851	0.00906541	0.0401336	1.00743			Hunan	1.23655	1.10818	0.531457	0.182764	0.147627	0.0351353	0.0341283	0.00428847	0.0453446	0.0622253	0.0466322	0.00874975	0.000609776	0.00231958	0.0110508	0.259115			Hunan	3.38981	3.02824	1.45478	0.485839	0.396053	0.0897611	0.101911	0.0125881	0.118308	0.184959	0.119667
Guangdong	3.77619	3.38411	1.61327	0.554829	0.450171	0.104635	0.1072	0.0136081	0.136973	0.200209	0.13416	0.0262581	0.00185584	0.00726784	0.0336364	0.817012			Guangdong	1.6276	1.45838	0.698685	0.241041	0.194542	0.0464992	0.0451208	0.00563701	0.0598441	0.0817024	0.061543	0.0115742	0.00080282	0.00301123	0.0145404	0.340908			Guangdong	2.14859	1.92573	0.914581	0.313788	0.255629	0.0581359	0.0620793	0.00797107	0.0771293	0.118506	0.0726175
Guangxi	4.78609	4.2886	2.02677	0.691945	0.565717	0.126138	0.141253	0.0184007	0.170877	0.275995	0.151486	0.0322361	0.00233462	0.00977221	0.0425851	1.09298			Guangxi	1.76631	1.58266	0.758215	0.261591	0.211125	0.0504661	0.0489694	0.00611728	0.0649468	0.088662	0.0667906	0.0125616	0.000871242	0.00326717	0.0157795	0.369958			Guangxi	3.01978	2.70594	1.26855	0.430354	0.354591	0.0756723	0.0922838	0.0122834	0.105931	0.187333	0.0846956
Hainan	0.724529	0.649287	0.309509	0.106443	0.086357	0.0200818	0.0205706	0.00261123	0.0262931	0.0384111	0.0257379	0.00504036	0.000356052	0.00139378	0.00645522	0.156781			Hainan	0.299031	0.267938	0.128358	0.0442897	0.0357443	0.00854535	0.00829163	0.00103559	0.0109963	0.015009	0.0113085	0.002127	0.0001475	0.00055286	0.00267139	0.0626319			Hainan	0.425498	0.381348	0.18115	0.0621537	0.0506127	0.0115365	0.0122789	0.00157564	0.0152968	0.0234021	0.0144295
Chongqing	1.52532	1.36831	0.643126	0.215296	0.178582	0.03666	0.046181	0.0063087	0.0523452	0.0971241	0.0408501	0.00957319	0.000738083	0.00350061	0.0135156	0.369319			Chongqing	0.0588103	0.0536907	0.0285033	0.00684781	0.00614099	0.000699222	0.000854874	0.000233378	0.00154244	0.00373253	0.00158774	0.000195073	2.82008e-05	0.000271429	0.000545292	0.0129019			Chongqing	1.46651	1.31462	0.614623	0.208448	0.172441	0.0359608	0.0453262	0.00607532	0.0508028	0.0933916	0.0392623
Sichuan	8.45588	7.59646	3.61808	1.17634	0.979673	0.196304	0.242148	0.0345066	0.285994	0.530928	0.232189	0.051316	0.00409108	0.0209868	0.0754224	2.01369			Sichuan	1.0596	0.96736	0.513552	0.123379	0.110644	0.0125981	0.0154025	0.00420483	0.0277906	0.06725	0.0286068	0.00351468	0.000508102	0.00489041	0.00982467	0.232456			Sichuan	7.39628	6.6291	3.10453	1.05296	0.869029	0.183706	0.226745	0.0303018	0.258203	0.463678	0.203582
Guizhou	3.08288	2.76521	1.293	0.426623	0.356218	0.0702491	0.0952327	0.0133675	0.104718	0.207805	0.0725765	0.0187622	0.00148038	0.00748365	0.0274324	0.776809			Guizhou	0.176438	0.161079	0.0855135	0.0205443	0.0184237	0.00209775	0.00256473	0.000700163	0.00462752	0.011198	0.00476342	0.000585243	8.4606e-05	0.000814321	0.00163594	0.0387072			Guizhou	2.90645	2.60413	1.20749	0.406079	0.337795	0.0681514	0.092668	0.0126673	0.10009	0.196607	0.0678131
Yunnan	6.73461	6.04477	2.82125	0.935469	0.784441	0.150714	0.210395	0.029467	0.22429	0.461782	0.153859	0.0401251	0.00323836	0.0165247	0.0593484	1.7086			Yunnan	0.492257	0.446447	0.228898	0.0628512	0.0540421	0.00876809	0.00946031	0.00186517	0.0147531	0.0289228	0.01518	0.002296	0.000238448	0.0017886	0.00450507	0.106257			Yunnan	6.24235	5.59832	2.59235	0.872618	0.730399	0.141946	0.200935	0.0276018	0.209537	0.432859	0.138679
Tibet	1.97058	1.79511	0.929706	0.239471	0.213106	0.0261538	0.0358571	0.00807032	0.0522666	0.13009	0.0499383	0.00714208	0.000947641	0.00836511	0.017824	0.449217			Tibet	1.19649	1.09233	0.579895	0.139318	0.124937	0.0142255	0.0173923	0.00474803	0.0313807	0.0759376	0.0323023	0.00396872	0.000573741	0.00552218	0.0110939	0.262486			Tibet	0.774097	0.702783	0.34981	0.100154	0.088169	0.0119283	0.0184648	0.00332229	0.0208859	0.0541526	0.017636
Shannxi	2.92947	2.63506	1.2611	0.371613	0.321768	0.0495731	0.0866548	0.0138478	0.0884063	0.221242	0.0509715	0.0144683	0.00138004	0.00946806	0.0257679	0.782786			Shannxi	0.872223	0.796293	0.422736	0.101561	0.0910778	0.0103702	0.0126787	0.00346126	0.0228762	0.0553576	0.023548	0.00289315	0.00041825	0.0040256	0.00808729	0.191349			Shannxi	2.05725	1.83876	0.838366	0.270052	0.23069	0.0392029	0.073976	0.0103865	0.0655301	0.165885	0.0274235
Gansu	5.78763	5.19657	2.46972	0.724756	0.630411	0.0937843	0.181485	0.028386	0.171903	0.455109	0.0877405	0.0283929	0.00270555	0.0187126	0.050149	1.5987			Gansu	0.985825	0.900006	0.477795	0.114788	0.10294	0.0117209	0.0143301	0.00391207	0.0258557	0.0625676	0.026615	0.00326996	0.000472725	0.00454991	0.00914061	0.216271			Gansu	4.80181	4.29656	1.99192	0.609968	0.52747	0.0820634	0.167155	0.024474	0.146048	0.392542	0.0611256
Qinghai	3.94497	3.57936	1.78286	0.494561	0.436822	0.0573622	0.0926357	0.0174441	0.108474	0.283317	0.0814642	0.0159218	0.00188733	0.0150642	0.0350468	0.976879			Qinghai	0	0	0	0	0	0	0	0	0	0	0	0	0	0	0	0			Qinghai	3.94497	3.57936	1.78286	0.494561	0.436822	0.0573622	0.0926357	0.0174441	0.108474	0.283317	0.0814642
Ningxia	0.794727	0.713773	0.333001	0.104943	0.0893329	0.0155451	0.0247425	0.00374342	0.0258686	0.0594316	0.0137056	0.00436292	0.000376335	0.00224909	0.00712532	0.214115			Ningxia	0	0	0	0	0	0	0	0	0	0	0	0	0	0	0	0			Ningxia	0.794727	0.713773	0.333001	0.104943	0.0893329	0.0155451	0.0247425	0.00374342	0.0258686	0.0594316	0.0137056
Xinjiang	39.7997	34.4266	18.4822	3.99305	3.52345	0.468394	1.77767	0.18821	0.759981	2.71403	1.409	0.231107	0.0171807	0.121551	0.203858	10.2288			Xinjiang	4.7218	4.31075	2.28849	0.549802	0.493052	0.0561396	0.0686367	0.0187376	0.123841	0.29968	0.127477	0.0156621	0.00226421	0.0217927	0.0437807	1.03587			Xinjiang	35.0779	30.1158	16.1937	3.44325	3.0304	0.412254	1.70903	0.169472	0.63614	2.41435	1.28153
	PM2.5	PM1.0	OC	EC	char-EC	soot-EC	SO42-	NO3-	NH4+	K+	WSOA	WSA	PAHs	Phenols	THM	WSI				PM2.5	PM1.0	OC	EC	char-EC	soot-EC	SO42-	NO3-	NH4+	K+	WSOA	WSA	PAHs	Phenols	THM	WSI				PM2.5	PM1.0	OC	EC	char-EC	soot-EC	SO42-	NO3-	NH4+	K+	WSOA
Nationwide	146.346	130.043	63.6351	18.4224	15.6859	2.72917	5.03642	0.65747	4.23751	10.0565	3.83042	0.846891	0.0681202	0.402419	1.14039	37.2845			Nationwide	22.1007	20.0444	10.2778	2.82123	2.42603	0.393349	0.424492	0.0837497	0.662169	1.29879	0.681333	0.103013	0.0107053	0.0803535	0.20227	4.77076			Nationwide	124.248	110.001	53.3586	15.6015	13.2602	2.33585	4.61196	0.573731	3.57541	8.75786	3.14916
2012 flux concentration of smoke PM2.5																			2012 summer harvest flux concentration of smoke PM2.5																			2012 autumn harvest flux concentration of smoke PM2.5
μg/m³/d	PM2.5	PM1.0	OC	EC	char-EC	soot-EC	SO42-	NO3-	NH4+	K+	WSOA	WSA	PAHs	Phenols	THM	WSI			μg/m³/d	PM2.5	PM1.0	OC	EC	char-EC	soot-EC	SO42-	NO3-	NH4+	K+	WSOA	WSA	PAHs	Phenols	THM	WSI			μg/m³/d	PM2.5	PM1.0	OC	EC	char-EC	soot-EC	SO42-	NO3-	NH4+	K+	WSOA
Beijing	0.249534	0.22415	0.103537	0.0318568	0.0275328	0.00429777	0.00808294	0.00126568	0.0078821	0.0204036	0.00283529	0.00127213	0.000116691	0.000765441	0.0022407	0.0716476			Beijing	0.0927087	0.0846381	0.0449327	0.0107949	0.00968067	0.00110225	0.00134763	0.000367897	0.00243151	0.00588396	0.00250292	0.000307513	4.44558e-05	0.000427881	0.000859599	0.0203385			Beijing	0.390677	0.34971	0.156281	0.0508124	0.0435997	0.00717373	0.0141447	0.00207369	0.0127876	0.0334713	0.00313444
Tianjin	0.27583	0.245821	0.119348	0.0334563	0.0289947	0.00443853	0.0093271	0.00133141	0.00784401	0.0208398	0.00542028	0.00144545	0.000127196	0.000859356	0.002225	0.0747382			Tianjin	0.124854	0.113985	0.0605122	0.0145378	0.0130373	0.00148444	0.00181489	0.000495459	0.00327459	0.00792412	0.00337076	0.000414137	5.98701e-05	0.000576241	0.00115765	0.0273905			Tianjin	0.411708	0.364473	0.1723	0.0504829	0.0433565	0.0070972	0.0160881	0.00208377	0.0119565	0.032464	0.00726486
Hebei	0.251178	0.22515	0.108921	0.0307624	0.0267842	0.00395371	0.00776266	0.0012092	0.00729731	0.0191891	0.00442362	0.00123347	0.000116887	0.000832241	0.00213801	0.0679134			Hebei	0.166783	0.152264	0.0808338	0.01942	0.0174155	0.00198295	0.00242438	0.000661846	0.00437428	0.0105852	0.00450274	0.000553215	7.99759e-05	0.000769758	0.00154642	0.0365889			Hebei	0.327134	0.290748	0.1342	0.0409705	0.035216	0.00572739	0.0125671	0.00170181	0.00992803	0.0269325	0.00435241
Shanxi	0.25494	0.228724	0.10577	0.0324808	0.0280762	0.00437886	0.00844811	0.00129548	0.00796463	0.0208485	0.00299823	0.00131061	0.00011899	0.000773032	0.00225545	0.0732836			Shanxi	0.0841409	0.0768161	0.0407802	0.00979728	0.00878601	0.00100039	0.00122308	0.000333898	0.0022068	0.00534019	0.00227161	0.000279094	4.03474e-05	0.000388338	0.000780157	0.0184589			Shanxi	0.40866	0.365442	0.164261	0.0528959	0.0454373	0.00741948	0.0149506	0.00216091	0.0131467	0.034806	0.0036522
Inner Mongolia	0.274962	0.246427	0.11078	0.03636	0.0312072	0.00512908	0.00981606	0.00142476	0.00883092	0.0230504	0.00273946	0.00149269	0.000128864	0.000745846	0.0024206	0.0810573			Inner Mongolia	0.000714233	0.000641444	0.000311419	0.000103021	8.40558e-05	1.8954e-05	1.8653e-05	2.51759e-06	2.53441e-05	3.70074e-05	2.60658e-05	4.749e-06	3.51103e-07	1.56196e-06	6.41012e-06	0.000150462			Inner Mongolia	0.521864	0.467705	0.210241	0.0690004	0.0592263	0.00972912	0.0186349	0.0027051	0.016758	0.0437674	0.00518364
Liaoning	0.288706	0.258546	0.117549	0.0388292	0.0328187	0.00598874	0.00986019	0.00140509	0.00969717	0.0223102	0.00436263	0.00168726	0.00013629	0.00073107	0.00257271	0.0806917			Liaoning	0	0	0	0	0	0	0	0	0	0	0	0	0	0	0	0			Liaoning	0.548541	0.491238	0.223342	0.0737755	0.0623555	0.0113786	0.0187344	0.00266967	0.0184246	0.0423894	0.00828899
Jilin	0.283521	0.253897	0.114953	0.0378383	0.0321236	0.00569188	0.00984472	0.00141207	0.00942323	0.022542	0.00377049	0.00162494	0.000133381	0.000733784	0.00252096	0.0808364			Jilin	0	0	0	0	0	0	0	0	0	0	0	0	0	0	0	0			Jilin	0.538691	0.482404	0.21841	0.0718928	0.0610348	0.0108146	0.018705	0.00268294	0.0179041	0.0428297	0.00716392
Heilongjiang	0.307754	0.276075	0.127553	0.0426656	0.0358788	0.00677158	0.00999904	0.00139132	0.0102052	0.0219572	0.00633242	0.00182213	0.000147464	0.000750456	0.00270105	0.0804572			Heilongjiang	0.000427066	0.000389888	0.000206984	4.97271e-05	4.45943e-05	5.07757e-06	6.20788e-06	1.69473e-06	1.12008e-05	2.71047e-05	1.15298e-05	1.41657e-06	2.04787e-07	1.97105e-06	3.95977e-06	9.369e-05			Heilongjiang	0.584348	0.524192	0.242165	0.0810198	0.0681296	0.0128614	0.0189926	0.00264199	0.0193797	0.0416944	0.0120212
Shanghai	0.330009	0.296333	0.144804	0.04667	0.0383708	0.00829188	0.00868263	0.00119381	0.0113209	0.0177032	0.0116925	0.00211375	0.000161359	0.00077604	0.00292045	0.070669			Shanghai	0.115241	0.105209	0.0558531	0.0134185	0.0120335	0.00137015	0.00167515	0.000457311	0.00302246	0.007314	0.00311123	0.000382251	5.52604e-05	0.000531874	0.00106852	0.0252816			Shanghai	0.523301	0.468345	0.22486	0.0765964	0.0620744	0.0145214	0.0149894	0.00185665	0.0187896	0.0270536	0.0194156
Jiangsu	0.300037	0.269687	0.13312	0.0409117	0.0341516	0.00674837	0.00779103	0.00113828	0.00973833	0.0171928	0.00984362	0.00176953	0.000145464	0.000809669	0.00262715	0.0663022			Jiangsu	0.167996	0.153371	0.0814216	0.0195612	0.0175421	0.00199737	0.00244201	0.000666659	0.00440609	0.0106622	0.00453548	0.000557238	8.05575e-05	0.000775355	0.00155766	0.036855			Jiangsu	0.418875	0.374371	0.179649	0.0601272	0.0491001	0.0110243	0.0126052	0.00156273	0.0145373	0.0230704	0.014621
Zhejiang	0.37703	0.337816	0.162829	0.0550281	0.0448029	0.0102247	0.0106393	0.00133995	0.013279	0.0196773	0.0138977	0.00257787	0.000185244	0.00075356	0.00329103	0.080206			Zhejiang	0.0887627	0.0799438	0.0394455	0.0123784	0.0102435	0.00213176	0.00214123	0.000319653	0.00300827	0.0047772	0.00309429	0.000539285	4.34498e-05	0.000231216	0.000801172	0.0188322			Zhejiang	0.636471	0.569901	0.273874	0.0934129	0.0759064	0.0175084	0.0182875	0.00225822	0.0225227	0.0330874	0.0236208
Anhui	0.281838	0.253441	0.125767	0.0373437	0.031561	0.00576807	0.00734909	0.00111562	0.00875039	0.0170872	0.00856589	0.00155663	0.000135633	0.000830491	0.00244303	0.0642178			Anhui	0.222981	0.203104	0.106546	0.0268353	0.0236997	0.00311035	0.00360432	0.000870957	0.00613843	0.0137867	0.00631771	0.000844087	0.000107302	0.000952999	0.00205817	0.0486445			Anhui	0.334809	0.298744	0.143065	0.0468013	0.0386362	0.00816002	0.0107194	0.00133582	0.0111012	0.0200577	0.0105893
Fujian	0.381833	0.342327	0.163736	0.0564957	0.0458057	0.0106902	0.0107082	0.00134604	0.013801	0.0197398	0.0140396	0.00266077	0.000188303	0.000725822	0.00338683	0.0810489			Fujian	0.191872	0.171937	0.0824113	0.0283892	0.0229213	0.00546777	0.00530818	0.000664944	0.00704604	0.00964259	0.0072461	0.0013613	9.46299e-05	0.000357276	0.00171439	0.0401965			Fujian	0.552797	0.495678	0.236929	0.0817917	0.0664017	0.0153903	0.0155682	0.00195902	0.0198805	0.0288273	0.0201537
Jiangxi	0.394154	0.352517	0.169928	0.0575891	0.0466273	0.0109626	0.0113206	0.00138414	0.0140926	0.0200457	0.0149911	0.00278211	0.000193357	0.000744686	0.00342813	0.0831864			Jiangxi	0.319418	0.286217	0.137147	0.0472875	0.0381709	0.00911655	0.00884792	0.00110654	0.0117388	0.0160413	0.0120721	0.00226942	0.000157547	0.000592438	0.00285374	0.0669086			Jiangxi	0.461417	0.412187	0.19943	0.0668606	0.054238	0.012624	0.013546	0.00163399	0.0162109	0.0236497	0.0176183
Shandong	0.244523	0.219539	0.107328	0.0298121	0.0260153	0.00377249	0.00717222	0.00115371	0.00703307	0.0183003	0.00460421	0.00116738	0.000114135	0.000838895	0.00209524	0.0647258			Shandong	0.196107	0.179036	0.0950464	0.0228345	0.0204776	0.00233161	0.00285064	0.000778216	0.00514339	0.0124464	0.00529444	0.000650485	9.40378e-05	0.000905101	0.00181832	0.0430222			Shandong	0.288098	0.255993	0.118382	0.036092	0.0309993	0.00506928	0.0110616	0.00149166	0.00873378	0.0235689	0.00398301
Henan	0.232705	0.210051	0.103819	0.0289175	0.025189	0.00370531	0.00591177	0.00103866	0.00681435	0.0165161	0.00491721	0.00106828	0.000110222	0.00082985	0.00207267	0.0584927			Henan	0.238087	0.217361	0.115392	0.0277226	0.0248611	0.00283072	0.00346086	0.000944804	0.0062444	0.0151107	0.00642779	0.00078973	0.000114168	0.00109885	0.00220755	0.0522317			Henan	0.227861	0.203473	0.093403	0.0299929	0.025484	0.00449245	0.00811759	0.00112313	0.00732731	0.0177809	0.00355769
Hubei	0.347572	0.310207	0.151936	0.04733	0.0391795	0.00814228	0.0104826	0.00134869	0.0112882	0.0200154	0.0117387	0.00222515	0.000166761	0.000822424	0.00289165	0.0786751			Hubei	0.156037	0.141225	0.0716035	0.0204676	0.0173904	0.0030664	0.00322569	0.000582539	0.00485788	0.0089397	0.00499793	0.000793093	7.58204e-05	0.000519366	0.00142221	0.0335107			Hubei	0.519953	0.462291	0.224235	0.0715062	0.0587897	0.0127106	0.0170139	0.00203823	0.0170755	0.0299835	0.0178053
Hunan	0.382097	0.341633	0.164045	0.0552207	0.0449032	0.0103153	0.0112357	0.00139386	0.0135162	0.0204152	0.0137348	0.00265082	0.000186533	0.000748723	0.00331469	0.0832045			Hunan	0.215605	0.193222	0.0926643	0.0318666	0.0257402	0.00612616	0.00595058	0.000747734	0.00790625	0.0108495	0.00813075	0.0015256	0.00010632	0.00040444	0.00192681	0.0451791			Hunan	0.53194	0.475202	0.228288	0.0762394	0.06215	0.0140856	0.0159923	0.00197537	0.0185652	0.0290243	0.0187785
Guangdong	0.37411	0.335267	0.159828	0.0549674	0.0445988	0.0103663	0.0106204	0.00134816	0.0135701	0.0198348	0.0132914	0.00260141	0.000183859	0.000720031	0.00333239	0.080942			Guangdong	0.340412	0.305019	0.14613	0.0504137	0.0406884	0.00972528	0.00943699	0.00117898	0.0125164	0.017088	0.0128717	0.00242075	0.000167909	0.000629798	0.00304111	0.0713007			Guangdong	0.404438	0.362489	0.172156	0.0590657	0.0481182	0.0109432	0.0116855	0.00150043	0.0145184	0.022307	0.0136691
Guangxi	0.354572	0.317716	0.150151	0.0512619	0.0419104	0.00934481	0.0104646	0.00136319	0.0126592	0.0204467	0.0112227	0.00238817	0.000172958	0.000723963	0.00315487	0.0809725			Guangxi	0.27625	0.247527	0.118584	0.0409127	0.0330198	0.00789286	0.00765877	0.000956738	0.0101576	0.0138667	0.010446	0.00196462	0.000136261	0.000510982	0.00246789	0.0578611			Guangxi	0.425061	0.380886	0.17856	0.0605763	0.049912	0.0106516	0.0129898	0.00172901	0.0149107	0.0263688	0.0119217
Hainan	0.374085	0.335236	0.159804	0.0549583	0.0445874	0.0103685	0.0106209	0.00134822	0.0135755	0.0198322	0.0132889	0.00260241	0.000183835	0.000719627	0.00333293	0.0809483			Hainan	0.325944	0.292052	0.13991	0.0482756	0.0389612	0.00931441	0.00903785	0.00112879	0.0119859	0.0163597	0.0123262	0.00231843	0.000160775	0.000602616	0.0029118	0.0682687			Hainan	0.417413	0.374102	0.177708	0.0609726	0.0496509	0.0113172	0.0120456	0.0015457	0.0150061	0.0229574	0.0141553
Chongqing	0.324211	0.290838	0.136698	0.0457617	0.037958	0.00779218	0.00981589	0.00134093	0.0111261	0.020644	0.00868278	0.0020348	0.000156881	0.000744063	0.00287278	0.0784997			Chongqing	0.0263895	0.0240922	0.0127901	0.00307276	0.0027556	0.000313756	0.000383601	0.000104722	0.000692127	0.00167487	0.000712453	8.75333e-05	1.26543e-05	0.000121796	0.000244684	0.00578934			Chongqing	0.592251	0.53091	0.248215	0.0841817	0.0696401	0.0145228	0.018305	0.00245352	0.0205167	0.0377162	0.0158561
Sichuan	0.30631	0.275177	0.131063	0.0426123	0.0354881	0.007111	0.00877166	0.00124998	0.01036	0.0192326	0.00841091	0.00185889	0.000148197	0.000760234	0.00273213	0.0729448			Sichuan	0.0810318	0.0739777	0.0392733	0.00943526	0.00846136	0.000963423	0.00117789	0.00032156	0.00212525	0.00514286	0.00218767	0.000268781	3.88565e-05	0.000373989	0.00075133	0.0177768			Sichuan	0.509059	0.456257	0.213674	0.0724717	0.0598122	0.0126438	0.0156061	0.00208557	0.0177712	0.0319133	0.0140118
Guizhou	0.306866	0.275245	0.128703	0.0424654	0.0354575	0.00699249	0.00947932	0.00133058	0.0104234	0.0206846	0.00722416	0.00186756	0.000147355	0.000744912	0.00273058	0.0773224			Guizhou	0.0370762	0.0338486	0.0179695	0.00431711	0.00387151	0.000440815	0.000538944	0.00014713	0.000972413	0.00235312	0.00100097	0.000122981	1.77788e-05	0.000171119	0.000343772	0.0081338			Guizhou	0.549676	0.492502	0.228363	0.0767989	0.0638848	0.012889	0.0175257	0.00239569	0.0189294	0.0371829	0.012825
Yunnan	0.307702	0.276184	0.128902	0.0427414	0.0358409	0.0068861	0.00961291	0.00134634	0.0102478	0.0210987	0.00702977	0.0018333	0.00014796	0.000755007	0.00271161	0.0780656			Yunnan	0.0474812	0.0430626	0.0220786	0.00606238	0.00521269	0.000845737	0.000912505	0.000179907	0.00142302	0.00278979	0.00146421	0.000221464	2.29998e-05	0.000172521	0.000434542	0.0102491			Yunnan	0.541902	0.485993	0.225044	0.0757524	0.0634063	0.0123224	0.0174433	0.00239613	0.01819	0.0375767	0.0120388
Tibet	0.028702	0.0261462	0.0135414	0.00348796	0.00310395	0.000380937	0.000522267	0.000117546	0.000761276	0.0018948	0.000727364	0.000104026	1.38026e-05	0.00012184	0.000259611	0.00654296			Tibet	0.0367906	0.0335878	0.0178311	0.00428386	0.00384168	0.000437419	0.000534793	0.000145997	0.000964922	0.002335	0.000993259	0.000122034	1.76419e-05	0.000169801	0.000341124	0.00807115			Tibet	0.0214223	0.0194488	0.00968065	0.00277165	0.00243999	0.000330103	0.000510994	9.19409e-05	0.000577996	0.00149862	0.000488059
Shannxi	0.249608	0.224522	0.107453	0.0316636	0.0274164	0.00422391	0.00738348	0.00117991	0.00753272	0.0188511	0.00434306	0.00123278	0.000117587	0.000806733	0.00219557	0.0666978			Shannxi	0.156894	0.143236	0.0760413	0.0182686	0.016383	0.00186539	0.00228064	0.000622606	0.00411493	0.00995765	0.00423578	0.000520416	7.52343e-05	0.00072412	0.00145473	0.0344196			Shannxi	0.33305	0.297679	0.135724	0.043719	0.0373466	0.00634659	0.011976	0.00168149	0.0106087	0.0268553	0.00443962
Gansu	0.250738	0.225131	0.106995	0.0313986	0.0273113	0.00406301	0.00786245	0.00122977	0.00744737	0.0197167	0.00380118	0.00123007	0.000117213	0.000810684	0.00217261	0.0692605			Gansu	0.0901632	0.0823142	0.043699	0.0104985	0.00941487	0.00107199	0.00131062	0.000357796	0.00236475	0.00572241	0.00243419	0.00029907	4.32352e-05	0.000416133	0.000835997	0.0197801			Gansu	0.395254	0.353666	0.163962	0.0502087	0.043418	0.00675494	0.0137591	0.00201454	0.0120217	0.0323116	0.00503147
Qinghai	0.0967179	0.0877543	0.0437099	0.012125	0.0107094	0.00140633	0.00227113	0.000427672	0.00265942	0.00694601	0.00199724	0.000390351	4.62712e-05	0.000369324	0.000859233	0.0239499			Qinghai	0	0	0	0	0	0	0	0	0	0	0	0	0	0	0	0			Qinghai	0.183764	0.166733	0.0830489	0.0230376	0.0203479	0.00267203	0.00431514	0.000812578	0.0050529	0.0131974	0.00379475
Ningxia	0.268887	0.241497	0.112667	0.0355063	0.0302248	0.00525949	0.00837133	0.00126654	0.00875232	0.020108	0.00463714	0.00147614	0.000127329	0.000760955	0.00241077	0.0724432			Ningxia	0	0	0	0	0	0	0	0	0	0	0	0	0	0	0	0			Ningxia	0.510885	0.458844	0.214067	0.067462	0.057427	0.00999303	0.0159055	0.00240643	0.0166294	0.0382052	0.00881057
Xinjiang	0.427508	0.369793	0.198526	0.0428913	0.0378471	0.00503125	0.0190948	0.00202165	0.00816332	0.0291528	0.0151348	0.00248243	0.000184546	0.00130564	0.00218974	0.109873			Xinjiang	0.107074	0.0977527	0.051895	0.0124676	0.0111807	0.00127305	0.00155644	0.000424903	0.00280827	0.00679568	0.00289074	0.000355162	5.13442e-05	0.000494181	0.000992793	0.0234899			Xinjiang	0.715898	0.614629	0.330495	0.0702727	0.0618469	0.00841363	0.0348793	0.00345873	0.0129829	0.0492742	0.0261544
	PM2.5	PM1.0	OC	EC	char-EC	soot-EC	SO42-	NO3-	NH4+	K+	WSOA	WSA	PAHs	Phenols	THM	WSI				PM2.5	PM1.0	OC	EC	char-EC	soot-EC	SO42-	NO3-	NH4+	K+	WSOA	WSA	PAHs	Phenols	THM	WSI				PM2.5	PM1.0	OC	EC	char-EC	soot-EC	SO42-	NO3-	NH4+	K+	WSOA
Nationwide	0.271691	0.241424	0.118139	0.0342012	0.0291209	0.0050667	0.00935011	0.00122059	0.00786694	0.0186699	0.00711118	0.00157225	0.000126465	0.000747091	0.00211714	0.0692188			Nationwide	0.086619	0.0785594	0.0402816	0.0110572	0.0095083	0.00154165	0.0016637	0.000328238	0.00259522	0.00509032	0.00267034	0.000403735	4.1957e-05	0.000314928	0.000792751	0.0186979			Nationwide	0.438265	0.388011	0.188215	0.0550319	0.0467732	0.00823937	0.016268	0.00202375	0.0126117	0.030892	0.0111082
[truncated: 5 more columns]
