# Supplementary material for: Multi-pollutants emissions from the burning of majoragricultural residues in China and the relatedhealth-economic effect assessment
Source: Copernicus journal article supplement (doi:10.5194/acp-2016-651), 2016-08-30
Supplement: Supplementary file 1 [file supplementary material.pdf › supplementary material.pdf]

1 *Supplement of*  
2 **Multi-pollutants emissions from the burning of major agricultural**  
3 **residues in China and the related health-economic effect assessment**

4 Chunlin Li<sup>1</sup>, Yunjie Hu<sup>1</sup>, Fei Zhang<sup>1</sup>, Jianmin Chen<sup>1,2</sup>, Zhen Ma<sup>1</sup>, Xingnan Ye<sup>1</sup>, Xin  
5 Yang<sup>1,2</sup>, Lin Wang<sup>1,2</sup>, Xingfu Tang<sup>1</sup>, Renhe Zhang<sup>2</sup>, Mu Mu<sup>2</sup>, Guihua Wang<sup>2</sup>, Haidong  
6 Kan<sup>3</sup>, Xinming Wang<sup>4</sup>, Abdelwahid Mellouki<sup>5</sup>

7 <sup>1</sup>Shanghai Key Laboratory of Atmospheric Particle Pollution and Prevention (LAP<sup>3</sup>),  
8 Department of Environmental Science & Engineering, Fudan University, Handan  
9 Road 220, Shanghai 200433, China

10 <sup>2</sup>Institute of Atmospheric Sciences, Fudan University, Handan Road 220, Shanghai  
11 200433, China

12 <sup>3</sup>Public Health School, Fudan University, Dongan Road 120, Shanghai 200032, China

13 <sup>4</sup>State Key Lab of Organ Geochemistry, Guangzhou Institute of Geochemistry,  
14 Chinese Academy of Sciences, Kexue Road 511, Guangzhou 510640, China

15 <sup>5</sup>Institut de Combustion, Aérothermique, Réactivité et Environnement, CNRS, 45071  
16 Orléans cedex 02, France

17 Correspondence to: J. M. Chen (jmchen@fudan.edu.cn)

18

## Emission factors calculation method

Emission factors of smoke aerosol can be calculated based on filter sampling weight, sampling time, chamber volume, and actual amount of consumed fuel:

$$C_i = \frac{m_i}{v \times \Delta t} \times \varphi \quad (1)$$

$$EF_i = \frac{C_i \times V}{M} \quad (2)$$

Where  $C_i$  is suspend mass concentration of particulate species  $i$  in the aerosol chamber,

$m_i$  is blank corrected filter sampling weight of particulate species  $i$ ,

$v$  is flow rate of integrated sampler ( $100 \text{ L min}^{-1}$ );

$\Delta t$  is sampling time (5min),

$\varphi$  is correction factor with respect to dilution from makeup air during filter samplings,

$EF_i$  is emission factor of particulate species  $i$ ,

$V$  is chamber volume of  $4.5 \text{ m}^3$ ,

$M$  is effective amount of wheat straw burned ( $10.0 \text{ g}$  in this study).

As sampling makeup air and wall loss of smoke particle together dilute aerosol in the chamber, a differential function of particle concentration against time can established as:

$$dC = -C \times \left( \frac{v}{V} + \kappa \right) dt \quad (3)$$

$C_0$  is initial aerosol mass concentration in chamber,

$C$  is dynamic concentration as a result of sampling dilution and wall loss at time  $t$ ,  
 $t$  is the time when filter sampling starts from the initial time,

$\kappa$  is first-order wall loss coefficient of smoke particles in the chamber ( $\kappa \approx 2 \times 10^{-5} \text{ s}^{-1}$  calculated based on the work of Zhang et al (2011))

$\frac{v}{V}$  is first-order dilution coefficient from filter sampling,  $v$  is sampling flow,  $V$  is

chamber volume, and  $\frac{v}{V}$  equals  $3.7 \times 10^{-4} \text{ s}^{-1}$

The calculated dynamic aerosol concentration was described as equation 4:

$$C = C_0 \times e^{-\left(\frac{v}{V} + \kappa\right)t} \quad (4)$$

Effective filter sampling weight of  $\text{PM}_{1.0}$  or  $\text{PM}_{2.5}$  should equal to the integration of dynamic concentration with sampling time and sampling flow as equation 5:

$$m = \frac{C_0}{\frac{v}{V} + \kappa} \times v \times \left[ e^{-\left(\frac{v}{V} + \kappa\right)t} - e^{-\left(\frac{v}{V} + \kappa\right)(t + \Delta t)} \right] = C_0 \times v \times \Delta t \times \varphi \quad (5)$$

$m$  is filter sampling mass weighted by the balance,  $\Delta t$  is sampling duration time (5 min),  $\varphi$  is correction factor for sampling.

Therefore, the emission factor of  $\text{PM}_{1.0}$  and  $\text{PM}_{2.5}$  from specific crop straw burning can be calculated following equation 6:

$$EF = \frac{m \times V}{v \times \Delta t \times \varphi \times m_c} \quad (6)$$

Where  $m_c$  is consumed effective mass of crop straw (unburned residue deducted from  $10.0 \text{ g}$ ).

Combining chemical fractions, emission factor of particulate species can also be derived from emission factor of PM<sub>1.0</sub> and PM<sub>2.5</sub>.

$$\kappa \ll \frac{v}{V}, \quad \varphi \approx \frac{\frac{v}{V} \times \Delta t}{e^{-\frac{v}{V} \times t} - e^{-\frac{v}{V} \times (t + \Delta t)}}$$

The first PM<sub>1.0</sub> filter sampling start at initial time, followed by the second PM<sub>2.5</sub> sampling at 8~10 min from the initial time during one chamber test. According the equation above, the first correction coefficient is 1.06, while the second one is 1.32.

**Table S1.** Parameters in emission inventory calculation.

| Type of agricultural residue | Production to residue ratio (r) <sup>a</sup> | Dry matter fraction (D) <sup>b</sup> | Burn efficiency (f) <sup>c</sup> |
|------------------------------|----------------------------------------------|--------------------------------------|----------------------------------|
| Wheat straw                  | 1.37                                         | 0.865                                | 0.93                             |
| Corn straw                   | 2.00                                         | 0.850                                | 0.93                             |
| Rice straw                   | 0.62                                         | 0.940                                | 0.93                             |
| Cotton residue               | 3.00                                         | 0.850                                | 0.93                             |
| Soybean residue              | 1.50                                         | 0.897                                | 0.68 <sup>d</sup>                |

a. Data from Chinese Association of Rural Energy Industry (CAREI,2000, data available at <http://www.carei.org.cn/index.php>);

b. Data from He et al., 2011; IPCC, 2007)

c. Zhang et al., 2011; Wang et al., 2008; Zhang et al., 2008; and also confirmed by this study

d. Koopmans et al., 1997

69 **Table S2.**Temporal-spatial distribution of crop production in form of production ratio  
70 in China.

| Province       | Summer harvest     |                   |                   |                     |                      | Autumn harvest     |                   |                   |                     |                      |
|----------------|--------------------|-------------------|-------------------|---------------------|----------------------|--------------------|-------------------|-------------------|---------------------|----------------------|
|                | Wheat <sup>a</sup> | Corn <sup>b</sup> | Rice <sup>c</sup> | Cotton <sup>d</sup> | Soybean <sup>e</sup> | Wheat <sup>a</sup> | Corn <sup>b</sup> | Rice <sup>c</sup> | Cotton <sup>d</sup> | Soybean <sup>e</sup> |
| Beijing        | 1.00               | 0.00              | 0.00              | 0.00                | 0.00                 | 0.00               | 1.00              | 1.00              | 1.00                | 1.00                 |
| Tianjin        | 0.94               | 0.00              | 0.00              | 0.00                | 0.00                 | 0.06               | 1.00              | 1.00              | 1.00                | 1.00                 |
| Hebei          | 1.00               | 0.00              | 0.00              | 0.00                | 0.00                 | 0.00               | 1.00              | 1.00              | 1.00                | 1.00                 |
| Shanxi         | 1.00               | 0.00              | 0.00              | 0.00                | 0.00                 | 0.00               | 1.00              | 1.00              | 1.00                | 1.00                 |
| Inner Mongolia | 0.05               | 0.00              | 0.03              | 0.00                | 0.00                 | 0.95               | 1.00              | 0.97              | 1.00                | 1.00                 |
| Liaoning       | 0.05               | 0.00              | 0.00              | 0.00                | 0.00                 | 0.95               | 1.00              | 1.00              | 1.00                | 1.00                 |
| Jilin          | 0.00               | 0.00              | 0.00              | 0.00                | 0.00                 | 1.00               | 1.00              | 1.00              | 1.00                | 1.00                 |
| Heilongjiang   | 0.05               | 0.00              | 0.00              | None                | 0.00                 | 0.95               | 1.00              | 1.00              | None                | 1.00                 |
| Shanghai       | 1.00               | 0.00              | 0.00              | 0.00                | 0.00                 | 0.00               | 1.00              | 1.00              | 1.00                | 1.00                 |
| Jiangsu        | 1.00               | 0.00              | 0.00              | 0.00                | 0.00                 | 0.00               | 1.00              | 1.00              | 1.00                | 1.00                 |
| Zhejiang       | 1.00               | 0.00              | 0.09              | 0.00                | 0.00                 | 0.00               | 1.00              | 0.91              | 1.00                | 1.00                 |
| Anhui          | 1.00               | 0.00              | 0.10              | 0.00                | 0.00                 | 0.00               | 1.00              | 0.90              | 1.00                | 1.00                 |
| Fujian         | 1.00               | 0.00              | 0.25              | None                | 0.00                 | 0.00               | 1.00              | 0.75              | None                | 1.00                 |
| Jiangxi        | 0.95               | 0.00              | 0.40              | 0.00                | 0.00                 | 0.05               | 1.00              | 0.60              | 1.00                | 1.00                 |
| Shandong       | 1.00               | 0.00              | 0.00              | 0.00                | 0.00                 | 0.00               | 1.00              | 1.00              | 1.00                | 1.00                 |
| Henan          | 1.00               | 0.00              | 0.00              | 0.00                | 0.00                 | 0.00               | 1.00              | 1.00              | 1.00                | 1.00                 |
| Hubei          | 1.00               | 0.00              | 0.15              | 0.00                | 0.00                 | 0.00               | 1.00              | 0.85              | 1.00                | 1.00                 |
| Hunan          | 1.00               | 0.00              | 0.30              | 0.00                | 0.00                 | 0.00               | 1.00              | 0.70              | 1.00                | 1.00                 |
| Guangdong      | 1.00               | 0.00              | 0.47              | None                | 0.00                 | 0.00               | 1.00              | 0.53              | None                | 1.00                 |
| Guangxi        | 1.00               | 0.00              | 0.47              | 0.00                | 0.00                 | 0.00               | 1.00              | 0.53              | 1.00                | 1.00                 |
| Hainan         | 0.00               | 0.00              | 0.45              | None                | 0.00                 | 1.00               | 1.00              | 0.55              | None                | 1.00                 |
| Chongqing      | 1.00               | 0.00              | 0.00              | None                | 0.00                 | 0.00               | 1.00              | 1.00              | None                | 1.00                 |
| Sichuan        | 0.99               | 0.00              | 0.00              | 0.00                | 0.00                 | 0.01               | 1.00              | 1.00              | 1.00                | 1.00                 |
| Guizhou        | 1.00               | 0.00              | 0.00              | 0.00                | 0.00                 | 0.00               | 1.00              | 1.00              | 1.00                | 1.00                 |
| Yunnan         | 0.95               | 0.00              | 0.06              | None                | 0.00                 | 0.05               | 1.00              | 0.94              | None                | 1.00                 |
| Tibet          | 0.75               | 0.00              | 0.00              | None                | 0.00                 | 0.25               | 1.00              | 1.00              | None                | 1.00                 |
| Shannxi        | 1.00               | 0.00              | 0.00              | 0.00                | 0.00                 | 0.00               | 1.00              | 1.00              | 1.00                | 1.00                 |
| Gansu          | 0.65               | 0.00              | None              | 0.00                | 0.00                 | 0.35               | 1.00              | None              | 1.00                | 1.00                 |
| Qinghai        | 0.00               | 0.00              | None              | None                | 0.00                 | 1.00               | 1.00              | None              | None                | 1.00                 |
| Ningxia        | 0.00               | 0.00              | 0.00              | None                | 0.00                 | 1.00               | 1.00              | 1.00              | None                | 1.00                 |
| Xinjiang       | 0.66               | 0.00              | 0.00              | 0.00                | 0.00                 | 0.34               | 1.00              | 1.00              | 1.00                | 1.00                 |

71 *None means no such crop grows in the province from agricultural documents*

72 *a. Data of winter wheat (sowing time: winter)and spring wheat(sowing time: spring) production*  
73 *from China Grain Yearbook 2013(National Bureau of Statistics of China, NBSC, 2013)*

74 *b. Data of spring corn(harvest time: autumn) and summer corn (harvest time: late autumn)*  
75 *production from China Grain Yearbook 2013 (NBSC, 2013)*

76 *c. Data of early, middle, and late rice production from China Grain Yearbook of 2013, Journal*  
77 *of China Rice 2011, and Chinese Journal of Rice Science (NBSC, 2013)*

78 *d. Data of cotton harvest and production area from China Yearbook(2012~2014) and from*  
79 *website of <http://www.cncotton.com/> (NBSC, 2013)*

80 e. *Data of soybean harvest and production from China Yearbook(2012~2014) and China Grain*  
81 *Yearbook 2013 (NBSC, 2013)*  
82

83 **Table S3.** Summary of carcinogenic UnitRisk for selected HAPs.

| <i>Elements</i>        | Carcinogenic risk factor (unit: per $\mu\text{g m}^{-3}$ ) |
|------------------------|------------------------------------------------------------|
| As                     | 4.30E-03 <sup>a</sup>                                      |
| Zn                     | —                                                          |
| Pb                     | 1.20E-05 <sup>a</sup>                                      |
| Cd                     | 1.80E-03 <sup>a</sup>                                      |
| Ni                     | 4.80E-04 <sup>a</sup>                                      |
| Cr                     | 2.40E-03 <sup>a</sup>                                      |
| V                      | —                                                          |
| Al                     | —                                                          |
| <i>PAHs</i>            | Carcinogenic risk factor (unit: per $\mu\text{g m}^{-3}$ ) |
| naphthalene            | 3.40E-05 <sup>b</sup>                                      |
| acenaphthylene         | 1.10E-06 <sup>c</sup>                                      |
| acenaphthene           | 1.10E-06 <sup>c</sup>                                      |
| flourene               | 1.10E-06 <sup>c</sup>                                      |
| anthracene             | 1.10E-05 <sup>c</sup>                                      |
| phenathrene            | 1.10E-06 <sup>c</sup>                                      |
| flouranthene           | 1.10E-06 <sup>c</sup>                                      |
| pyrene                 | 1.10E-06 <sup>c</sup>                                      |
| benz(a)anthracene      | 1.10E-04 <sup>b</sup>                                      |
| chrysene               | 1.10E-05 <sup>b</sup>                                      |
| benzo(a)pyrene         | 1.10E-03 <sup>b</sup>                                      |
| benzo(b)flouranthene   | 1.10E-04 <sup>b</sup>                                      |
| benzo(k)flouranthene   | 1.10E-04 <sup>b</sup>                                      |
| benzo(g,h,i)pyrene     | 1.10E-05 <sup>c</sup>                                      |
| indeno(1,2,3-cd)pyrene | 1.10E-04 <sup>b</sup>                                      |
| dibenz(a,h)anthracene  | 1.20E-03 <sup>b</sup>                                      |

84 <sup>a</sup> Reference from the Integrated Risk Information System (IRIS), data available at website:  
85 <http://www.epa.gov/iris/index.html>

86 <sup>b</sup> Reference from Cal EPA, data available at  
87 website:[http://www.oehha.ca.gov/air/hot\\_spots/pdf/May2005Hotspots.pdf](http://www.oehha.ca.gov/air/hot_spots/pdf/May2005Hotspots.pdf)

88 <sup>c</sup> Reference from Nisbet et al., 1992

89

90 **Table S4.** Exposure-response coefficients for individual mortality (per 10  $\mu\text{g m}^{-3}$  95%  
91 CI).

| Province<br>(Research Region) | $\beta$ (95% CI)   | References <sup>a</sup>                                |
|-------------------------------|--------------------|--------------------------------------------------------|
| <b>Beijing</b>                | 0.53 (0.37, 0.69)  | Chen et al., 2011, Xu et al., 2014, Gao et al., 2015   |
| <b>Tianjin</b>                | 0.77 (0.44, 1.10)  | Chen et al., 2012                                      |
| <b>Hebei (Tangshan)</b>       | 0.09 (-0.40, 0.58) | Chen et al., 2012                                      |
| <b>Shanxi (Taiyuan)</b>       | 0.19 (0.03, 0.35)  | Zhang et al., 2007, Chen et al., 2012                  |
| <b>Inner Mongolia</b>         | 0.19 (0.03, 0.35)  | Hou et al., 2012                                       |
| <b>Liaoning (Shenyang)</b>    | 0.49 (0.19, 0.79)  | Chen et al., 2011, Ma et al., 2011                     |
| <b>Jilin</b>                  | 0.49 (0.19, 0.79)  | Hou et al., 2012                                       |
| <b>Heilongjiang</b>           | 0.49 (0.19, 0.79)  | Hou et al., 2012                                       |
| <b>Shanghai</b>               | 0.28 (0.10, 0.46)  | Chen et al., 2011, Kan et al., 2007, Wong et al., 2008 |
| <b>Jiangsu (Suzhou)</b>       | 0.36 (0.19, 0.53)  | Chen et al., 2012                                      |
| <b>Zhejiang (Hangzhou)</b>    | 0.31 (0.07, 0.55)  | Chen et al., 2012                                      |
| <b>Anhui</b>                  | 0.36 (0.19, 0.53)  | Hou et al., 2012                                       |
| <b>Fujian (Fuzhou)</b>        | 0.61 (0.19, 1.03)  | Hou et al., 2012, Chen et al., 2012                    |
| <b>Jiangxi</b>                | 0.36 (0.19, 0.53)  | Hou et al., 2012                                       |
| <b>Shandong</b>               | 0.28 (0.10, 0.46)  | Hou et al., 2012                                       |
| <b>Henan</b>                  | 0.36 (0.19, 0.53)  | Hou et al., 2012                                       |
| <b>Hubei (Wuhan)</b>          | 0.36 (0.19, 0.53)  | Hou et al., 2012, Chen et al., 2012, Wong et al., 2008 |
| <b>Hunan</b>                  | 0.36 (0.19, 0.53)  | Hou et al., 2012                                       |
| <b>Guangdong (Guangzhou)</b>  | 0.90 (0.55, 1.26)  | Hou et al., 2012, Yang et al., 2012                    |
| <b>Guangxi</b>                | 0.36 (0.19, 0.53)  | Hou et al., 2012                                       |
| <b>Hainan</b>                 | 0.36 (0.19, 0.53)  | Hou et al., 2012                                       |
| <b>Chongqing</b>              | 0.36 (0.19, 0.53)  | Hou et al., 2012                                       |
| <b>Sichuan</b>                | 0.36 (0.19, 0.53)  | Hou et al., 2012                                       |
| <b>Guizhou</b>                | 0.36 (0.19, 0.53)  | Hou et al., 2012                                       |
| <b>Yunnan</b>                 | 0.36 (0.19, 0.53)  | Hou et al., 2012                                       |
| <b>Tibet</b>                  | 0.19 (0.03, 0.35)  | Hou et al., 2012                                       |
| <b>Shannxi (Xi'an)</b>        | 0.20 (0.10, 0.30)  | Cao et al., 2012                                       |
| <b>Gansu (Lanzhou)</b>        | 0.05 (-0.10, 0.20) | Chen et al., 2012                                      |
| <b>Qinghai</b>                | 0.19 (0.03, 0.35)  | Hou et al., 2012                                       |
| <b>Ningxia</b>                | 0.19 (0.03, 0.35)  | Hou et al., 2012                                       |
| <b>Xinjiang (Urumqi)</b>      | 0.10 (-0.10, 0.30) | Chen et al., 2012                                      |

92 <sup>a</sup> Cao et al., 2012; Chen et al., 2011; Chen et al., 2012; Gao et al., 2015; Hou et al., 2012; Kan et al.,  
93 2007; Ma et al., 2011; Wong et al., 2008; Xu et al., 2014; Yang et al., 2012; Zhang et al., 2007

94



95 **Table S5.** Regional human capital value.

| Region         | Population (10 <sup>4</sup> ) <sup>a</sup> | GDP ( billion RMB ) <sup>a</sup> | HC ( US\$ ) |
|----------------|--------------------------------------------|----------------------------------|-------------|
| Beijing        | 2069                                       | 1780.1                           | 342252.3    |
| Tianjin        | 1413                                       | 1288.52                          | 362753.4    |
| Hebei          | 7288                                       | 2657.5                           | 145053.2    |
| Shanxi         | 3611                                       | 1211.28                          | 133438.0    |
| Inner Mongolia | 2490                                       | 1598.83                          | 255426.2    |
| Liaoning       | 4389                                       | 2480.13                          | 224787.1    |
| Jilin          | 2750                                       | 1193.78                          | 172684.8    |
| Heilongjiang   | 3834                                       | 1369.16                          | 142057.6    |
| Shanghai       | 2380                                       | 2010.13                          | 335977.1    |
| Jiangsu        | 7920                                       | 5405.82                          | 271518.2    |
| Zhejiang       | 5477                                       | 3460.63                          | 251347.7    |
| Anhui          | 5988                                       | 1721.21                          | 114344.3    |
| Fujian         | 3748                                       | 1970.18                          | 209107.1    |
| Jiangxi        | 4504                                       | 1294.85                          | 114362.5    |
| Shandong       | 9685                                       | 5001.32                          | 205422.3    |
| Henan          | 9406                                       | 2981.01                          | 126072.7    |
| Hubei          | 5779                                       | 2225.02                          | 153159.4    |
| Hunan          | 6639                                       | 2215.42                          | 132744.3    |
| Guangdong      | 10594                                      | 5706.79                          | 214286.3    |
| Guangxi        | 4682                                       | 1303.1                           | 110715.6    |
| Hainan         | 887                                        | 285.53                           | 128053.3    |
| Chongqing      | 2945                                       | 1145.9                           | 154783.2    |
| Sichuan        | 8076                                       | 2384.98                          | 117476.5    |
| Guizhou        | 3484                                       | 680.22                           | 77666.5     |
| Yunnan         | 4659                                       | 1030.98                          | 88027.8     |
| Tibet          | 308                                        | 69.56                            | 89840.3     |
| Shannxi        | 3763                                       | 1445.12                          | 152767.9    |
| Gansu          | 2578                                       | 565.02                           | 87185.3     |
| Qinghai        | 573                                        | 188.45                           | 130829.0    |
| Ningxia        | 647                                        | 232.66                           | 143047.4    |
| Xinjiang       | 2233                                       | 746.63                           | 133008.4    |

96 <sup>a</sup> NBSC, 2013, data available at <http://www.stats.gov.cn/tjsj/ndsj/>, in Chinese

97

98 **Table S6.** Relevance matrix of multi-pollutants in PM<sub>2.5</sub> and PM<sub>1.0</sub> from agricultural residue burning.

|                   |                   | PM <sub>2.5</sub> | PM <sub>1.0</sub> | PM <sub>2.5</sub> |       |              |         | PM <sub>1.0</sub> |              |              |              | PAHs              |                   | Phenols           |                   | Organic acids     |                   | Aminium           |                   |
|-------------------|-------------------|-------------------|-------------------|-------------------|-------|--------------|---------|-------------------|--------------|--------------|--------------|-------------------|-------------------|-------------------|-------------------|-------------------|-------------------|-------------------|-------------------|
|                   |                   |                   |                   | OC                | EC    | char-EC      | soot-EC | OC                | EC           | char-EC      | soot-EC      | PM <sub>2.5</sub> | PM <sub>1.0</sub> |
| PM <sub>2.5</sub> |                   | 1.000             | <b>0.995</b>      | <b>0.993</b>      | 0.675 | 0.730        | 0.472   | <b>0.994</b>      | 0.603        | 0.661        | 0.380        | <b>0.951</b>      | <b>0.923</b>      | 0.687             | 0.611             | <b>0.877</b>      | <b>0.846</b>      | 0.760             | 0.760             |
| PM <sub>1.0</sub> |                   |                   | 1.000             | <b>0.982</b>      | 0.736 | 0.787        | 0.540   | <b>0.993</b>      | 0.669        | 0.723        | 0.446        | <b>0.973</b>      | <b>0.950</b>      | 0.644             | 0.600             | <b>0.844</b>      | <b>0.805</b>      | 0.760             | 0.752             |
| PM <sub>2.5</sub> | OC                |                   |                   | 1.000             | 0.633 | 0.692        | 0.420   | <b>0.996</b>      | 0.560        | 0.625        | 0.326        | <b>0.927</b>      | <b>0.900</b>      | 0.729             | 0.635             | <b>0.921</b>      | <b>0.890</b>      | 0.738             | 0.739             |
|                   | EC                |                   |                   |                   | 1.000 | <b>0.996</b> | 0.714   | 0.695             | <b>0.994</b> | <b>0.997</b> | 0.790        | <b>0.842</b>      | <b>0.885</b>      | 0.179             | 0.251             | 0.431             | 0.385             | 0.489             | 0.433             |
|                   | char-EC           |                   |                   |                   |       | 1.000        | 0.638   | 0.750             | <b>0.979</b> | <b>0.993</b> | 0.790        | <b>0.898</b>      | <b>0.923</b>      | 0.222             | 0.284             | 0.510             | 0.451             | 0.539             | 0.485             |
|                   | soot-EC           |                   |                   |                   |       |              | 1.000   | 0.488             | <b>0.978</b> | <b>0.949</b> | <b>0.885</b> | 0.681             | 0.714             | 0.144             | 0.147             | 0.234             | 0.186             | 0.294             | 0.238             |
| PM <sub>1.0</sub> | OC                |                   |                   |                   |       |              |         | 1.000             | 0.625        | 0.687        | 0.388        | <b>0.955</b>      | <b>0.933</b>      | 0.687             | 0.623             | <b>0.894</b>      | <b>0.858</b>      | 0.745             | 0.739             |
|                   | EC                |                   |                   |                   |       |              |         |                   | 1.000        | <b>0.994</b> | <b>0.869</b> | <b>0.800</b>      | <b>0.831</b>      | 0.135             | 0.218             | 0.370             | 0.313             | 0.418             | 0.360             |
|                   | char-EC           |                   |                   |                   |       |              |         |                   |              | 1.000        | 0.782        | <b>0.846</b>      | <b>0.876</b>      | 0.243             | 0.255             | 0.443             | 0.384             | 0.468             | 0.411             |
|                   | soot-EC           |                   |                   |                   |       |              |         |                   |              |              | 1.000        | 0.585             | 0.616             | 0.027             | 0.100             | 0.147             | 0.109             | 0.207             | 0.155             |
| PAHs              | PM <sub>2.5</sub> |                   |                   |                   |       |              |         |                   |              |              |              | 1.000             | <b>0.896</b>      | 0.488             | 0.473             | 0.776             | 0.728             | 0.736             | 0.710             |
|                   | PM <sub>1.0</sub> |                   |                   |                   |       |              |         |                   |              |              |              |                   | 1.000             | 0.387             | 0.419             | 0.760             | 0.710             | 0.713             | 0.680             |
| Phenols           | PM <sub>2.5</sub> |                   |                   |                   |       |              |         |                   |              |              |              |                   |                   | 1.000             | <b>0.890</b>      | 0.712             | 0.712             | 0.373             | 0.414             |
|                   | PM <sub>1.0</sub> |                   |                   |                   |       |              |         |                   |              |              |              |                   |                   |                   | 1.000             | 0.511             | 0.485             | 0.302             | 0.328             |
| Organic acids     | PM <sub>2.5</sub> |                   |                   |                   |       |              |         |                   |              |              |              |                   |                   |                   |                   | 1.000             | <b>0.895</b>      | 0.762             | 0.608             |
|                   | PM <sub>1.0</sub> |                   |                   |                   |       |              |         |                   |              |              |              |                   |                   |                   |                   |                   | 1.000             | 0.569             | 0.741             |
| Aminium           | PM <sub>2.5</sub> |                   |                   |                   |       |              |         |                   |              |              |              |                   |                   |                   |                   |                   |                   | 1.000             | <b>0.936</b>      |
|                   | PM <sub>1.0</sub> |                   |                   |                   |       |              |         |                   |              |              |              |                   |                   |                   |                   |                   |                   |                   | 1.000             |

**Table S7.** Summary of field burning rates in China.

| Province       | Burning rate from literature |                     | Estimated burning rate |             | NDRC report <sup>d</sup> | Carcinogenic Risk |
|----------------|------------------------------|---------------------|------------------------|-------------|--------------------------|-------------------|
|                | BAU-I <sup>a</sup>           | BAU-II <sup>b</sup> | EM-I                   | EM-II       | NDRC                     | CRC               |
| Beijing        | 0.00                         | 0.17                | 0.00                   | 0.19        | 0.13                     | 0.02              |
| Tianjin        | 0.00                         | 0.17                | 0.00                   | 0.20        | 0.30                     | 0.01              |
| Hebei          | 0.20                         | 0.17                | 0.22                   | 0.16        | 0.19                     | 0.01              |
| Shanxi         | 0.20                         | 0.17                | 0.16                   | 0.14        | 0.22                     | 0.02              |
| Inner Mongolia | 0.00                         | 0.12                | 0.00                   | 0.09        | 0.27                     | 0.10              |
| Liaoning       | 0.20                         | 0.12                | 0.16                   | 0.09        | 0.34                     | 0.01              |
| Jilin          | 0.30                         | 0.12                | 0.28                   | 0.11        | 0.25                     | 0.01              |
| Heilongjiang   | 0.30                         | 0.12                | 0.50                   | 0.17        | 0.25                     | 0.02              |
| Shanghai       | 0.00                         | 0.32                | 0.00                   | 0.29        | 0.12                     | 0.01              |
| Jiangsu        | 0.30                         | 0.32                | 0.32                   | 0.23        | 0.19                     | 0.01              |
| Zhejiang       | 0.30                         | 0.32                | 0.64                   | 0.28        | 0.22                     | 0.04              |
| Anhui          | 0.20                         | 0.32                | 0.21                   | 0.29        | 0.43                     | 0.01              |
| Fujian         | 0.30                         | 0.32                | 0.39                   | 0.22        | 0.17                     | 0.06              |
| Jiangxi        | 0.20                         | 0.11                | 0.20                   | 0.08        | 0.25                     | 0.02              |
| Shandong       | 0.30                         | 0.17                | 0.40                   | 0.17        | 0.21                     | 0.01              |
| Henan          | 0.20                         | 0.17                | 0.23                   | 0.18        | 0.22                     | 0.01              |
| Hubei          | 0.20                         | 0.11                | 0.21                   | 0.08        | 0.30                     | 0.02              |
| Hunan          | 0.20                         | 0.33                | 0.22                   | 0.24        | 0.35                     | 0.02              |
| Guangdong      | 0.30                         | 0.33                | 0.44                   | 0.25        | 0.18                     | 0.04              |
| Guangxi        | 0.20                         | 0.33                | 0.25                   | 0.25        | 0.35                     | 0.04              |
| Hainan         | 0.30                         | 0.33                | 0.51                   | 0.25        | 0.56                     | 0.06              |
| Chongqing      | 0.20                         | 0.11                | 0.24                   | 0.08        | 0.45                     | 0.02              |
| Sichuan        | 0.20                         | 0.11                | 0.26                   | 0.09        | 0.30                     | 0.04              |
| Guizhou        | 0.20                         | 0.11                | 0.31                   | 0.10        | 0.43                     | 0.05              |
| Yunnan         | 0.20                         | 0.11                | 0.24                   | 0.09        | 0.28                     | 0.05              |
| Tibet          | 0.00                         | 0.16                | 0.00                   | 0.30        | 0.16                     | 1.00              |
| Shannxi        | 0.20                         | 0.17                | 0.25                   | 0.18        | 0.28                     | 0.03              |
| Gansu          | 0.10                         | 0.16                | 0.09                   | 0.11        | 0.33                     | 0.09              |
| Qinghai        | 0.00                         | 0.16                | 0.00                   | 0.20        | 0.28                     | 1.00              |
| Ningxia        | 0.10                         | 0.16                | 0.09                   | 0.13        | 0.16                     | 0.03              |
| Xinjiang       | 0.10                         | 0.16                | 0.06                   | 0.13        | 0.30                     | 0.19              |
| Nationwide     | <b>0.21</b>                  | <b>0.16</b>         | <b>0.26</b>            | <b>0.15</b> | <b>0.27</b>              | <b>0.03</b>       |

- 100 a. Zhao et al., 2012; Cao et al., 2006; Cao et al., 2011
- b. Wang et al., 2008
- c. Calculated based on data from China Yearbook 2001~2013 (NBSC, 2001-2013), China Rural Statistic Yearbook 2001~2013, data available at <http://www.grain.gov.cn/Grain/>
- 105 d. Data from the National Development and Reform Commission report ((2014)No.516) : <http://www.sdpc.gov.cn/>

**Table S8.** Regional health impact estimated from agricultural straw field burning PM<sub>2.5</sub> exposure in 2012 (95%CI).

| Region         | Mortality         | Respiratory hospital admission | Cardiovascular hospital admission | Chronic bronchitis         |
|----------------|-------------------|--------------------------------|-----------------------------------|----------------------------|
| Beijing        | 15 (9 , 19)       | 64 (59 , 116)                  | 107 (46 , 167)                    | 29710 (10368 , 47471)      |
| Tianjin        | 120 (59 , 171)    | 172 (154 , 300)                | 215 (93 , 333)                    | 57476 (21782 , 85289)      |
| Hebei          | 119 (0 , 763)     | 1405 (1204 , 2360)             | 1677 (726 , 2608)                 | 466659 (171730 , 709481)   |
| Shanxi         | 47 (6 , 87)       | 282 (260 , 513)                | 361 (156 , 564)                   | 106087 (37488 , 167523)    |
| Inner Mongolia | 5 (1 , 9)         | 23 (23 , 45)                   | 31 (13 , 49)                      | 9656 (3294 , 15773)        |
| Liaoning       | 283 (94 , 455)    | 568 (568 , 1097)               | 793 (346 , 1224)                  | 202625 (79397 , 292290)    |
| Jilin          | 232 (77 , 371)    | 512 (512 , 976)                | 715 (314 , 1097)                  | 169765 (70257 , 233621)    |
| Heilongjiang   | 297 (99 , 477)    | 610 (610 , 1168)               | 852 (373 , 1309)                  | 207490 (84192 , 291072)    |
| Shanghai       | 15 (5 , 25)       | 318 (291 , 562)                | 406 (177 , 627)                   | 103495 (40632 , 149294)    |
| Jiangsu        | 1338 (604 , 1968) | 3597 (3152 , 5970)             | 4408 (1943 , 6739)                | 1010935 (428630 , 1370199) |
| Zhejiang       | 177 (34 , 316)    | 665 (626 , 1224)               | 873 (378 , 1355)                  | 239418 (88994 , 361723)    |
| Anhui          | 654 (294 , 965)   | 2187 (1833 , 3528)             | 2559 (1118 , 3944)                | 640984 (254957 , 911232)   |
| Fujian         | 123 (33 , 210)    | 257 (228 , 452)                | 317 (137 , 496)                   | 94774 (33064 , 151497)     |
| Jiangxi        | 169 (76 , 251)    | 561 (466 , 920)                | 649 (280 , 1013)                  | 188513 (67183 , 295274)    |
| Shandong       | 1034 (316 , 1700) | 4079 (3418 , 6530)             | 4775 (2095 , 7332)                | 1148305 (470450 , 1596069) |
| Henan          | 1088 (489 , 1607) | 3622 (2917 , 5633)             | 4070 (1776 , 6283)                | 1036093 (407513 , 1482407) |
| Hubei          | 248 (111 , 368)   | 761 (682 , 1337)               | 950 (411 , 1478)                  | 265622 (97362 , 406040)    |
| Hunan          | 492 (221 , 728)   | 1370 (1198 , 2338)             | 1670 (725 , 2591)                 | 453314 (169872 , 678779)   |
| Guangdong      | 704 (366 , 991)   | 1319 (1077 , 2127)             | 1497 (646 , 2339)                 | 438230 (155315 , 689872)   |
| Guangxi        | 144 (64 , 214)    | 468 (392 , 775)                | 545 (235 , 852)                   | 161580 (56682 , 256861)    |
| Hainan         | 29 (13 , 43)      | 101 (83 , 164)                 | 116 (50 , 181)                    | 34011 (12014 , 53715)      |
| Chongqing      | 127 (57 , 188)    | 318 (311 , 604)                | 433 (188 , 671)                   | 114855 (43778 , 169916)    |
| Sichuan        | 180 (81 , 268)    | 461 (431 , 853)                | 600 (258 , 937)                   | 177341 (62349 , 281457)    |
| Guizhou        | 70 (31 , 104)     | 170 (164 , 325)                | 229 (99 , 357)                    | 67131 (23740 , 105970)     |
| Yunnan         | 68 (30 , 101)     | 177 (171 , 338)                | 237 (102 , 371)                   | 71278 (24758 , 114413)     |
| Tibet          | 0 (0 , 0)         | 0 (0 , 0)                      | 0 (0 , 0)                         | 18 (6 , 29)                |
| Shannxi        | 45 (19 , 69)      | 256 (221 , 439)                | 307 (132 , 481)                   | 92553 (32094 , 148790)     |
| Gansu          | 2 (0 , 9)         | 44 (40 , 80)                   | 56 (24 , 88)                      | 17339 (5888 , 28453)       |
| Qinghai        | 0 (0 , 0)         | 0 (0 , 0)                      | 0 (0 , 1)                         | 107 (36 , 178)             |
| Ningxia        | 4 (1 , 7)         | 26 (26 , 51)                   | 36 (16 , 56)                      | 10744 (3756 , 17133)       |
| Xinjiang       | 2 (0 , 7)         | 28 (27 , 53)                   | 37 (16 , 58)                      | 11528 (3905 , 18962)       |

**110 Table S9.** Regional health-related economic losses estimated from agricultural straw field burning PM<sub>2.5</sub> exposure in 2012 (95%CI).

| Region         | Mortality (million<br>US\$) | Respiratory hospital<br>admission (US\$) | Cardiovascular hospital<br>admission (US\$) | Chronic bronchitis (million<br>US\$) | Total (million US\$)    | GDP ratio (%)      |
|----------------|-----------------------------|------------------------------------------|---------------------------------------------|--------------------------------------|-------------------------|--------------------|
| Beijing        | 5.0 (2.9 , 6.6)             | 40721 (37149 , 73633)                    | 130813 (56316 , 204641)                     | 28.2 (9.8 , 45.0)                    | 33.3 (12.9 , 51.9)      | 0.01 (0.00 , 0.02) |
| Tianjin        | 43.5 (21.3 , 62.1)          | 108882 (97509 , 189735)                  | 262986 (114290 , 407592)                    | 54.5 (20.7 , 80.9)                   | 98.4 (42.1 , 143.6)     | 0.05 (0.02 , 0.07) |
| Hebei          | 17.2 (0.0 , 110.6)          | 888441 (761317 , 1491698)                | 2051480 (888352 , 3190721)                  | 442.7 (162.9 , 673.0)                | 462.8 (164.6 , 788.3)   | 0.12 (0.04 , 0.20) |
| Shanxi         | 6.2 (0.8 , 11.6)            | 178215 (164136 , 324460)                 | 441797 (190457 , 690200)                    | 100.6 (35.6 , 158.9)                 | 107.5 (36.7 , 171.5)    | 0.06 (0.02 , 0.09) |
| Inner Mongolia | 1.2 (0.2 , 2.2)             | 14280 (14270 , 28422)                    | 38373 (16479 , 60175)                       | 9.2 (3.1 , 15.0)                     | 10.4 (3.3 , 17.2)       | 0.00 (0.00 , 0.01) |
| Liaoning       | 63.6 (21.1 , 102.2)         | 359343 (359343 , 693770)                 | 970126 (423305 , 1497619)                   | 192.2 (75.3 , 277.3)                 | 257.1 (97.2 , 381.7)    | 0.07 (0.03 , 0.10) |
| Jilin          | 40.0 (13.4 , 64.1)          | 323592 (323592 , 617007)                 | 874992 (384236 , 1342282)                   | 161.0 (66.6 , 221.6)                 | 202.3 (80.7 , 287.7)    | 0.11 (0.05 , 0.16) |
| Heilongjiang   | 42.2 (14.1 , 67.7)          | 385730 (385583 , 738158)                 | 1042099 (456717 , 1601816)                  | 196.8 (79.9 , 276.1)                 | 240.5 (94.8 , 346.1)    | 0.12 (0.05 , 0.17) |
| Shanghai       | 5.0 (1.5 , 8.3)             | 200883 (184058 , 355126)                 | 496947 (216914 , 766900)                    | 98.2 (38.5 , 141.6)                  | 103.9 (40.5 , 151.0)    | 0.03 (0.01 , 0.05) |
| Jiangsu        | 363.3 (164.0 , 534.4)       | 2274302 (1992690 , 3774133)              | 5392964 (2376775 , 8244488)                 | 959.0 (406.6 , 1299.8)               | 1330.0 (575.0 , 1846.2) | 0.16 (0.07 , 0.23) |
| Zhejiang       | 44.6 (8.6 , 79.4)           | 420606 (396020 , 773845)                 | 1067513 (462934 , 1658015)                  | 227.1 (84.4 , 343.1)                 | 273.2 (93.8 , 425.0)    | 0.05 (0.02 , 0.08) |
| Anhui          | 74.8 (33.6 , 110.3)         | 1382389 (1159039 , 2230692)              | 3130315 (1368032 , 4824791)                 | 608.0 (241.9 , 864.4)                | 687.3 (278.0 , 981.8)   | 0.27 (0.11 , 0.38) |
| Fujian         | 25.8 (6.8 , 43.9)           | 162775 (144204 , 285846)                 | 388013 (167038 , 607014)                    | 89.9 (31.4 , 143.7)                  | 116.3 (38.5 , 188.5)    | 0.04 (0.01 , 0.06) |
| Jiangxi        | 19.4 (8.7 , 28.8)           | 354421 (294904 , 581896)                 | 793958 (342586 , 1239231)                   | 178.8 (63.7 , 280.1)                 | 199.3 (73.0 , 310.7)    | 0.10 (0.04 , 0.16) |
| Shandong       | 212.4 (64.8 , 349.1)        | 2578998 (2160860 , 4128186)              | 5841581 (2562845 , 8969803)                 | 1089.3 (446.3 , 1514.0)              | 1310.1 (515.8 , 1876.3) | 0.18 (0.07 , 0.25) |
| Henan          | 137.2 (61.7 , 202.6)        | 2289963 (1844372 , 3561044)              | 4979163 (2172280 , 7687121)                 | 982.8 (386.6 , 1406.2)               | 1127.3 (452.3 , 1620.1) | 0.25 (0.10 , 0.36) |
| Hubei          | 38.0 (17.0 , 56.4)          | 481134 (431260 , 845488)                 | 1162015 (503058 , 1807812)                  | 252.0 (92.4 , 385.2)                 | 291.6 (110.3 , 444.2)   | 0.09 (0.03 , 0.13) |
| Hunan          | 65.3 (29.3 , 96.7)          | 866185 (757567 , 1478074)                | 2042478 (886386 , 3169909)                  | 430.0 (161.1 , 643.9)                | 498.2 (192.1 , 745.2)   | 0.15 (0.06 , 0.23) |
| Guangdong      | 150.9 (78.4 , 212.4)        | 833689 (680589 , 1344575)                | 1832040 (790016 , 2861271)                  | 415.7 (147.3 , 654.4)                | 569.3 (227.2 , 871.0)   | 0.07 (0.03 , 0.10) |
| Guangxi        | 15.9 (7.1 , 23.6)           | 295937 (247606 , 490254)                 | 666332 (287017 , 1041828)                   | 153.3 (53.8 , 243.7)                 | 170.2 (61.4 , 268.8)    | 0.09 (0.03 , 0.14) |
| Hainan         | 3.7 (1.7 , 5.5)             | 63968 (52592 , 103975)                   | 141558 (61021 , 221163)                     | 32.3 (11.4 , 51.0)                   | 36.2 (13.2 , 56.8)      | 0.08 (0.03 , 0.13) |
| Chongqing      | 19.6 (8.8 , 29.1)           | 200727 (196426 , 381574)                 | 529883 (230486 , 820541)                    | 109.0 (41.5 , 161.2)                 | 129.3 (50.8 , 191.4)    | 0.08 (0.03 , 0.11) |
| Sichuan        | 21.2 (9.5 , 31.4)           | 291401 (272575 , 539393)                 | 733579 (316074 , 1146647)                   | 168.2 (59.1 , 267.0)                 | 190.4 (69.2 , 300.1)    | 0.05 (0.02 , 0.08) |
| Guizhou        | 5.5 (2.4 , 8.1)             | 107293 (103976 , 205490)                 | 279873 (120667 , 437183)                    | 63.7 (22.5 , 100.5)                  | 69.5 (25.2 , 109.3)     | 0.07 (0.02 , 0.11) |
| Yunnan         | 6.0 (2.7 , 8.8)             | 112205 (107835 , 213955)                 | 290117 (124835 , 454081)                    | 67.6 (23.5 , 108.5)                  | 74.0 (26.4 , 118.0)     | 0.05 (0.02 , 0.08) |
| Tibet          | 0                           | 0                                        | 0                                           | 0                                    | 0                       | 0                  |
| Shannxi        | 6.9 (2.9 , 10.5)            | 162010 (139712 , 277308)                 | 375863 (161700 , 588397)                    | 87.8 (30.4 , 141.1)                  | 95.2 (33.7 , 152.5)     | 0.04 (0.02 , 0.07) |
| Gansu          | 0.2 (0.0 , 0.8)             | 27839 (25471 , 50782)                    | 68487 (29398 , 107451)                      | 16.4 (5.6 , 27.0)                    | 16.7 (5.6 , 27.9)       | 0.02 (0.01 , 0.03) |
| Qinghai        | 0.0 (0.0 , 0.0)             | 155 (155 , 309)                          | 415 (178 , 653)                             | 0.1 (0.0 , 0.2)                      | 0.1 (0.0 , 0.2)         | 0.00 (0.00 , 0.00) |
| Ningxia        | 0.6 (0.1 , 1.1)             | 16392 (16392 , 32479)                    | 44108 (18992 , 68990)                       | 10.2 (3.6 , 16.3)                    | 10.8 (3.7 , 17.4)       | 0.03 (0.01 , 0.05) |
| Xinjiang       | 0.3 (0.0 , 1.0)             | 17981 (16881 , 33672)                    | 45386 (19477 , 71226)                       | 10.9 (3.7 , 18.0)                    | 11.3 (3.7 , 19.1)       | 0.01 (0.00 , 0.02) |

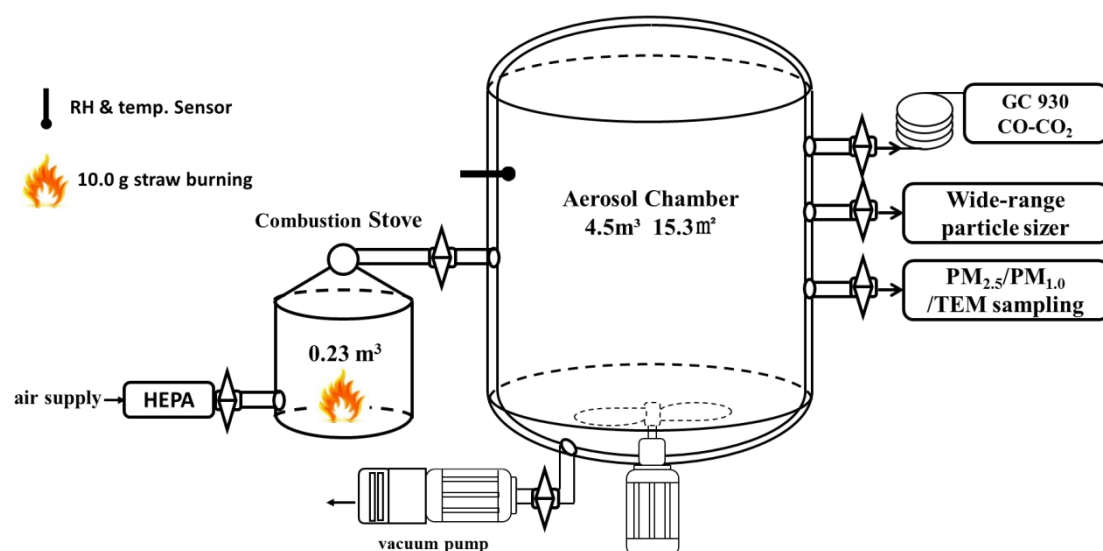

**Fig. S1.** Schematic graph of the aerosol system for agricultural straw open burning and emission characterization.

115

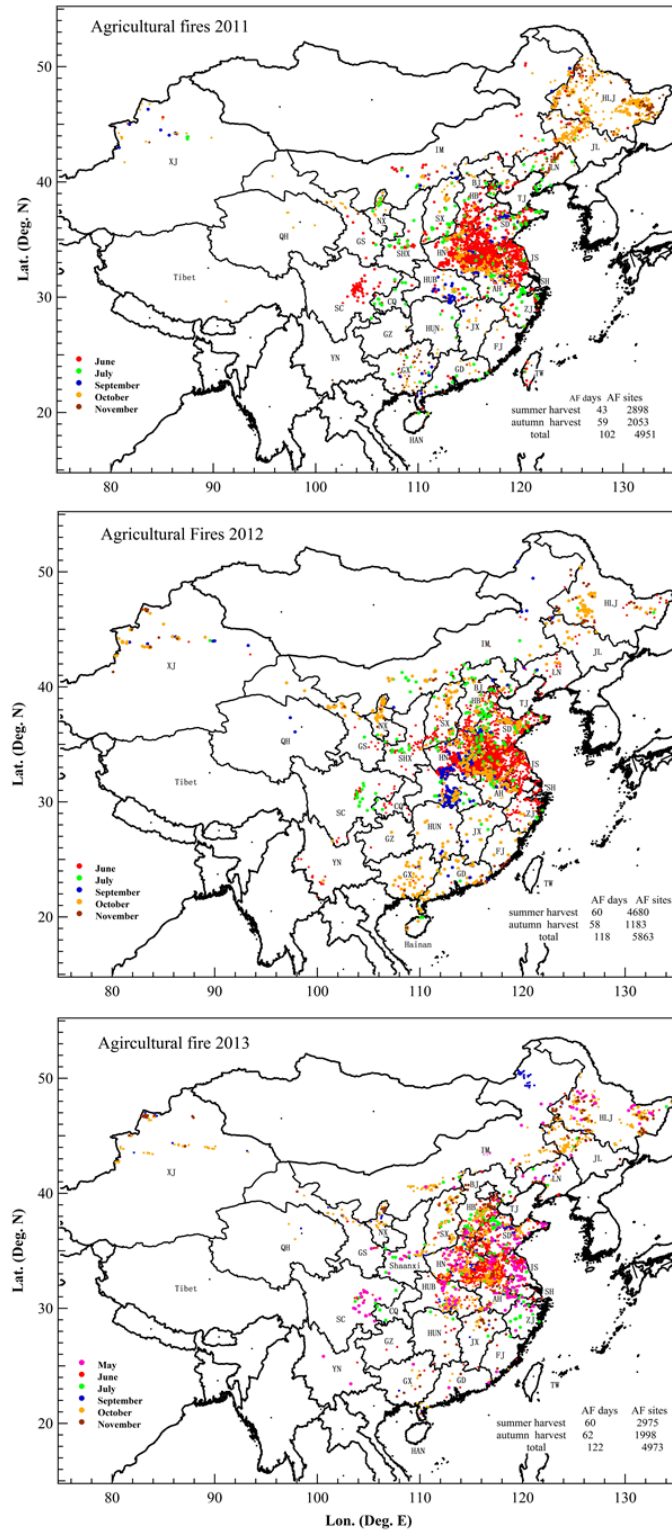

**Fig. S2.** Satellite remote sensing of agricultural fire sites from 2011 to 2013; Average nationwide open burning lasts 114 days annually, 54 days in summer harvest from May to August, 60 days in autumn harvest from September to November. (AF: short of Agricultural Fires).

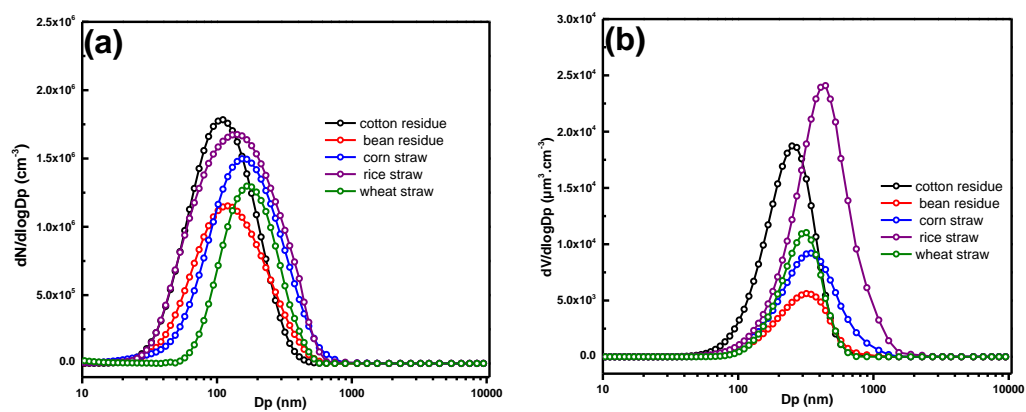

125 **Figure S3.** Size distribution of smoke particles from agricultural residue burning in term of number concentration and volume concentration.



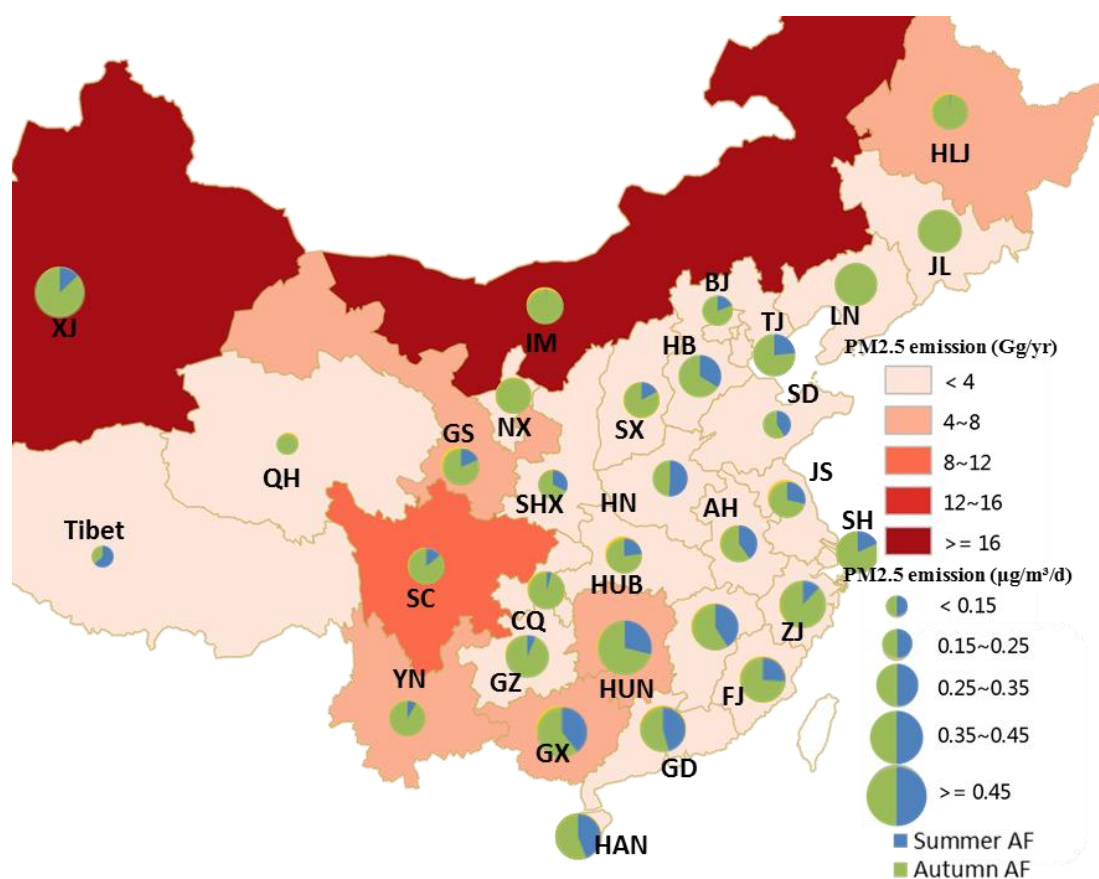

**Figure S4.** Distribution of smoke PM<sub>2.5</sub> emissions from agricultural straw burning in China under carcinogenic risk control scenarios.

# References:

- Cao, G., Zhang, X., and Zheng, F.: Inventory of black carbon and organic carbon emissions from China, *Atmos. Environ.*, 34, 6516-6527, 2006.
- 135 Cao, G., Zhang, X., Gong, S., An, X., and Wang, Y.: Emission inventories of primary particles and pollutant gases for China, *Chinese Sci. Bull.*, 8, 781-788, 2011.
- Cao, J., Xu, H., Xu, Q., Chen, B., and Kan, H.: Fine particulate matter constituents and cardiopulmonary mortality in a heavily polluted Chinese city, *Environ. Health. Persp.*, 3, 373, 2012.
- Chen, R., Li, Y., Ma, Y., Pan, G., Zeng, G., Xu, X., Chen, B., and Kan, H.: Coarse particles and  
140 mortality in three Chinese cities: The China Air Pollution and Health Effects Study (CAPES), *Sci. Total. Environ.*, 23, 4934-4938, 2011.
- Gao, M., Guttikunda, S. K., Carmichael, G. R., Wang, Y., Liu, Z., Stanier, C. O., Saide, P. E., and Yu, M.: Health impacts and economic losses assessment of the 2013 severe haze event in Beijing area, *Sci. Total Environ.*, 511, 553-561, 2015.
- 145 He, M., Zheng, J., Yin, S., and Zhang, Y.: Trends, temporal and spatial characteristics, and uncertainties in biomass burning emissions in the Pearl River Delta, China, *Atmos. Environ.*, 24, 4051-4059, 2011.
- Hou, Q., An, X., Wang, Y., Tao, Y., and Sun, Z: An assessment of China's PM<sub>10</sub>-related health economic losses in 2009, *Sci. Total Environ.*, 435-436, 61-65, 2012.
- 150 IPCC (Intergovernmental Panel on Climate Change), 2007. Greenhouse Gas Inventory Reference Manual. Revised 2006 IPCC Guidelines for National Greenhouse Gas Inventories. IPCC/OECD/IES, UK. Meteorological Office, Bracknell, UK Gas Inventories. IPCC/OECD/IES, UK.
- Kan, H., London, S. J., Chen, G., Zhang, Y., Song, G., Zhao, N., Jiang, L., Chen, B.: Differentiating the effects of fine and coarse particles on daily mortality in Shanghai, China, *Environ Int*, 3, 376-384,  
155 2007.
- Koopmans, A., and Koppejan, J.: Agricultural and forest residues-generation, utilization, and availability 1, *Modern Applications of Biomass Energy*, 1997.
- Ma, Y., Chen, R., Pan, G., Xu, X., Song, W., Chen, B., and Kan, H.: Fine particulate air pollution and daily mortality in Shenyang, China, *Sci. Total Environ.*, 13, 2473-2477, 2011.
- 160 National Bureau of Statistics of China (NBSC), China Yearbook 2001-2013, China Statistics Press,

Beijing (in Chinese).

National Bureau of Statistics of China (NBSC), China Grain Yearbook 2012, China Agri Press, Beijing (in Chinese).

165 Nisbet, I. C., and LaGoy, P. K.: Toxic equivalency factors (TEFs) for polycyclic aromatic hydrocarbons (PAHs), Regul. Toxicol. Pharm., 3, 290-300, 1992.

Wang, S. X., and Zhang, C. Y.: Spatial and temporal distribution of air pollutant emissions from open burning of crop residues in China, Science, 5, 329-333, 2008.

170 Wong, C., Vichit-Vadakan, N., Kan, H., Qian, Z., and Teams, T. P. P.: Public health and air pollution in Asia (PAPA): a multicity study of short-term effects of air pollution on mortality, Environ. Health Persp., 9, 1195-1202, 2008.

Xu, M., Guo, Y., Zhang, Y., Westerdahl, D., Mo, Y., Liang, F., and Pan, X.: Spatiotemporal analysis of particulate air pollution and ischemic heart disease mortality in Beijing, China, Environ. Health, 109, 2014.

175 Zhang, H., Hu, D., Chen, J., Ye, X., Wang, S. X., Hao, J. M., Wang, L., Zhang, R., and An, Z.: Particle size distribution and polycyclic aromatic hydrocarbons emissions from agricultural crop residue burning, Environ. Sci. Technol., 13, 5477-5482, 2011.

Zhang, H., Ye, X., Cheng, T., Chen, J., Yang, X., Wang, L., and Zhang, R.: A laboratory study of agricultural crop residue combustion in China: Emission factors and emission inventory, Atmos. Environ., 36, 8432-8441, 2008.

180 Zhang, Y. P., Zhang, Z. Q., Liu, X. H., Zhang, X. P., Feng, B. Q., and Li, H. P.: Concentration-response relationship between particulate air pollution and daily mortality in Taiyuan, Health sciences, 2, 153-157, 2007.

Zhao, B., Wang, P., Ma, J. Z., Zhu, S., Pozzer, A., and Li, W.: A high-resolution emission inventory of primary pollutants for the Huabei region, China, Atmos. Chem Phys., 1, 481-501, 2012.

185
